# Supplementary material for: The function and regulatory mechanism of tea plant transcription factor CsMYB116 in drought stress response
Source: Research Square preprint supplement (doi:10.21203/rs.3.rs-8519228/v1), 2026-01-14
Supplement: Supplementary file 1 [file 0e2e3c94620fdc69bf4789f3.docx]

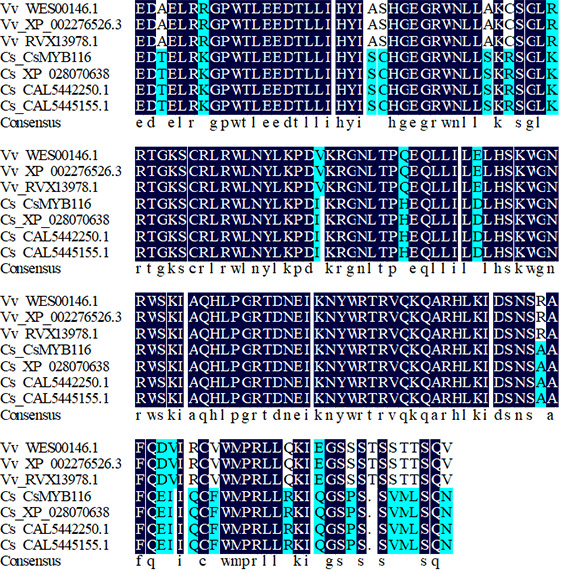


**Fig.S1** Multiple sequence alignment of the *CsMYB116* protein with homologous proteins.

**
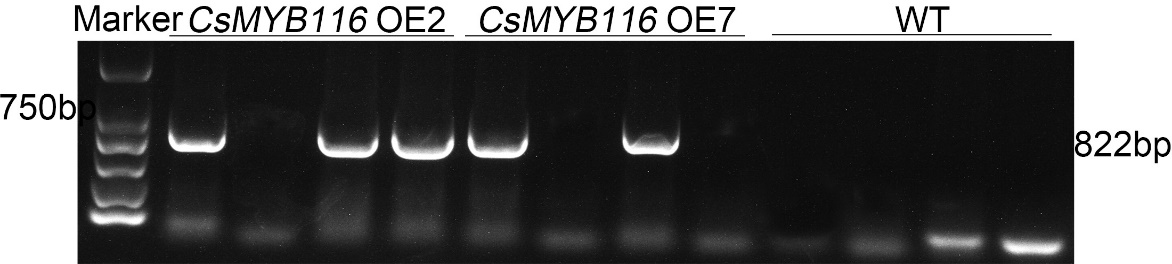
**

**Fig.S2** DNA gel electrophoresis verification of integration of *CsMYB116* gene in overexpressed *Arabidopsis thaliana.*
