# Supplementary material for: The function and regulatory mechanism of tea plant transcription factor CsMYB116 in drought stress response
Source: Research Square preprint supplement (doi:10.21203/rs.3.rs-8519228/v1), 2026-01-14
Supplement: Supplementary file 2 [file 44324fd357bf5c77ff381e2d.xlsx]

## Sheet: Table S1
Table S1 Differentially expressed genes (DEGs) data
Gene_id	log2FoldChange	p-value	Regulation	Gene_symbol	Description	GO_id	GO_term	Pathway	Pathway_description
CSS0000001	1.50301	0.205739	Up	CYC	Transcription factor CYCLOIDEA (Fragment)	GO:0005634,GO:0003677,GO:0003700	nucleus|DNA binding|DNA-binding transcription factor activity
CSS0000002	1.85391	0.111701	Up
CSS0000003	-0.202042	0.328352	Down
CSS0000005	0.716841	0.287702	Up	CGLD27	Protein CONSERVED IN THE GREEN LINEAGE AND DIATOMS 27, chloroplastic	GO:0009507,GO:0016020,GO:1990641	chloroplast|membrane|response to iron ion starvation
CSS0000006	-0.557585	0.203145	Down	EMB2768	Tyrosine--tRNA ligase, chloroplastic/mitochondrial	GO:0009507,GO:0009570,GO:0005829,GO:0005739,GO:0005524,GO:0003723,GO:0004831,GO:0009793,GO:0043039,GO:0006437	chloroplast|chloroplast stroma|cytosol|mitochondrion|ATP binding|RNA binding|tyrosine-tRNA ligase activity|embryo development ending in seed dormancy|tRNA aminoacylation|tyrosyl-tRNA aminoacylation	ko00970	Aminoacyl-tRNA biosynthesis
CSS0000007	0.300019	0.500148	Up	IQM6	IQ domain-containing protein IQM6	GO:0005737,GO:0005634	cytoplasm|nucleus
CSS0000010	0.38516	0.310636	Up	At1g79540	Pentatricopeptide repeat-containing protein At1g79540	GO:0003729	mRNA binding
CSS0000013	-1.62153	0.00585344	Down	APF1	Aspartyl protease family protein 1	GO:0005886,GO:0004190,GO:0006508	plasma membrane|aspartic-type endopeptidase activity|proteolysis
CSS0000014	1.85658	0.494264	Up	CBSX3	CBS domain-containing protein CBSX3, mitochondrial	GO:0005829,GO:0005739,GO:0005886,GO:0050897,GO:0045454	cytosol|mitochondrion|plasma membrane|cobalt ion binding|cell redox homeostasis
CSS0000015	-0.0484575	0.793669	Down	HUB2	E3 ubiquitin-protein ligase BRE1-like 2	GO:0033503,GO:0005634,GO:0046872,GO:0042803,GO:0061630,GO:0006325,GO:0071894,GO:0033523,GO:0010390,GO:0045087,GO:0009965,GO:0010162,GO:0010228	HULC complex|nucleus|metal ion binding|protein homodimerization activity|ubiquitin protein ligase activity|chromatin organization|histone H2B conserved C-terminal lysine ubiquitination|histone H2B ubiquitination|histone monoubiquitination|innate immune response|leaf morphogenesis|seed dormancy process|vegetative to reproductive phase transition of meristem
CSS0000017	2.15379	0.0450856	Up	LRX2	Leucine-rich repeat extensin-like protein 2	GO:0005576,GO:0071555	extracellular region|cell wall organization
CSS0000018	-0.826974	0.0677366	Down	EAP3	Protein ENDOPLASMIC RETICULUM-ARRESTED PEN3	GO:0005829,GO:0050832,GO:0006886,GO:0051260,GO:0016567	cytosol|defense response to fungus|intracellular protein transport|protein homooligomerization|protein ubiquitination
CSS0000019	0.411949	0.466376	Up
CSS0000020	-0.710645	0.205732	Down	At1g73710	Pentatricopeptide repeat-containing protein At1g73710
CSS0000021	1.00898	0.257575	Up	At1g04970	Putative BPI/LBP family protein At1g04970	GO:0005615,GO:0000325,GO:0001530,GO:1903409,GO:0010468	extracellular space|plant-type vacuole|lipopolysaccharide binding|reactive oxygen species biosynthetic process|regulation of gene expression
CSS0000022	-0.894033	0.0126134	Down	At1g02370	Pentatricopeptide repeat-containing protein At1g02370, mitochondrial	GO:0005739	mitochondrion
CSS0000023	-1.86179	0.150982	Down
CSS0000024	4.37073	0.000848244	Up	DREB3	Dehydration-responsive element-binding protein 3	GO:0005634,GO:0003700,GO:0043565,GO:0009873,GO:0045893	nucleus|DNA-binding transcription factor activity|sequence-specific DNA binding|ethylene-activated signaling pathway|positive regulation of DNA-templated transcription
CSS0000026	-0.650244	0.091108	Down	Os03g0733400	Zinc finger BED domain-containing protein RICESLEEPER 2	GO:0005634,GO:0003677,GO:0046872,GO:0046983,GO:0009791	nucleus|DNA binding|metal ion binding|protein dimerization activity|post-embryonic development
CSS0000027	0.0829863	0.800328	Up	CXE16	Probable carboxylesterase 16	GO:0106435	carboxylesterase activity
CSS0000028	2.16772	0.108116	Up
CSS0000029	-1.04298	0.00163474	Down	POT11	Potassium transporter 11	GO:0016020,GO:0005886,GO:0015079,GO:0006813	membrane|plasma membrane|potassium ion transmembrane transporter activity|potassium ion transport
CSS0000032	2.21876	0.0030198	Up
CSS0000033	0.250347	0.353872	Up	At1g74510	F-box/kelch-repeat protein At1g74510	GO:0005634	nucleus
CSS0000034	5.623	2.38885e-06	Up
CSS0000037	0.0904586	0.915609	Up
CSS0000039	-1.40018	0.509454	Down	GNS1	Glucan endo-1,3-beta-glucosidase, basic isoform	GO:0042973,GO:0005975,GO:0006952,GO:0009607	glucan endo-1,3-beta-D-glucosidase activity|carbohydrate metabolic process|defense response|response to biotic stimulus
CSS0000040	0.176713	0.841701	Up
CSS0000041	0.568553	0.460366	Up
CSS0000042	-1.81104	0.0948773	Down		Glucan endo-1,3-beta-glucosidase, acidic isoform PR-Q'	GO:0048046,GO:0005886,GO:0042973,GO:0005975,GO:0006952	apoplast|plasma membrane|glucan endo-1,3-beta-D-glucosidase activity|carbohydrate metabolic process|defense response
CSS0000043	6.66823	0.0719927	Up	DIR21	Dirigent protein 21	GO:0005576,GO:0009699	extracellular region|phenylpropanoid biosynthetic process
CSS0000044	0.420254	0.227929	Up	BAG4	BAG family molecular chaperone regulator 4	GO:0005829,GO:0005783,GO:0070971,GO:0000774,GO:0051087,GO:0043268,GO:0050821,GO:0006612,GO:0010119,GO:0009409,GO:0009651,GO:0010228	cytosol|endoplasmic reticulum|endoplasmic reticulum exit site|adenyl-nucleotide exchange factor activity|chaperone binding|positive regulation of potassium ion transport|protein stabilization|protein targeting to membrane|regulation of stomatal movement|response to cold|response to salt stress|vegetative to reproductive phase transition of meristem
CSS0000046	-0.86975	0.0504248	Down	ACR9	ACT domain-containing protein ACR9
CSS0000047	-0.0354803	0.855202	Down	RPL35	60S ribosomal protein L35	GO:0022625,GO:0003735,GO:0000463,GO:0006412	cytosolic large ribosomal subunit|structural constituent of ribosome|maturation of LSU-rRNA from tricistronic rRNA transcript (SSU-rRNA, 5.8S rRNA, LSU-rRNA)|translation	ko03010	Ribosome
CSS0000049	8.19857	4.16171e-09	Up		(3S,6E)-nerolidol synthase 1	GO:0005829,GO:0000287,GO:0010333,GO:0016102	cytosol|magnesium ion binding|terpene synthase activity|diterpenoid biosynthetic process	ko00909	Sesquiterpenoid and triterpenoid biosynthesis
CSS0000050	0.684457	0.600964	Up	At5g65660	Uncharacterized protein At5g65660	GO:0016020	membrane
CSS0000051	0.234341	0.455435	Up	At5g03900	Uncharacterized protein At5g03900, chloroplastic	GO:0009941,GO:0031969,GO:0009536	chloroplast envelope|chloroplast membrane|plastid
CSS0000053	-0.154355	0.693355	Down	CIA2	Protein CHLOROPLAST IMPORT APPARATUS 2	GO:0009507,GO:0005634,GO:0045036,GO:0006355	chloroplast|nucleus|protein targeting to chloroplast|regulation of DNA-templated transcription
CSS0000054	0.499293	0.207517	Up	At1g54730	Sugar transporter ERD6-like 5	GO:0016020,GO:0051119,GO:0022857,GO:0055085	membrane|sugar transmembrane transporter activity|transmembrane transporter activity|transmembrane transport
CSS0000055	0.279183	0.422592	Up	S40-4	Protein S40-4	GO:0005737,GO:0010150,GO:0009737,GO:0009646,GO:0009617,GO:0009753,GO:0009751	cytoplasm|leaf senescence|response to abscisic acid|response to absence of light|response to bacterium|response to jasmonic acid|response to salicylic acid
CSS0000057	-0.24566	0.416836	Down	BXL6	Probable beta-D-xylosidase 6	GO:0005829,GO:0005576,GO:0000325,GO:0005773,GO:0046556,GO:0009044,GO:0031222,GO:0045493	cytosol|extracellular region|plant-type vacuole|vacuole|alpha-L-arabinofuranosidase activity|xylan 1,4-beta-xylosidase activity|arabinan catabolic process|xylan catabolic process
CSS0000059	3.30031	1.42705e-08	Up	VIT_01s0010g01870	CASP-like protein 2A1	GO:0005886,GO:0051539	plasma membrane|4 iron, 4 sulfur cluster binding
CSS0000061	0.70638	0.207623	Up	BC10	Glycosyltransferase BC10	GO:0000139,GO:0016757,GO:0030244,GO:0009664	Golgi membrane|glycosyltransferase activity|cellulose biosynthetic process|plant-type cell wall organization
CSS0000063	-0.0412932	0.935615	Down		Cytochrome P450 CYP72A219	GO:0016020,GO:0020037,GO:0005506,GO:0004497,GO:0016705	membrane|heme binding|iron ion binding|monooxygenase activity|oxidoreductase activity, acting on paired donors, with incorporation or reduction of molecular oxygen
CSS0000064	0.77118	0.0636399	Up
CSS0000065	-0.769689	0.00922167	Down
CSS0000068	-0.442606	0.0990514	Down	RHG1A	Probable E3 ubiquitin-protein ligase RHG1A	GO:0046872,GO:0061630	metal ion binding|ubiquitin protein ligase activity
CSS0000071	1.95306	0.174664	Up
CSS0000075	0.133778	0.695608	Up
CSS0000076	1.51376	0.00395061	Up	At4g01130	GDSL esterase/lipase At4g01130	GO:0005829,GO:0005576,GO:0016788,GO:0016042	cytosol|extracellular region|hydrolase activity, acting on ester bonds|lipid catabolic process
CSS0000078	-0.00553095	0.989628	Down	BLH7	BEL1-like homeodomain protein 7	GO:0005634,GO:0003700,GO:0000981,GO:0000978,GO:0000976,GO:0006357	nucleus|DNA-binding transcription factor activity|DNA-binding transcription factor activity, RNA polymerase II-specific|RNA polymerase II cis-regulatory region sequence-specific DNA binding|transcription cis-regulatory region binding|regulation of transcription by RNA polymerase II
CSS0000081	-0.0304474	0.897028	Down
CSS0000082	-0.0588596	0.79385	Down
CSS0000084	0.235386	0.651801	Up	At3g22670	Pentatricopeptide repeat-containing protein At3g22670, mitochondrial	GO:0005739	mitochondrion
CSS0000085	-0.0584271	0.950023	Down
CSS0000087	-0.711542	0.547671	Down	CABIN1	Calcineurin-binding protein 1	GO:0005634,GO:0006325	nucleus|chromatin organization
CSS0000088	0.398816	0.54178	Up	D14	Strigolactone esterase D14	GO:0005737,GO:0005634,GO:0016787,GO:0010223,GO:1901601	cytoplasm|nucleus|hydrolase activity|secondary shoot formation|strigolactone biosynthetic process
CSS0000089	3.31945	0.000512457	Up	ADG2	Glucose-1-phosphate adenylyltransferase large subunit 1, chloroplastic	GO:0009507,GO:0009941,GO:0009570,GO:0005524,GO:0008878,GO:0005978,GO:0019252	chloroplast|chloroplast envelope|chloroplast stroma|ATP binding|glucose-1-phosphate adenylyltransferase activity|glycogen biosynthetic process|starch biosynthetic process	ko00500,ko00520	Starch and sucrose metabolism|Amino sugar and nucleotide sugar metabolism
CSS0000091	-0.20295	0.551695	Down	At2g25100	Ribonuclease H2 subunit A	GO:0032299,GO:0046872,GO:0003723,GO:0004523,GO:0043137,GO:0006298	ribonuclease H2 complex|metal ion binding|RNA binding|RNA-DNA hybrid ribonuclease activity|DNA replication, removal of RNA primer|mismatch repair	ko03030	DNA replication
CSS0000092	-0.30873	0.603325	Down	AHL16	AT-hook motif nuclear-localized protein 16	GO:0005634,GO:0031490,GO:0003700,GO:0003680,GO:0035067,GO:0010529,GO:0010208,GO:1900111,GO:0010228	nucleus|chromatin DNA binding|DNA-binding transcription factor activity|minor groove of adenine-thymine-rich DNA binding|negative regulation of histone acetylation|negative regulation of transposition|pollen wall assembly|positive regulation of histone H3-K9 dimethylation|vegetative to reproductive phase transition of meristem
CSS0000093	0.445397	0.570749	Up	At3g61520	Pentatricopeptide repeat-containing protein At3g61520, mitochondrial	GO:0005739	mitochondrion
CSS0000094	0.0470828	0.902688	Up	HISN4	Imidazole glycerol phosphate synthase hisHF, chloroplastic	GO:0009507,GO:0009570,GO:0009536,GO:0004359,GO:0000107,GO:0016833,GO:0006541,GO:0000105	chloroplast|chloroplast stroma|plastid|glutaminase activity|imidazoleglycerol-phosphate synthase activity|oxo-acid-lyase activity|glutamine metabolic process|histidine biosynthetic process	ko00340	Histidine metabolism
CSS0000095	7.32788	9.18939e-05	Up
CSS0000096	-1.20247	0.0099094	Down	KEU	SNARE-interacting protein KEULE	GO:0005856,GO:0005829,GO:0019898,GO:0009524,GO:0000325,GO:0005886,GO:0030141,GO:0019905,GO:0000911,GO:0006886,GO:0006904,GO:0016192	cytoskeleton|cytosol|extrinsic component of membrane|phragmoplast|plant-type vacuole|plasma membrane|secretory granule|syntaxin binding|cytokinesis by cell plate formation|intracellular protein transport|vesicle docking involved in exocytosis|vesicle-mediated transport
CSS0000099	-3.91689	0.31236	Down	At1g22430	Alcohol dehydrogenase-like 1	GO:0005829,GO:0005634,GO:0004024,GO:0051903,GO:0008270,GO:0046294	cytosol|nucleus|alcohol dehydrogenase activity, zinc-dependent|S-(hydroxymethyl)glutathione dehydrogenase activity|zinc ion binding|formaldehyde catabolic process	ko00010,ko00620,ko00071,ko00350	Glycolysis / Gluconeogenesis|Pyruvate metabolism|Fatty acid degradation|Tyrosine metabolism
CSS0000101	0.662654	0.298134	Up	RPL3	50S ribosomal protein L3, chloroplastic (Fragment)	GO:0009507,GO:1990904,GO:0005840,GO:0019843,GO:0003735,GO:0006412	chloroplast|ribonucleoprotein complex|ribosome|rRNA binding|structural constituent of ribosome|translation	ko03010	Ribosome
CSS0000102	0.191946	0.882918	Up	At2g48060/At2g48040/At2g48050	Piezo-type mechanosensitive ion channel homolog	GO:0016020,GO:0005634,GO:0050982,GO:0006811	membrane|nucleus|detection of mechanical stimulus|ion transport
CSS0000103	0.261725	0.332926	Up	CARB	Carbamoyl-phosphate synthase large chain, chloroplastic	GO:0005951,GO:0009507,GO:0009570,GO:0005737,GO:0005524,GO:0004088,GO:0046872,GO:0016740,GO:0044205,GO:0006526,GO:0016036,GO:0006541,GO:0006807	carbamoyl-phosphate synthase complex|chloroplast|chloroplast stroma|cytoplasm|ATP binding|carbamoyl-phosphate synthase (glutamine-hydrolyzing) activity|metal ion binding|transferase activity|'de novo' UMP biosynthetic process|arginine biosynthetic process|cellular response to phosphate starvation|glutamine metabolic process|nitrogen compound metabolic process	ko00240,ko00250	Pyrimidine metabolism|Alanine, aspartate and glutamate metabolism
CSS0000104	0.0170707	0.993103	Up	At4g22030	Probable F-box protein At4g22030
CSS0000105	0.467564	0.757605	Up	Os07g0682400	Zinc finger CCCH domain-containing protein 53	GO:0003677,GO:0046872,GO:0003723	DNA binding|metal ion binding|RNA binding
CSS0000106	0.690326	0.283505	Up	GDI1	Rho GDP-dissociation inhibitor 1	GO:0005829,GO:0016020,GO:0005096,GO:0005094,GO:0009932,GO:0007266,GO:0010053	cytosol|membrane|GTPase activator activity|Rho GDP-dissociation inhibitor activity|cell tip growth|Rho protein signal transduction|root epidermal cell differentiation
CSS0000109	-0.0189323	0.957124	Down
CSS0000111	-0.14339	0.677137	Down	APSR1	Protein ALTERED PHOSPHATE STARVATION RESPONSE 1	GO:0005634	nucleus
CSS0000113	-0.00510427	0.982988	Down
CSS0000114	-0.953529	0.401906	Down	At1g61390	G-type lectin S-receptor-like serine/threonine-protein kinase At1g61390	GO:0005886,GO:0005524,GO:0005516,GO:0030246,GO:0106310,GO:0004674,GO:0031625,GO:0045087,GO:0006468,GO:0048544	plasma membrane|ATP binding|calmodulin binding|carbohydrate binding|protein serine kinase activity|protein serine/threonine kinase activity|ubiquitin protein ligase binding|innate immune response|protein phosphorylation|recognition of pollen
CSS0000115	0.109569	0.900046	Up	MED27	Mediator of RNA polymerase II transcription subunit 27	GO:0016592,GO:0003713,GO:0006357	mediator complex|transcription coactivator activity|regulation of transcription by RNA polymerase II
CSS0000116	5.77513	0.000717625	Up	SAT	Stemmadenine O-acetyltransferase	GO:0016746,GO:0016491,GO:0009820	acyltransferase activity|oxidoreductase activity|alkaloid metabolic process	ko00940,ko00945,ko00941	Phenylpropanoid biosynthesis|Stilbenoid, diarylheptanoid and gingerol biosynthesis|Flavonoid biosynthesis
CSS0000117	0.189867	0.69473	Up	PUB9	U-box domain-containing protein 9	GO:0005737,GO:0005634,GO:0005886,GO:0070696,GO:0004842,GO:0009738,GO:0071215,GO:0048527,GO:0016567	cytoplasm|nucleus|plasma membrane|transmembrane receptor protein serine/threonine kinase binding|ubiquitin-protein transferase activity|abscisic acid-activated signaling pathway|cellular response to abscisic acid stimulus|lateral root development|protein ubiquitination
CSS0000118	-0.319639	0.503062	Down	UCC1	Uclacyanin 1	GO:0005886,GO:0009055,GO:0046872	plasma membrane|electron transfer activity|metal ion binding
CSS0000121	0.734455	0.0766929	Up
CSS0000124	-0.184239	0.414124	Down
CSS0000125	0.203449	0.89344	Up	EMB1027	Arginine--tRNA ligase, chloroplastic/mitochondrial	GO:0009507,GO:0009570,GO:0005829,GO:0005739,GO:0004814,GO:0005524,GO:0006420,GO:0009793	chloroplast|chloroplast stroma|cytosol|mitochondrion|arginine-tRNA ligase activity|ATP binding|arginyl-tRNA aminoacylation|embryo development ending in seed dormancy	ko00970	Aminoacyl-tRNA biosynthesis
CSS0000126	3.81594	1.69424e-05	Up	At5g10770	Aspartyl protease family protein At5g10770	GO:0005886,GO:0004190,GO:0006508	plasma membrane|aspartic-type endopeptidase activity|proteolysis
CSS0000127	-0.394855	0.449461	Down	At5g49610	F-box protein At5g49610	GO:0016567	protein ubiquitination
CSS0000128	3.01056	2.28662e-07	Up	TSO1	CRC domain-containing protein TSO1	GO:0005634,GO:0003700,GO:0046872,GO:0000976,GO:0010481,GO:0048444,GO:0010235,GO:0051302,GO:0009934	nucleus|DNA-binding transcription factor activity|metal ion binding|transcription cis-regulatory region binding|epidermal cell division|floral organ morphogenesis|guard mother cell cytokinesis|regulation of cell division|regulation of meristem structural organization
CSS0000129	5.76859	3.32585e-06	Up	RTNLB9	Reticulon-like protein B9	GO:0005789	endoplasmic reticulum membrane
CSS0000130	-3.03152	0.00594986	Down	RPL24A	60S ribosomal protein L24-1	GO:0022625,GO:0005783,GO:0003729,GO:0003735,GO:0002181	cytosolic large ribosomal subunit|endoplasmic reticulum|mRNA binding|structural constituent of ribosome|cytoplasmic translation	ko03010	Ribosome
CSS0000132	-4.4376	0.258992	Down	PR	Perakine reductase	GO:0016491,GO:0009820	oxidoreductase activity|alkaloid metabolic process
CSS0000134	0.0266015	0.932414	Up
CSS0000135	-0.147363	0.581759	Down	TOP3A	DNA topoisomerase 3-alpha	GO:0005694,GO:0005634,GO:0003677,GO:0003916,GO:0003917,GO:0008270,GO:0007059,GO:0006281,GO:0006265,GO:0051321,GO:0000278,GO:0000712	chromosome|nucleus|DNA binding|DNA topoisomerase activity|DNA topoisomerase type I (single strand cut, ATP-independent) activity|zinc ion binding|chromosome segregation|DNA repair|DNA topological change|meiotic cell cycle|mitotic cell cycle|resolution of meiotic recombination intermediates
CSS0000136	3.00626	1.47026e-06	Up	TUBA	Tubulin alpha chain	GO:0005737,GO:0005874,GO:0005525,GO:0016787,GO:0046872,GO:0005200,GO:0007017	cytoplasm|microtubule|GTP binding|hydrolase activity|metal ion binding|structural constituent of cytoskeleton|microtubule-based process	ko04145,ko04814	Phagosome|Motor proteins
CSS0000137	0.0566509	0.90574	Up	At5g53970	Probable aminotransferase TAT2	GO:0005829,GO:0004838,GO:0030170,GO:0006572,GO:0010189	cytosol|L-tyrosine:2-oxoglutarate aminotransferase activity|pyridoxal phosphate binding|tyrosine catabolic process|vitamin E biosynthetic process	ko00270,ko00350,ko00360,ko00400,ko00130,ko00950,ko00960	Cysteine and methionine metabolism|Tyrosine metabolism|Phenylalanine metabolism|Phenylalanine, tyrosine and tryptophan biosynthesis|Ubiquinone and other terpenoid-quinone biosynthesis|Isoquinoline alkaloid biosynthesis|Tropane, piperidine and pyridine alkaloid biosynthesis
CSS0000138	-0.112774	0.836273	Down	At1g18440	Peptidyl-tRNA hydrolase, chloroplastic	GO:0009507,GO:0009570,GO:0004045	chloroplast|chloroplast stroma|aminoacyl-tRNA hydrolase activity
CSS0000139	0.469933	0.235743	Up	PTST	Protein PTST homolog 3, chloroplastic	GO:0009507,GO:0010581,GO:0019252	chloroplast|regulation of starch biosynthetic process|starch biosynthetic process
CSS0000141	1.18607	0.225788	Up	KIN13B	Kinesin-like protein KIN-13B	GO:0005874,GO:0005524,GO:0008017,GO:0003777,GO:0007019,GO:0007018,GO:1903338	microtubule|ATP binding|microtubule binding|microtubule motor activity|microtubule depolymerization|microtubule-based movement|regulation of cell wall organization or biogenesis	ko04814	Motor proteins
CSS0000142	-0.221114	0.871273	Down
CSS0000143	0.752897	0.120606	Up	XI-F	Myosin-12	GO:0015629,GO:0005737,GO:0016461,GO:0031982,GO:0051015,GO:0005524,GO:0005516,GO:0003774,GO:0000146,GO:0007015,GO:0030048,GO:0030050	actin cytoskeleton|cytoplasm|unconventional myosin complex|vesicle|actin filament binding|ATP binding|calmodulin binding|cytoskeletal motor activity|microfilament motor activity|actin filament organization|actin filament-based movement|vesicle transport along actin filament	ko04814	Motor proteins
CSS0000144	-1.81483	0.122197	Down	SARD1	Protein SAR DEFICIENT 1	GO:0005634,GO:0003700,GO:0043565,GO:0071219,GO:0042742,GO:0002229,GO:0009626,GO:1900426,GO:0006355,GO:0080142,GO:0010112,GO:0009617,GO:0010224	nucleus|DNA-binding transcription factor activity|sequence-specific DNA binding|cellular response to molecule of bacterial origin|defense response to bacterium|defense response to oomycetes|plant-type hypersensitive response|positive regulation of defense response to bacterium|regulation of DNA-templated transcription|regulation of salicylic acid biosynthetic process|regulation of systemic acquir…
CSS0000146	-0.709823	0.0892055	Down	At3g52030	F-box/WD-40 repeat-containing protein At3g52030	GO:0048188,GO:0042393,GO:0051568	Set1C/COMPASS complex|histone binding|histone H3-K4 methylation
CSS0000147	4.88305	0.0473359	Up	ACR4	Serine/threonine-protein kinase-like protein ACR4	GO:0009986,GO:0030139,GO:0032585,GO:0005886,GO:0005524,GO:0042803,GO:0106310,GO:0004674,GO:0019199,GO:0009793,GO:0048439,GO:0010311,GO:0032877,GO:0046777,GO:0009786,GO:0048829,GO:0048364,GO:0090392	cell surface|endocytic vesicle|multivesicular body membrane|plasma membrane|ATP binding|protein homodimerization activity|protein serine kinase activity|protein serine/threonine kinase activity|transmembrane receptor protein kinase activity|embryo development ending in seed dormancy|flower morphogenesis|lateral root formation|positive regulation of DNA endoreduplication|protein autophosphorylatio…
CSS0000151	0.935785	0.0771013	Up
CSS0000153	-0.152709	0.814333	Down	DNAJ1	DnaJ protein homolog	GO:0005886,GO:0005524,GO:0030544,GO:0046872,GO:0051082,GO:0006457,GO:0009408	plasma membrane|ATP binding|Hsp70 protein binding|metal ion binding|unfolded protein binding|protein folding|response to heat
CSS0000154	0.862162	0.510594	Up		Retrovirus-related Pol polyprotein from transposon TNT 1-94	GO:0004190,GO:0004519,GO:0003676,GO:0003964,GO:0008270,GO:0015074,GO:0006508	aspartic-type endopeptidase activity|endonuclease activity|nucleic acid binding|RNA-directed DNA polymerase activity|zinc ion binding|DNA integration|proteolysis
CSS0000155	0.3725	0.442905	Up	SNRNP59	U11/U12 small nuclear ribonucleoprotein 59 kDa protein	GO:0005681,GO:0006397,GO:0008380	spliceosomal complex|mRNA processing|RNA splicing
CSS0000156	0.0443485	0.93885	Up	PIF1	Transcription factor PIF1	GO:0005634,GO:0003677,GO:0003700,GO:0042802,GO:0010313,GO:0046983,GO:0015995,GO:0009740,GO:0009686,GO:0006783,GO:0009959,GO:0010100,GO:0010187,GO:0010161,GO:0006355,GO:0010099,GO:0010029	nucleus|DNA binding|DNA-binding transcription factor activity|identical protein binding|phytochrome binding|protein dimerization activity|chlorophyll biosynthetic process|gibberellic acid mediated signaling pathway|gibberellin biosynthetic process|heme biosynthetic process|negative gravitropism|negative regulation of photomorphogenesis|negative regulation of seed germination|red light signaling p…
CSS0000157	0.64225	0.0482589	Up	PDP5	PWWP domain-containing protein 5	GO:0035098,GO:0098532,GO:0006355	ESC/E(Z) complex|histone H3-K27 trimethylation|regulation of DNA-templated transcription
CSS0000158	-0.0159807	0.935974	Down	PIL15	Transcription factor PHYTOCHROME INTERACTING FACTOR-LIKE 15	GO:0005634,GO:0003677,GO:0003700,GO:0046983,GO:0090229,GO:0006355	nucleus|DNA binding|DNA-binding transcription factor activity|protein dimerization activity|negative regulation of red or far-red light signaling pathway|regulation of DNA-templated transcription	ko04075,ko04712	Plant hormone signal transduction|Circadian rhythm - plant
CSS0000159	-0.528775	0.0988377	Down
CSS0000162	0.939356	0.03837	Up	At3g13560	Glucan endo-1,3-beta-glucosidase 4	GO:0005829,GO:0005886,GO:0042973,GO:0005975,GO:0006952	cytosol|plasma membrane|glucan endo-1,3-beta-D-glucosidase activity|carbohydrate metabolic process|defense response	ko00500	Starch and sucrose metabolism
CSS0000164	-0.272034	0.697959	Down	PBS1	Serine/threonine-protein kinase PBS1	GO:0005886,GO:0005524,GO:0004672,GO:0106310,GO:0004674,GO:0006952,GO:0042742,GO:0045087,GO:0002221,GO:0046777	plasma membrane|ATP binding|protein kinase activity|protein serine kinase activity|protein serine/threonine kinase activity|defense response|defense response to bacterium|innate immune response|pattern recognition receptor signaling pathway|protein autophosphorylation	ko04626	Plant-pathogen interaction
CSS0000166	0.165828	0.805762	Up
CSS0000167	-0.339856	0.17176	Down	TAF15	Transcription initiation factor TFIID subunit 15	GO:0005634,GO:0046872,GO:0003723	nucleus|metal ion binding|RNA binding
CSS0000168	-0.494301	0.416335	Down	COBL7	COBRA-like protein 7	GO:0005768,GO:0005794,GO:0005886,GO:0009506,GO:0005802,GO:0010215	endosome|Golgi apparatus|plasma membrane|plasmodesma|trans-Golgi network|cellulose microfibril organization
CSS0000172	4.15435	0.0101021	Up	POT1	Potassium transporter 1	GO:0016020,GO:0005886,GO:0015079,GO:0006813	membrane|plasma membrane|potassium ion transmembrane transporter activity|potassium ion transport
CSS0000174	-0.0864845	0.778458	Down	At2g39910	Uncharacterized protein At2g39910
CSS0000175	0.22525	0.616149	Up	TOM1	Tobamovirus multiplication protein 1	GO:0009705,GO:0046786	plant-type vacuole membrane|viral replication complex formation and maintenance
CSS0000176	-0.346199	0.164678	Down	PBA1	Proteasome subunit beta type-6	GO:0005737,GO:0005634,GO:0005839,GO:0019774,GO:0004175,GO:0004298,GO:0010498	cytoplasm|nucleus|proteasome core complex|proteasome core complex, beta-subunit complex|endopeptidase activity|threonine-type endopeptidase activity|proteasomal protein catabolic process	ko03050	Proteasome
CSS0000178	-0.0902714	0.918219	Down
CSS0000179	0.705086	0.105143	Up
CSS0000181	2.41691	0.0693115	Up	Os02g0491600	Putative germin-like protein 2-1	GO:0048046,GO:0030145	apoplast|manganese ion binding
CSS0000182	-0.256551	0.153647	Down	At5g47430	E3 ubiquitin ligase PQT3-like	GO:0005634,GO:0003676,GO:0061630,GO:0008270,GO:0006397,GO:0016567,GO:0006511	nucleus|nucleic acid binding|ubiquitin protein ligase activity|zinc ion binding|mRNA processing|protein ubiquitination|ubiquitin-dependent protein catabolic process
CSS0000184	0.431488	0.268983	Up	LRK10	Rust resistance kinase Lr10	GO:0005886,GO:0005524,GO:0106310,GO:0004674,GO:0006468	plasma membrane|ATP binding|protein serine kinase activity|protein serine/threonine kinase activity|protein phosphorylation
CSS0000185	-0.124413	0.692285	Down	GGT3	Glutathione hydrolase 3	GO:0005886,GO:0005774,GO:0005773,GO:0016756,GO:0036374,GO:0102953,GO:0103068,GO:0006751,GO:0009636,GO:0006805	plasma membrane|vacuolar membrane|vacuole|glutathione gamma-glutamylcysteinyltransferase activity|glutathione hydrolase activity|hypoglycin A gamma-glutamyl transpeptidase activity|leukotriene C4 gamma-glutamyl transferase activity|glutathione catabolic process|response to toxic substance|xenobiotic metabolic process	ko00590,ko00430,ko00460,ko00480	Arachidonic acid metabolism|Taurine and hypotaurine metabolism|Cyanoamino acid metabolism|Glutathione metabolism
CSS0000186	0.623493	0.0916023	Up
CSS0000187	0.988647	0.441571	Up	CYCA1-1	Cyclin-A1-1	GO:0000307,GO:0005737,GO:0005634,GO:0016538,GO:0051301,GO:0044772,GO:0000079	cyclin-dependent protein kinase holoenzyme complex|cytoplasm|nucleus|cyclin-dependent protein serine/threonine kinase regulator activity|cell division|mitotic cell cycle phase transition|regulation of cyclin-dependent protein serine/threonine kinase activity
CSS0000188	-0.478867	0.859249	Down	LRK10L-1.1	LEAF RUST 10 DISEASE-RESISTANCE LOCUS RECEPTOR-LIKE PROTEIN KINASE-like 1.1	GO:0005886,GO:0005524,GO:0030247,GO:0106310,GO:0004674,GO:0006468	plasma membrane|ATP binding|polysaccharide binding|protein serine kinase activity|protein serine/threonine kinase activity|protein phosphorylation
CSS0000189	3.60091	0.132966	Up	ALMT14	Aluminum-activated malate transporter 14	GO:0009705,GO:0098656,GO:0015743	plant-type vacuole membrane|anion transmembrane transport|malate transport
CSS0000190	-0.572935	0.537978	Down		Pathogenesis-related leaf protein 4	GO:0005615,GO:0006952,GO:0009607	extracellular space|defense response|response to biotic stimulus	ko04016,ko04075,ko04626	MAPK signaling pathway - plant|Plant hormone signal transduction|Plant-pathogen interaction
CSS0000191	0.668753	0.277207	Up	At2g39020	Probable acetyltransferase NATA1-like	GO:0005829,GO:0008080	cytosol|N-acetyltransferase activity
CSS0000196	-0.170182	0.399202	Down
CSS0000198	1.03171	0.000275014	Up	ATPC	ATP synthase gamma chain, chloroplastic	GO:0009535,GO:0045261,GO:0046933	chloroplast thylakoid membrane|proton-transporting ATP synthase complex, catalytic core F(1)|proton-transporting ATP synthase activity, rotational mechanism	ko00190,ko00195	Oxidative phosphorylation|Photosynthesis
CSS0000199	-0.538567	0.0616722	Down
CSS0000203	1.39479	0.366743	Up	At2g33840	Tyrosine--tRNA ligase 1, cytoplasmic	GO:0005829,GO:0005524,GO:0004831,GO:0006418	cytosol|ATP binding|tyrosine-tRNA ligase activity|tRNA aminoacylation for protein translation	ko00970	Aminoacyl-tRNA biosynthesis
CSS0000204	-2.22775	2.1611e-06	Down	At2g19130	G-type lectin S-receptor-like serine/threonine-protein kinase At2g19130	GO:0005886,GO:0005524,GO:0005516,GO:0030246,GO:0106310,GO:0004674,GO:0031625,GO:0006468,GO:0048544	plasma membrane|ATP binding|calmodulin binding|carbohydrate binding|protein serine kinase activity|protein serine/threonine kinase activity|ubiquitin protein ligase binding|protein phosphorylation|recognition of pollen
CSS0000205	0.16647	0.614846	Up	ARF	ADP-ribosylation factor 2	GO:0005737,GO:0005794,GO:0005525,GO:0003924,GO:0006886,GO:0016192	cytoplasm|Golgi apparatus|GTP binding|GTPase activity|intracellular protein transport|vesicle-mediated transport	ko04144	Endocytosis
CSS0000206	0.588771	0.341518	Up	HO1	Heme oxygenase 1, chloroplastic	GO:0009507,GO:0020037,GO:0004392,GO:0046872,GO:0016117,GO:0071494,GO:0010019,GO:0009813,GO:0006788,GO:0015979,GO:0010024,GO:0010075,GO:0010119	chloroplast|heme binding|heme oxygenase (decyclizing) activity|metal ion binding|carotenoid biosynthetic process|cellular response to UV-C|chloroplast-nucleus signaling pathway|flavonoid biosynthetic process|heme oxidation|photosynthesis|phytochromobilin biosynthetic process|regulation of meristem growth|regulation of stomatal movement	ko00860	Porphyrin metabolism
CSS0000207	-1.20951	0.0251315	Down	CID12	Polyadenylate-binding protein-interacting protein 12	GO:0005634,GO:0003729,GO:0000166,GO:0003723	nucleus|mRNA binding|nucleotide binding|RNA binding
CSS0000208	-1.29265	0.00862749	Down	RMI1	RecQ-mediated genome instability protein 1	GO:0016604,GO:0031422,GO:0000166,GO:0000724,GO:0000712	nuclear body|RecQ family helicase-topoisomerase III complex|nucleotide binding|double-strand break repair via homologous recombination|resolution of meiotic recombination intermediates
CSS0000209	2.55803	0.0430671	Up	RALFL32	Protein RALF-like 32	GO:0048046,GO:0005179,GO:0019722,GO:0007267	apoplast|hormone activity|calcium-mediated signaling|cell-cell signaling
CSS0000210	2.4253	0.00254718	Up
CSS0000211	-0.330874	0.468737	Down
CSS0000212	0.179454	0.587461	Up	WRKY15	Probable WRKY transcription factor 15	GO:0005634,GO:0005516,GO:0003700,GO:0000976	nucleus|calmodulin binding|DNA-binding transcription factor activity|transcription cis-regulatory region binding
CSS0000214	0.207672	0.406423	Up	At3g59020	Importin beta-like SAD2 homolog	GO:0005829,GO:0005635,GO:0031267,GO:0006606	cytosol|nuclear envelope|small GTPase binding|protein import into nucleus	ko03013	Nucleocytoplasmic transport
CSS0000215	1.06987	0.406046	Up	CEP14	Precursor of CEP14	GO:0048046,GO:0005179,GO:0006995,GO:1902025,GO:2000280,GO:0010037,GO:0006970	apoplast|hormone activity|cellular response to nitrogen starvation|nitrate import|regulation of root development|response to carbon dioxide|response to osmotic stress
CSS0000218	3.60214	0.36093	Up	SBT5.6	Subtilisin-like protease SBT5.6	GO:0005576,GO:0004252,GO:0006508	extracellular region|serine-type endopeptidase activity|proteolysis
CSS0000219	1.61891	0.00180528	Up	SCPL27	Serine carboxypeptidase-like 27	GO:0005576,GO:0004185,GO:0006508	extracellular region|serine-type carboxypeptidase activity|proteolysis
CSS0000220	1.94587	0.269553	Up	MYB1	Transcription factor MYB1	GO:0005634,GO:0003677,GO:0031542,GO:0045893	nucleus|DNA binding|positive regulation of anthocyanin biosynthetic process|positive regulation of DNA-templated transcription
CSS0000221	0.586629	0.110978	Up	PQL3	PsbQ-like protein 3, chloroplastic	GO:0009507,GO:0009543,GO:0009535,GO:0019898,GO:0009654,GO:0005509,GO:0045156,GO:0009767,GO:0009409	chloroplast|chloroplast thylakoid lumen|chloroplast thylakoid membrane|extrinsic component of membrane|photosystem II oxygen evolving complex|calcium ion binding|electron transporter, transferring electrons within the cyclic electron transport pathway of photosynthesis activity|photosynthetic electron transport chain|response to cold
CSS0000223	7.43919	2.57639e-06	Up		(3S,6E)-nerolidol synthase 1	GO:0005829,GO:0000287,GO:0010333,GO:0016102	cytosol|magnesium ion binding|terpene synthase activity|diterpenoid biosynthetic process	ko00909	Sesquiterpenoid and triterpenoid biosynthesis
CSS0000224	3.84621	0.315576	Up		Stearoyl-[acyl-carrier-protein] 9-desaturase, chloroplastic	GO:0009507,GO:0045300,GO:0046872,GO:0102786,GO:0006633	chloroplast|acyl-[acyl-carrier-protein] desaturase activity|metal ion binding|stearoyl-[acp] desaturase activity|fatty acid biosynthetic process	ko00061,ko01040	Fatty acid biosynthesis|Biosynthesis of unsaturated fatty acids
CSS0000228	-0.428512	0.227334	Down
CSS0000230	0.507682	0.742898	Up	SLSG	S-locus-specific glycoprotein S13	GO:0060320	rejection of self pollen
CSS0000231	0.00911143	0.988713	Up	STY13	Serine/threonine-protein kinase STY13	GO:0005737,GO:0005524,GO:0004672,GO:0106310,GO:0004674,GO:0004712,GO:0004713,GO:0006468,GO:0045995,GO:0010344,GO:0007165	cytoplasm|ATP binding|protein kinase activity|protein serine kinase activity|protein serine/threonine kinase activity|protein serine/threonine/tyrosine kinase activity|protein tyrosine kinase activity|protein phosphorylation|regulation of embryonic development|seed oilbody biogenesis|signal transduction
CSS0000232	0.297715	0.558065	Up	PPR40	Putative pentatricopeptide repeat-containing protein At3g16890, mitochondrial	GO:0005739,GO:0042775,GO:0009737,GO:0006979,GO:0009651	mitochondrion|mitochondrial ATP synthesis coupled electron transport|response to abscisic acid|response to oxidative stress|response to salt stress
CSS0000233	3.49474	1.67107e-07	Up	DPBF2	ABSCISIC ACID-INSENSITIVE 5-like protein 1	GO:0005634,GO:0003700,GO:0000976,GO:0009738,GO:0045893	nucleus|DNA-binding transcription factor activity|transcription cis-regulatory region binding|abscisic acid-activated signaling pathway|positive regulation of DNA-templated transcription	ko04075	Plant hormone signal transduction
CSS0000234	2.75738	0.106983	Up
CSS0000235	4.80157	2.08007e-12	Up	IAA7	Auxin-responsive protein IAA7	GO:0005634,GO:0003700,GO:0000976,GO:0009734,GO:0009630,GO:0009733,GO:0009753,GO:0009414,GO:0009611	nucleus|DNA-binding transcription factor activity|transcription cis-regulatory region binding|auxin-activated signaling pathway|gravitropism|response to auxin|response to jasmonic acid|response to water deprivation|response to wounding	ko04075	Plant hormone signal transduction
CSS0000237	-0.514231	0.00719805	Down	PFK2	ATP-dependent 6-phosphofructokinase 2	GO:0005737,GO:0005829,GO:0003872,GO:0005524,GO:0046872,GO:0006002,GO:0006096	cytoplasm|cytosol|6-phosphofructokinase activity|ATP binding|metal ion binding|fructose 6-phosphate metabolic process|glycolytic process	ko00010,ko00030,ko00051,ko00052,ko03018	Glycolysis / Gluconeogenesis|Pentose phosphate pathway|Fructose and mannose metabolism|Galactose metabolism|RNA degradation
CSS0000239	-0.605834	0.105831	Down	SUA	SUPPRESSOR OF ABI3-5	GO:0005634,GO:0005681,GO:0046872,GO:0003723,GO:0006397,GO:0000398,GO:0043484	nucleus|spliceosomal complex|metal ion binding|RNA binding|mRNA processing|mRNA splicing, via spliceosome|regulation of RNA splicing
CSS0000240	0.269116	0.176289	Up
CSS0000241	0.596276	0.729383	Up	GRXS2	Monothiol glutaredoxin-S2	GO:0005737,GO:0051537,GO:0046872,GO:0000122	cytoplasm|2 iron, 2 sulfur cluster binding|metal ion binding|negative regulation of transcription by RNA polymerase II
CSS0000245	0.46057	0.651077	Up	HSA32	Protein HEAT-STRESS-ASSOCIATED 32	GO:0010286,GO:0010608,GO:0009408	heat acclimation|post-transcriptional regulation of gene expression|response to heat
CSS0000246	0.0169738	0.939218	Up
CSS0000247	0.447247	0.226152	Up	RABGAP22	Rab GTPase-activating protein 22	GO:0005634,GO:0005777,GO:0005096,GO:0006952	nucleus|peroxisome|GTPase activator activity|defense response
CSS0000248	-0.140105	0.477188	Down	SKIP1	F-box protein SKIP1	GO:0005634,GO:0019005,GO:0016567,GO:0031146	nucleus|SCF ubiquitin ligase complex|protein ubiquitination|SCF-dependent proteasomal ubiquitin-dependent protein catabolic process
CSS0000249	0.272391	0.45005	Up
CSS0000251	5.68958	4.37e-05	Up	PLP9	Probable inactive patatin-like protein 9	GO:0016298,GO:0016042	lipase activity|lipid catabolic process
CSS0000252	-0.0317468	0.976047	Down	At2g24240	BTB/POZ domain-containing protein At2g24240	GO:0051260,GO:0016567	protein homooligomerization|protein ubiquitination
CSS0000253	-0.302639	0.248269	Down	DHBK	Putative 3,4-dihydroxy-2-butanone kinase	GO:0005829,GO:0005524,GO:0004371,GO:0019563,GO:0016310	cytosol|ATP binding|glycerone kinase activity|glycerol catabolic process|phosphorylation
CSS0000256	4.10833	0.000579866	Up
CSS0000257	-0.00740315	0.988823	Down	CALS8	Putative callose synthase 8	GO:0000148,GO:0005886,GO:0003843,GO:0046527,GO:0006075,GO:0071555,GO:0008360	1,3-beta-D-glucan synthase complex|plasma membrane|1,3-beta-D-glucan synthase activity|glucosyltransferase activity|(1->3)-beta-D-glucan biosynthetic process|cell wall organization|regulation of cell shape
CSS0000258	-6.86293	6.81566e-06	Down	At3g47570	Probable LRR receptor-like serine/threonine-protein kinase At3g47570	GO:0005886,GO:0005524,GO:0106310,GO:0004674,GO:0006468	plasma membrane|ATP binding|protein serine kinase activity|protein serine/threonine kinase activity|protein phosphorylation
CSS0000259	-0.592376	0.263903	Down	CYP59	Peptidyl-prolyl cis-trans isomerase CYP59	GO:0005634,GO:0003755,GO:0003723,GO:0008270,GO:0000413,GO:1901407	nucleus|peptidyl-prolyl cis-trans isomerase activity|RNA binding|zinc ion binding|protein peptidyl-prolyl isomerization|regulation of phosphorylation of RNA polymerase II C-terminal domain
CSS0000260	-1.26095	0.00936516	Down	PGD2	6-phosphogluconate dehydrogenase, decarboxylating 2	GO:0009570,GO:0005829,GO:0005777,GO:0099503,GO:0050661,GO:0004616,GO:0046177,GO:0080173,GO:0009051	chloroplast stroma|cytosol|peroxisome|secretory vesicle|NADP binding|phosphogluconate dehydrogenase (decarboxylating) activity|D-gluconate catabolic process|male-female gamete recognition during double fertilization forming a zygote and endosperm|pentose-phosphate shunt, oxidative branch	ko00030,ko00480	Pentose phosphate pathway|Glutathione metabolism
CSS0000262	-0.816384	0.179165	Down	FLY2	Transmembrane E3 ubiquitin-protein ligase FLY2	GO:0012505,GO:0016020,GO:0046872,GO:0004842,GO:0009827	endomembrane system|membrane|metal ion binding|ubiquitin-protein transferase activity|plant-type cell wall modification
CSS0000264	-0.52985	0.489021	Down	CYP716A15	Beta-amyrin 28-monooxygenase	GO:0016020,GO:0020037,GO:0005506,GO:0004497,GO:0016491,GO:0016709,GO:0102374,GO:0102373,GO:0016135,GO:0016125	membrane|heme binding|iron ion binding|monooxygenase activity|oxidoreductase activity|oxidoreductase activity, acting on paired donors, with incorporation or reduction of molecular oxygen, NAD(P)H as one donor, and incorporation of one atom of oxygen|ursolic aldehyde 28-monooxygenase activity|uvaol dehydrogenase activity|saponin biosynthetic process|sterol metabolic process	ko00999	Biosynthesis of various plant secondary metabolites
CSS0000266	0.709459	0.712421	Up	BPM4	BTB/POZ and MATH domain-containing protein 4	GO:0005829,GO:0071472,GO:0042631,GO:0016567,GO:0006970	cytosol|cellular response to salt stress|cellular response to water deprivation|protein ubiquitination|response to osmotic stress
CSS0000267	0.142674	0.624761	Up	TIF3I1	Eukaryotic translation initiation factor 3 subunit I	GO:0080008,GO:0016282,GO:0033290,GO:0071541,GO:0003723,GO:0003743,GO:0002183,GO:0001732	Cul4-RING E3 ubiquitin ligase complex|eukaryotic 43S preinitiation complex|eukaryotic 48S preinitiation complex|eukaryotic translation initiation factor 3 complex, eIF3m|RNA binding|translation initiation factor activity|cytoplasmic translational initiation|formation of cytoplasmic translation initiation complex
CSS0000268	1.25274	0.0826709	Up	CYP707A2	Abscisic acid 8'-hydroxylase 2	GO:0016020,GO:0010295,GO:0020037,GO:0005506,GO:0004497,GO:0016491,GO:0046345,GO:0009687,GO:0048838,GO:0010114,GO:0009639,GO:0016125	membrane|(+)-abscisic acid 8'-hydroxylase activity|heme binding|iron ion binding|monooxygenase activity|oxidoreductase activity|abscisic acid catabolic process|abscisic acid metabolic process|release of seed from dormancy|response to red light|response to red or far red light|sterol metabolic process	ko00906	Carotenoid biosynthesis
CSS0000270	-0.686128	0.0613608	Down	At1g01500	Uncharacterized protein At1g01500	GO:0016020,GO:0004617	membrane|phosphoglycerate dehydrogenase activity
CSS0000271	-1.1346	0.0740406	Down	WAK2	Wall-associated receptor kinase 2	GO:0005634,GO:0005886,GO:0005524,GO:0005509,GO:0030247,GO:0106310,GO:0004674,GO:0007166,GO:0009992,GO:0009311,GO:0006468,GO:0009751,GO:0009826	nucleus|plasma membrane|ATP binding|calcium ion binding|polysaccharide binding|protein serine kinase activity|protein serine/threonine kinase activity|cell surface receptor signaling pathway|cellular water homeostasis|oligosaccharide metabolic process|protein phosphorylation|response to salicylic acid|unidimensional cell growth
CSS0000273	-0.00413074	0.997613	Down	CRSP	CO(2)-response secreted protease	GO:0048046,GO:0004252,GO:0008236,GO:0008240,GO:1900425,GO:2000122,GO:0006508,GO:2000038,GO:0010037	apoplast|serine-type endopeptidase activity|serine-type peptidase activity|tripeptidyl-peptidase activity|negative regulation of defense response to bacterium|negative regulation of stomatal complex development|proteolysis|regulation of stomatal complex development|response to carbon dioxide
CSS0000274	-0.541667	0.378005	Down	EMB1027	Arginine--tRNA ligase, chloroplastic/mitochondrial	GO:0009507,GO:0009570,GO:0005829,GO:0005739,GO:0004814,GO:0005524,GO:0006420,GO:0009793	chloroplast|chloroplast stroma|cytosol|mitochondrion|arginine-tRNA ligase activity|ATP binding|arginyl-tRNA aminoacylation|embryo development ending in seed dormancy	ko00970	Aminoacyl-tRNA biosynthesis
CSS0000275	1.547	0.0423217	Up	PILS6	Protein PIN-LIKES 6	GO:0005789,GO:0009734,GO:0080162,GO:0009733	endoplasmic reticulum membrane|auxin-activated signaling pathway|endoplasmic reticulum to cytosol auxin transport|response to auxin
CSS0000276	-1.4174	0.288636	Down	EXLB1	Expansin-like B1	GO:0005576,GO:0009653,GO:0019953	extracellular region|anatomical structure morphogenesis|sexual reproduction
CSS0000277	-0.450342	0.452779	Down	PPC6-7	Probable protein phosphatase 2C 73	GO:0005886,GO:0046872,GO:0017018,GO:0004722,GO:0009819,GO:0000226,GO:0045926,GO:0035970,GO:0006470	plasma membrane|metal ion binding|myosin phosphatase activity|protein serine/threonine phosphatase activity|drought recovery|microtubule cytoskeleton organization|negative regulation of growth|peptidyl-threonine dephosphorylation|protein dephosphorylation
CSS0000278	0.411572	0.409712	Up	ARL8A	ADP-ribosylation factor-like protein 8a	GO:0005737,GO:0005794,GO:0031902,GO:0005765,GO:0005634,GO:0000325,GO:0005886,GO:0009506,GO:0005819,GO:0005525,GO:0003924,GO:0051301,GO:0007059,GO:0051607,GO:0015031	cytoplasm|Golgi apparatus|late endosome membrane|lysosomal membrane|nucleus|plant-type vacuole|plasma membrane|plasmodesma|spindle|GTP binding|GTPase activity|cell division|chromosome segregation|defense response to virus|protein transport
CSS0000280	-0.375637	0.388383	Down
CSS0000281	-0.841949	0.00682098	Down		Calnexin homolog	GO:0005789,GO:0005509,GO:0030246,GO:0051082,GO:0006457,GO:0030433	endoplasmic reticulum membrane|calcium ion binding|carbohydrate binding|unfolded protein binding|protein folding|ubiquitin-dependent ERAD pathway	ko04141,ko04145	Protein processing in endoplasmic reticulum|Phagosome
CSS0000283	-0.0738754	0.805261	Down	PCMP-H60	Pentatricopeptide repeat-containing protein At2g27610	GO:0043231,GO:0003723,GO:0008270,GO:0009451	intracellular membrane-bounded organelle|RNA binding|zinc ion binding|RNA modification
CSS0000285	-1.33263	0.142151	Down	NIP1	NEP1-interacting protein 1	GO:0009535,GO:0046872	chloroplast thylakoid membrane|metal ion binding
CSS0000287	2.156	0.14252	Up	At5g38730	Pentatricopeptide repeat-containing protein At5g38730
CSS0000288	-0.0589273	0.773551	Down
CSS0000289	-0.263764	0.905134	Down	At2g20710	Pentatricopeptide repeat-containing protein At2g20710, mitochondrial	GO:0005739	mitochondrion
CSS0000293	5.62226	0.000908835	Up	TK1A	Thymidine kinase a	GO:0005737,GO:0005524,GO:0042802,GO:0046872,GO:0004797,GO:0071897,GO:0006302,GO:0016310,GO:0010225,GO:0046104	cytoplasm|ATP binding|identical protein binding|metal ion binding|thymidine kinase activity|DNA biosynthetic process|double-strand break repair|phosphorylation|response to UV-C|thymidine metabolic process	ko00240	Pyrimidine metabolism
CSS0000294	-0.369711	0.25155	Down	MPC1	Mitochondrial pyruvate carrier 1	GO:0005743,GO:0005739,GO:0000325,GO:0005886,GO:0009536,GO:0050833,GO:0006850,GO:0010119	mitochondrial inner membrane|mitochondrion|plant-type vacuole|plasma membrane|plastid|pyruvate transmembrane transporter activity|mitochondrial pyruvate transmembrane transport|regulation of stomatal movement
CSS0000295	0.470527	0.400176	Up	ARID5	AT-rich interactive domain-containing protein 5	GO:0005634,GO:0003677,GO:0006357	nucleus|DNA binding|regulation of transcription by RNA polymerase II
CSS0000296	0.0680459	0.848792	Up	At2g26790	Pentatricopeptide repeat-containing protein At2g26790, mitochondrial	GO:0005739	mitochondrion
CSS0000297	0.704525	0.1312	Up	AGO4	Protein argonaute 4	GO:0015030,GO:0005737,GO:0000791,GO:0005730,GO:0005654,GO:1990904,GO:0003682,GO:0004521,GO:0035198,GO:0003723,GO:0035197,GO:0042742,GO:0051607,GO:0006306,GO:0080188,GO:0031507,GO:0051567,GO:0019048,GO:0006417,GO:0031048,GO:0035194,GO:0030422	Cajal body|cytoplasm|euchromatin|nucleolus|nucleoplasm|ribonucleoprotein complex|chromatin binding|endoribonuclease activity|miRNA binding|RNA binding|siRNA binding|defense response to bacterium|defense response to virus|DNA methylation|gene silencing by RNA-directed DNA methylation|heterochromatin formation|histone H3-K9 methylation|modulation by virus of host process|regulation of translation|R…
CSS0000299	-1.354	0.000919179	Down	PIA2	Phytochrome-interacting ankyrin-repeat protein 2	GO:0005737,GO:0005739,GO:0005634,GO:0010313,GO:0009567,GO:0009553,GO:0080173,GO:0001933,GO:0031542,GO:0010218,GO:0009644,GO:0009744	cytoplasm|mitochondrion|nucleus|phytochrome binding|double fertilization forming a zygote and endosperm|embryo sac development|male-female gamete recognition during double fertilization forming a zygote and endosperm|negative regulation of protein phosphorylation|positive regulation of anthocyanin biosynthetic process|response to far red light|response to high light intensity|response to sucrose
CSS0000300	-0.901351	0.0777001	Down
CSS0000301	1.84252	0.000154878	Up	LYM1	LysM domain-containing GPI-anchored protein 1	GO:0005576,GO:0005634,GO:0005886,GO:0042834,GO:0006952,GO:0006955	extracellular region|nucleus|plasma membrane|peptidoglycan binding|defense response|immune response
CSS0000303	-0.00408201	0.989205	Down
CSS0000304	1.66497	4.13273e-08	Up	FAAH	Fatty acid amide hydrolase	GO:0005789,GO:0005886,GO:0047412,GO:0016042,GO:0070291	endoplasmic reticulum membrane|plasma membrane|N-(long-chain-acyl)ethanolamine deacylase activity|lipid catabolic process|N-acylethanolamine metabolic process
CSS0000305	0.0458303	0.82636	Up	ENY	Zinc finger protein ENHYDROUS	GO:0005634,GO:0003700,GO:0046872,GO:0000976,GO:0009740,GO:0006355,GO:0009937,GO:0010029,GO:0010431	nucleus|DNA-binding transcription factor activity|metal ion binding|transcription cis-regulatory region binding|gibberellic acid mediated signaling pathway|regulation of DNA-templated transcription|regulation of gibberellic acid mediated signaling pathway|regulation of seed germination|seed maturation
CSS0000307	3.76738	0.338847	Up	At1g53440	Probable LRR receptor-like serine/threonine-protein kinase At1g53440	GO:0005886,GO:0005524,GO:0106310,GO:0004674,GO:0006468	plasma membrane|ATP binding|protein serine kinase activity|protein serine/threonine kinase activity|protein phosphorylation
CSS0000308	0.35478	0.869812	Up
CSS0000309	-0.439717	0.050812	Down
CSS0000310	1.46716	0.213298	Up	CaMKMT	Calmodulin-lysine N-methyltransferase	GO:0005737,GO:0005634,GO:0018025,GO:0009738,GO:0009734,GO:0009630,GO:0032259,GO:0009787,GO:0010928,GO:1901000,GO:2000070,GO:2000280,GO:0009737,GO:0009733,GO:0009409,GO:0009408,GO:0002239,GO:0006970,GO:1902074,GO:0009651,GO:0080147	cytoplasm|nucleus|calmodulin-lysine N-methyltransferase activity|abscisic acid-activated signaling pathway|auxin-activated signaling pathway|gravitropism|methylation|regulation of abscisic acid-activated signaling pathway|regulation of auxin mediated signaling pathway|regulation of response to salt stress|regulation of response to water deprivation|regulation of root development|response to absci…	ko00310	Lysine degradation
CSS0000311	-0.551841	0.791014	Down
CSS0000312	0.424132	0.10859	Up	VIT_05s0020g02800	ATP-dependent (S)-NAD(P)H-hydrate dehydratase	GO:0005524,GO:0047453,GO:0110051,GO:0046496	ATP binding|ATP-dependent NAD(P)H-hydrate dehydratase activity|metabolite repair|nicotinamide nucleotide metabolic process
CSS0000313	0.265625	0.792047	Up
CSS0000314	0.298945	0.336694	Up	KEA4	K(+) efflux antiporter 4	GO:0000138,GO:0016020,GO:0015386	Golgi trans cisterna|membrane|potassium:proton antiporter activity
CSS0000316	3.42642	0.00854361	Up	CRK10	Cysteine-rich receptor-like protein kinase 10	GO:0005829,GO:0005886,GO:0005524,GO:0106310,GO:0004674,GO:0042742,GO:0006468	cytosol|plasma membrane|ATP binding|protein serine kinase activity|protein serine/threonine kinase activity|defense response to bacterium|protein phosphorylation
CSS0000317	-1.74553	0.0930013	Down	BRH1	Brassinosteroid-responsive RING protein 1	GO:0016020,GO:0061630,GO:0008270,GO:0009742,GO:0016567,GO:1901371,GO:1905421,GO:0009741,GO:0010200	membrane|ubiquitin protein ligase activity|zinc ion binding|brassinosteroid mediated signaling pathway|protein ubiquitination|regulation of leaf morphogenesis|regulation of plant organ morphogenesis|response to brassinosteroid|response to chitin
CSS0000318	-0.0439223	0.898221	Down
CSS0000320	0.0409634	0.974937	Up	At3g02060	ATP-dependent DNA helicase At3g02060, chloroplastic	GO:0009507,GO:0005524,GO:0016887,GO:0003677,GO:0004386	chloroplast|ATP binding|ATP hydrolysis activity|DNA binding|helicase activity
CSS0000321	-1.84218	0.387087	Down	GSH1	Glutamate--cysteine ligase, chloroplastic	GO:0009507,GO:0005524,GO:0004357,GO:0052544,GO:0042742,GO:0050832,GO:0002213,GO:0009908,GO:0019761,GO:0006750,GO:0009700,GO:0046686,GO:0009408,GO:0009753,GO:0010193	chloroplast|ATP binding|glutamate-cysteine ligase activity|defense response by callose deposition in cell wall|defense response to bacterium|defense response to fungus|defense response to insect|flower development|glucosinolate biosynthetic process|glutathione biosynthetic process|indole phytoalexin biosynthetic process|response to cadmium ion|response to heat|response to jasmonic acid|response t…	ko00270,ko00480	Cysteine and methionine metabolism|Glutathione metabolism
CSS0000323	0.464932	0.289581	Up	SMT2	24-methylenesterol C-methyltransferase 2	GO:0005783,GO:0005794,GO:0005634,GO:0030797,GO:0008757,GO:0032259,GO:0009825,GO:0032876,GO:0007389,GO:0016126,GO:0010051	endoplasmic reticulum|Golgi apparatus|nucleus|24-methylenesterol C-methyltransferase activity|S-adenosylmethionine-dependent methyltransferase activity|methylation|multidimensional cell growth|negative regulation of DNA endoreduplication|pattern specification process|sterol biosynthetic process|xylem and phloem pattern formation	ko00100	Steroid biosynthesis
CSS0000327	-0.179743	0.862469	Down	RPM1	Disease resistance protein RPM1	GO:0012505,GO:0031234,GO:0005886,GO:0043531,GO:0005524,GO:0000166,GO:0009626	endomembrane system|extrinsic component of cytoplasmic side of plasma membrane|plasma membrane|ADP binding|ATP binding|nucleotide binding|plant-type hypersensitive response	ko04626	Plant-pathogen interaction
CSS0000330	-0.824831	0.10723	Down
CSS0000332	0.515959	0.551782	Up		Triosephosphate isomerase, cytosolic	GO:0005737,GO:0004807,GO:0006094,GO:0006096	cytoplasm|triose-phosphate isomerase activity|gluconeogenesis|glycolytic process	ko00010,ko00051,ko00562,ko00710	Glycolysis / Gluconeogenesis|Fructose and mannose metabolism|Inositol phosphate metabolism|Carbon fixation in photosynthetic organisms
CSS0000333	3.18465	0.00304553	Up	ATHB-40	Homeobox-leucine zipper protein ATHB-40	GO:0005634,GO:0003700,GO:0000981,GO:0043565,GO:0000976,GO:0045893,GO:0009733	nucleus|DNA-binding transcription factor activity|DNA-binding transcription factor activity, RNA polymerase II-specific|sequence-specific DNA binding|transcription cis-regulatory region binding|positive regulation of DNA-templated transcription|response to auxin
CSS0000335	-1.64706	0.214943	Down	GA2OX1	Gibberellin 2-beta-dioxygenase 1	GO:0052634,GO:0046872,GO:0009686	C-19 gibberellin 2-beta-dioxygenase activity|metal ion binding|gibberellin biosynthetic process	ko00904	Diterpenoid biosynthesis
CSS0000336	-2.04633	0.0635739	Down	CAD6	Probable cinnamyl alcohol dehydrogenase 6	GO:0045551,GO:0016616,GO:0052747,GO:0008270,GO:0009809	cinnamyl-alcohol dehydrogenase activity|oxidoreductase activity, acting on the CH-OH group of donors, NAD or NADP as acceptor|sinapyl alcohol dehydrogenase activity|zinc ion binding|lignin biosynthetic process	ko00940	Phenylpropanoid biosynthesis
CSS0000337	0.465225	0.116189	Up	RPS12	40S ribosomal protein S12	GO:1990904,GO:0005840,GO:0003735,GO:0006412	ribonucleoprotein complex|ribosome|structural constituent of ribosome|translation	ko03010	Ribosome
CSS0000339	-0.194041	0.352183	Down
CSS0000342	3.27235	0.00280068	Up	At4g31140	Glucan endo-1,3-beta-glucosidase 5	GO:0005886,GO:0009506,GO:0005773,GO:0042973,GO:0005975,GO:0006952	plasma membrane|plasmodesma|vacuole|glucan endo-1,3-beta-D-glucosidase activity|carbohydrate metabolic process|defense response
CSS0000343	-0.256332	0.305349	Down	DEGP14	Putative protease Do-like 14	GO:0004222,GO:0004252,GO:0006508	metalloendopeptidase activity|serine-type endopeptidase activity|proteolysis
CSS0000344	0.249738	0.339964	Up	At5g42250	Alcohol dehydrogenase-like 7	GO:0005829,GO:0004024,GO:0051903,GO:0008270,GO:0046294	cytosol|alcohol dehydrogenase activity, zinc-dependent|S-(hydroxymethyl)glutathione dehydrogenase activity|zinc ion binding|formaldehyde catabolic process	ko00010,ko00620,ko00071,ko00350	Glycolysis / Gluconeogenesis|Pyruvate metabolism|Fatty acid degradation|Tyrosine metabolism
CSS0000345	0.108343	0.818501	Up	mnmE	Probable tRNA modification GTPase MnmE	GO:0009507,GO:0005525,GO:0003924,GO:0046872,GO:0006400	chloroplast|GTP binding|GTPase activity|metal ion binding|tRNA modification
CSS0000347	-0.439339	0.163727	Down	ITN1	Ankyrin repeat-containing protein ITN1	GO:0016020,GO:0005634,GO:0005886,GO:0009651	membrane|nucleus|plasma membrane|response to salt stress
CSS0000348	-0.414944	0.763636	Down	CAD	Probable mannitol dehydrogenase	GO:0046029,GO:0008270,GO:0071704	mannitol dehydrogenase activity|zinc ion binding|organic substance metabolic process	ko00902	Monoterpenoid biosynthesis
CSS0000349	-0.504563	0.0915398	Down
CSS0000350	0.993367	0.228283	Up	EMB2745	Pentatricopeptide repeat-containing protein At5g39710	GO:0005739	mitochondrion
CSS0000352	0.124934	0.884465	Up	CALS9	Callose synthase 9	GO:0000148,GO:0005829,GO:0005794,GO:0005886,GO:0003843,GO:0046527,GO:0006075,GO:0052543,GO:0048589,GO:0055047,GO:0009556,GO:0009555,GO:0009846,GO:0008360,GO:0080092	1,3-beta-D-glucan synthase complex|cytosol|Golgi apparatus|plasma membrane|1,3-beta-D-glucan synthase activity|glucosyltransferase activity|(1->3)-beta-D-glucan biosynthetic process|callose deposition in cell wall|developmental growth|generative cell mitosis|microsporogenesis|pollen development|pollen germination|regulation of cell shape|regulation of pollen tube growth	ko04141	Protein processing in endoplasmic reticulum
CSS0000353	-0.449027	0.027067	Down
CSS0000355	1.70389	0.000110774	Up	RPT2	Root phototropism protein 2	GO:0005737,GO:0005634,GO:0005777,GO:0009904,GO:0009638,GO:0016567,GO:0007165	cytoplasm|nucleus|peroxisome|chloroplast accumulation movement|phototropism|protein ubiquitination|signal transduction
CSS0000356	-0.797837	0.14285	Down	NOP5-2	Probable nucleolar protein 5-2	GO:0031428,GO:0005730,GO:0032040,GO:0003729,GO:0030515,GO:0042254	box C/D RNP complex|nucleolus|small-subunit processome|mRNA binding|snoRNA binding|ribosome biogenesis	ko03008	Ribosome biogenesis in eukaryotes
CSS0000357	3.54692	3.32259e-07	Up	IAA26	Auxin-responsive protein IAA26	GO:0005634,GO:0003700,GO:0042802,GO:0009734,GO:0009733	nucleus|DNA-binding transcription factor activity|identical protein binding|auxin-activated signaling pathway|response to auxin	ko04075	Plant hormone signal transduction
CSS0000359	-0.0240998	0.968611	Down
CSS0000360	-1.11186	0.342239	Down					ko03010	Ribosome
CSS0000362	-1.17109	0.0414124	Down	TIN1	Protein TUNICAMYCIN INDUCED 1	GO:0005783,GO:0030968,GO:0009555,GO:0010208	endoplasmic reticulum|endoplasmic reticulum unfolded protein response|pollen development|pollen wall assembly
CSS0000365	0.284205	0.713255	Up
CSS0000366	4.29188	0.274695	Up
CSS0000368	-1.15579	0.00698561	Down	Os04g0338000	Probable aldo-keto reductase 2	GO:0005737,GO:0004033	cytoplasm|aldo-keto reductase (NADP) activity
CSS0000369	-0.310919	0.324706	Down
CSS0000372	2.20995	3.08212e-05	Up
CSS0000373	-1.20714	0.131136	Down	CYP84A1	Cytochrome P450 84A1	GO:0005783,GO:0005886,GO:0020037,GO:0005506,GO:0004497,GO:0016705,GO:0009809,GO:0009699,GO:0010224	endoplasmic reticulum|plasma membrane|heme binding|iron ion binding|monooxygenase activity|oxidoreductase activity, acting on paired donors, with incorporation or reduction of molecular oxygen|lignin biosynthetic process|phenylpropanoid biosynthetic process|response to UV-B	ko00940	Phenylpropanoid biosynthesis
CSS0000374	-0.347414	0.494931	Down	FRO8	Ferric reduction oxidase 8, mitochondrial	GO:0031966,GO:0005739,GO:0005886,GO:0140618,GO:0000293,GO:0046872,GO:0006811	mitochondrial membrane|mitochondrion|plasma membrane|ferric-chelate reductase (NADH) activity|ferric-chelate reductase activity|metal ion binding|ion transport
CSS0000375	2.48777	1.8853e-06	Up	At5g67130	PI-PLC X domain-containing protein At5g67130	GO:0005886,GO:0009536,GO:0008081,GO:0006629	plasma membrane|plastid|phosphoric diester hydrolase activity|lipid metabolic process
CSS0000376	-0.13472	0.608833	Down	MLO3	MLO-like protein 3	GO:0016020,GO:0005516,GO:0006952,GO:0009607	membrane|calmodulin binding|defense response|response to biotic stimulus
CSS0000378	0.376038	0.616419	Up
CSS0000379	3.95264	0.0379679	Up	REV7	DNA polymerase zeta processivity subunit	GO:0005634,GO:0016035,GO:0006974,GO:0006281,GO:0010224	nucleus|zeta DNA polymerase complex|cellular response to DNA damage stimulus|DNA repair|response to UV-B
CSS0000380	-0.577325	0.0148262	Down	At1g03900	Uncharacterized protein At1g03900	GO:0030125,GO:0042626,GO:0006897,GO:0016192	clathrin vesicle coat|ATPase-coupled transmembrane transporter activity|endocytosis|vesicle-mediated transport
CSS0000381	-2.29259	0.382734	Down	PSK3	Phytosulfokines 3	GO:0031012,GO:0005576,GO:0005794,GO:0008083,GO:0030154,GO:0008283,GO:0071456	extracellular matrix|extracellular region|Golgi apparatus|growth factor activity|cell differentiation|cell population proliferation|cellular response to hypoxia
CSS0000382	0.339193	0.128445	Up	At1g65420	Ycf20-like protein	GO:0009507,GO:0016020,GO:0010196	chloroplast|membrane|nonphotochemical quenching
CSS0000384	-0.691206	0.000811334	Down	RCOM_1506700	Probable aspartyl aminopeptidase	GO:0005737,GO:0004177,GO:0008237,GO:0008270,GO:0006508	cytoplasm|aminopeptidase activity|metallopeptidase activity|zinc ion binding|proteolysis
CSS0000385	6.36396	5.59326e-08	Up	LNG1	Protein LONGIFOLIA 1	GO:0005829,GO:0005634,GO:0051513,GO:0009826	cytosol|nucleus|regulation of monopolar cell growth|unidimensional cell growth
CSS0000386	-0.694831	0.0550741	Down	UPL2	E3 ubiquitin-protein ligase UPL2	GO:0005737,GO:0005829,GO:0005739,GO:0061630,GO:0043161,GO:0000209,GO:0016567	cytoplasm|cytosol|mitochondrion|ubiquitin protein ligase activity|proteasome-mediated ubiquitin-dependent protein catabolic process|protein polyubiquitination|protein ubiquitination	ko04120	Ubiquitin mediated proteolysis
CSS0000387	0.262405	0.48978	Up	LIMYB	L10-interacting MYB domain-containing protein	GO:0005634	nucleus
CSS0000388	-0.212986	0.353816	Down	rpl20	50S ribosomal protein L20, chloroplastic	GO:0009507,GO:1990904,GO:0005840,GO:0019843,GO:0003735,GO:0000027,GO:0006412	chloroplast|ribonucleoprotein complex|ribosome|rRNA binding|structural constituent of ribosome|ribosomal large subunit assembly|translation	ko03010	Ribosome
CSS0000389	1.82297	0.236474	Up	UGT29	UDP-glucosyltransferase 29	GO:0008194,GO:0002238,GO:0016135,GO:0046246,GO:0016114	UDP-glycosyltransferase activity|response to molecule of fungal origin|saponin biosynthetic process|terpene biosynthetic process|terpenoid biosynthetic process
CSS0000390	-1.14839	0.138292	Down	ZAT11	Zinc finger protein ZAT11	GO:0005634,GO:0003700,GO:0046872,GO:0000976,GO:0071289,GO:0006355,GO:2000280,GO:0010200	nucleus|DNA-binding transcription factor activity|metal ion binding|transcription cis-regulatory region binding|cellular response to nickel ion|regulation of DNA-templated transcription|regulation of root development|response to chitin
CSS0000394	-0.171061	0.489917	Down	RHN1	Ras-related protein RHN1	GO:0005886,GO:0005525,GO:0003924,GO:0015031	plasma membrane|GTP binding|GTPase activity|protein transport	ko04144,ko04145,ko04148	Endocytosis|Phagosome|Efferocytosis
CSS0000396	-0.532131	0.442197	Down
CSS0000397	-0.871359	0.0321157	Down	UVR8	Ultraviolet-B receptor UVR8	GO:0000785,GO:0005829,GO:0005634,GO:0009536,GO:0003682,GO:0005085,GO:0042802,GO:0009881,GO:0042803,GO:0009649,GO:0009411,GO:0010224	chromatin|cytosol|nucleus|plastid|chromatin binding|guanyl-nucleotide exchange factor activity|identical protein binding|photoreceptor activity|protein homodimerization activity|entrainment of circadian clock|response to UV|response to UV-B
CSS0000398	-0.818087	0.035744	Down		Isocitrate dehydrogenase [NADP]	GO:0005739,GO:0004450,GO:0000287,GO:0051287,GO:0006097,GO:0006102,GO:0006739,GO:0006099	mitochondrion|isocitrate dehydrogenase (NADP+) activity|magnesium ion binding|NAD binding|glyoxylate cycle|isocitrate metabolic process|NADP metabolic process|tricarboxylic acid cycle	ko00020,ko00480,ko04146	Citrate cycle (TCA cycle)|Glutathione metabolism|Peroxisome
CSS0000400	0.0437938	0.903859	Up	GRP10	Glycine-rich RNA-binding protein 10	GO:0003723	RNA binding
CSS0000401	3.31182	0.0898872	Up	KIN7F	Kinesin-like protein KIN-7F	GO:0005874,GO:0005524,GO:0016887,GO:0008017,GO:0003777,GO:0007018	microtubule|ATP binding|ATP hydrolysis activity|microtubule binding|microtubule motor activity|microtubule-based movement	ko04814	Motor proteins
CSS0000402	-0.0589875	0.914701	Down	ELM1	Mitochondrial fission protein ELM1	GO:0005829,GO:0005741,GO:0000266,GO:0033365	cytosol|mitochondrial outer membrane|mitochondrial fission|protein localization to organelle
CSS0000403	-0.0378237	0.939681	Down		Protein transport protein Sec61 subunit alpha	GO:0005789,GO:0015031	endoplasmic reticulum membrane|protein transport	ko03060,ko04141,ko04145	Protein export|Protein processing in endoplasmic reticulum|Phagosome
CSS0000404	-0.318632	0.361195	Down	ACX3	Acyl-coenzyme A oxidase 3, peroxisomal	GO:0005576,GO:0005777,GO:0003997,GO:0071949,GO:0005504,GO:0050660,GO:0006635,GO:0033540,GO:0055088,GO:0051791	extracellular region|peroxisome|acyl-CoA oxidase activity|FAD binding|fatty acid binding|flavin adenine dinucleotide binding|fatty acid beta-oxidation|fatty acid beta-oxidation using acyl-CoA oxidase|lipid homeostasis|medium-chain fatty acid metabolic process	ko00640,ko00071,ko00592,ko01040,ko00410,ko04146	Propanoate metabolism|Fatty acid degradation|alpha-Linolenic acid metabolism|Biosynthesis of unsaturated fatty acids|beta-Alanine metabolism|Peroxisome
CSS0000405	0.562094	0.669807	Up
CSS0000406	0.464786	0.0587515	Up	CPI1	Cycloeucalenol cycloisomerase	GO:0016020,GO:0047793	membrane|cycloeucalenol cycloisomerase activity	ko00100	Steroid biosynthesis
CSS0000407	1.29874	0.136917	Up		Phosphoenolpyruvate carboxylase, housekeeping isozyme	GO:0005737,GO:0008964,GO:0015977,GO:0015979,GO:0006099	cytoplasm|phosphoenolpyruvate carboxylase activity|carbon fixation|photosynthesis|tricarboxylic acid cycle
CSS0000408	1.41209	0.196862	Up	BRH1	Brassinosteroid-responsive RING protein 1	GO:0016020,GO:0061630,GO:0008270,GO:0009742,GO:0016567,GO:1901371,GO:1905421,GO:0009741,GO:0010200	membrane|ubiquitin protein ligase activity|zinc ion binding|brassinosteroid mediated signaling pathway|protein ubiquitination|regulation of leaf morphogenesis|regulation of plant organ morphogenesis|response to brassinosteroid|response to chitin
CSS0000409	1.29385	0.575483	Up	LCD	L-cysteine desulfhydrase	GO:0080146,GO:0019450	L-cysteine desulfhydrase activity|L-cysteine catabolic process to pyruvate	ko00270	Cysteine and methionine metabolism
CSS0000411	4.44124	0.162584	Up	At1g65750	Putative ribonuclease H protein At1g65750	GO:0046872,GO:0003676,GO:0004523	metal ion binding|nucleic acid binding|RNA-DNA hybrid ribonuclease activity
CSS0000414	-0.438577	0.0530439	Down
CSS0000415	-0.0877864	0.838148	Down	PCMP-E17	Pentatricopeptide repeat-containing protein At4g14170	GO:0003723,GO:0009451	RNA binding|RNA modification
CSS0000417	0.553229	0.718473	Up
CSS0000418	-0.574089	0.0542865	Down
CSS0000420	-0.0269836	0.948058	Down	At5g40400	Pentatricopeptide repeat-containing protein At5g40400
CSS0000422	0.365419	0.615959	Up
CSS0000427	0.400628	0.237729	Up	CBSX1	CBS domain-containing protein CBSX1, chloroplastic	GO:0009507,GO:0045454	chloroplast|cell redox homeostasis
CSS0000431	-0.321878	0.0783338	Down
CSS0000433	-0.090262	0.769882	Down
CSS0000434	-0.911819	0.0107837	Down	VPS15	Serine/threonine-protein kinase VPS15	GO:0080008,GO:0005737,GO:0010008,GO:0005794,GO:0005770,GO:0071561,GO:0005942,GO:0034271,GO:0034272,GO:0005524,GO:0106310,GO:0004674,GO:0030242,GO:0045324,GO:0016236,GO:0048015,GO:0009555,GO:0009846,GO:0006468,GO:0006623	Cul4-RING E3 ubiquitin ligase complex|cytoplasm|endosome membrane|Golgi apparatus|late endosome|nucleus-vacuole junction|phosphatidylinositol 3-kinase complex|phosphatidylinositol 3-kinase complex, class III, type I|phosphatidylinositol 3-kinase complex, class III, type II|ATP binding|protein serine kinase activity|protein serine/threonine kinase activity|autophagy of peroxisome|late endosome to …	ko04136	Autophagy - other
CSS0000436	-0.389975	0.101705	Down	At1g52360	Coatomer subunit beta'-2	GO:0030126,GO:0000139,GO:0005198,GO:0006888,GO:0006891,GO:0006886,GO:0006890	COPI vesicle coat|Golgi membrane|structural molecule activity|endoplasmic reticulum to Golgi vesicle-mediated transport|intra-Golgi vesicle-mediated transport|intracellular protein transport|retrograde vesicle-mediated transport, Golgi to endoplasmic reticulum
CSS0000439	1.02502	0.0412811	Up	LCA1	Calcium-transporting ATPase, endoplasmic reticulum-type	GO:0005789,GO:0016020,GO:0005524,GO:0016887,GO:0046872,GO:0005388,GO:0015662,GO:0070588,GO:0006816,GO:0006874,GO:0034220	endoplasmic reticulum membrane|membrane|ATP binding|ATP hydrolysis activity|metal ion binding|P-type calcium transporter activity|P-type ion transporter activity|calcium ion transmembrane transport|calcium ion transport|cellular calcium ion homeostasis|ion transmembrane transport
CSS0000440	-1.67003	7.99996e-05	Down
CSS0000441	-0.00420657	0.99414	Down
CSS0000442	-0.65575	0.454817	Down	SRM1	Transcription factor SRM1	GO:0005634,GO:0003700,GO:0000976,GO:0009738,GO:1901001,GO:0010116,GO:1905615,GO:0045893,GO:0009787,GO:0006355,GO:1901371,GO:0009739,GO:0009751,GO:0009651,GO:0009414	nucleus|DNA-binding transcription factor activity|transcription cis-regulatory region binding|abscisic acid-activated signaling pathway|negative regulation of response to salt stress|positive regulation of abscisic acid biosynthetic process|positive regulation of developmental vegetative growth|positive regulation of DNA-templated transcription|regulation of abscisic acid-activated signaling path…
CSS0000443	0.484164	0.103664	Up		Spermidine synthase 1	GO:0004766,GO:0008295	spermidine synthase activity|spermidine biosynthetic process	ko00270,ko00330,ko00480	Cysteine and methionine metabolism|Arginine and proline metabolism|Glutathione metabolism
CSS0000444	-0.533625	0.107866	Down
CSS0000445	-0.000270675	0.999686	Down
CSS0000446	0.290699	0.542779	Up	FRK1	Fructokinase-1	GO:0005829,GO:0005524,GO:0008865,GO:0006000,GO:0019252	cytosol|ATP binding|fructokinase activity|fructose metabolic process|starch biosynthetic process
CSS0000449	0.508236	0.603671	Up	SD11	G-type lectin S-receptor-like serine/threonine-protein kinase SD1-1	GO:0005886,GO:0009506,GO:0005524,GO:0005516,GO:0030246,GO:0106310,GO:0004674,GO:0031625,GO:0006468,GO:0048544	plasma membrane|plasmodesma|ATP binding|calmodulin binding|carbohydrate binding|protein serine kinase activity|protein serine/threonine kinase activity|ubiquitin protein ligase binding|protein phosphorylation|recognition of pollen
CSS0000453	-0.0532209	0.798248	Down
CSS0000454	-3.97843	0.312675	Down	AP1M2	AP-1 complex subunit mu-2	GO:0030121,GO:0031410,GO:0031901,GO:0005634,GO:0005802,GO:0012510,GO:0035653,GO:0006886,GO:0006892,GO:0007034,GO:0016192	AP-1 adaptor complex|cytoplasmic vesicle|early endosome membrane|nucleus|trans-Golgi network|trans-Golgi network transport vesicle membrane|clathrin-coated vesicle cargo loading, AP-1-mediated|intracellular protein transport|post-Golgi vesicle-mediated transport|vacuolar transport|vesicle-mediated transport
CSS0000455	1.39608	0.00754233	Up	ERDJ3B	DnaJ protein ERDJ3B	GO:0005737,GO:0005829,GO:0005783,GO:0005788,GO:0051087,GO:0030544,GO:0051082,GO:0002221,GO:0042026	cytoplasm|cytosol|endoplasmic reticulum|endoplasmic reticulum lumen|chaperone binding|Hsp70 protein binding|unfolded protein binding|pattern recognition receptor signaling pathway|protein refolding
CSS0000456	-0.0132159	0.989632	Down					ko04016,ko04075,ko04626	MAPK signaling pathway - plant|Plant hormone signal transduction|Plant-pathogen interaction
CSS0000457	0.323881	0.398462	Up
CSS0000458	3.41812	0.00372997	Up	ANT	AP2-like ethylene-responsive transcription factor ANT	GO:0005634,GO:0003677,GO:0003700,GO:0000976,GO:0030154,GO:0051301,GO:0009908,GO:0019760,GO:0010492,GO:0010601,GO:0042127	nucleus|DNA binding|DNA-binding transcription factor activity|transcription cis-regulatory region binding|cell differentiation|cell division|flower development|glucosinolate metabolic process|maintenance of shoot apical meristem identity|positive regulation of auxin biosynthetic process|regulation of cell population proliferation
CSS0000459	0.00376203	0.99531	Up	TRX2	Thioredoxin H2	GO:0005829,GO:0005739,GO:0016671,GO:0016712,GO:0015035	cytosol|mitochondrion|oxidoreductase activity, acting on a sulfur group of donors, disulfide as acceptor|oxidoreductase activity, acting on paired donors, with incorporation or reduction of molecular oxygen, reduced flavin or flavoprotein as one donor, and incorporation of one atom of oxygen|protein-disulfide reductase activity
CSS0000460	-0.0100249	0.985769	Down	MSI2	WD-40 repeat-containing protein MSI2	GO:0080008,GO:0005634,GO:0042393,GO:0006338,GO:0006355	Cul4-RING E3 ubiquitin ligase complex|nucleus|histone binding|chromatin remodeling|regulation of DNA-templated transcription
CSS0000461	3.67865	5.37317e-05	Up	TED7	Protein TRACHEARY ELEMENT DIFFERENTIATION-RELATED 7A	GO:0005576,GO:0009505,GO:0005886,GO:0071555,GO:0009834,GO:2000652,GO:1905177	extracellular region|plant-type cell wall|plasma membrane|cell wall organization|plant-type secondary cell wall biogenesis|regulation of secondary cell wall biogenesis|tracheary element differentiation
CSS0000462	-0.4294	0.367276	Down	MBR2	E3 ubiquitin-protein ligase MBR2	GO:0046872,GO:0061630,GO:0009908,GO:0043161,GO:0010228	metal ion binding|ubiquitin protein ligase activity|flower development|proteasome-mediated ubiquitin-dependent protein catabolic process|vegetative to reproductive phase transition of meristem
CSS0000463	0.273582	0.848417	Up	CBP60A	Calmodulin-binding protein 60 A	GO:0005634,GO:0005516,GO:0003700,GO:0043565,GO:1900425,GO:0080142	nucleus|calmodulin binding|DNA-binding transcription factor activity|sequence-specific DNA binding|negative regulation of defense response to bacterium|regulation of salicylic acid biosynthetic process
CSS0000464	1.31859	0.486023	Up	MICU	Calcium uptake protein, mitochondrial	GO:0005758,GO:0005739,GO:1990246,GO:0005509,GO:0036444,GO:0006816,GO:0051560,GO:0051562	mitochondrial intermembrane space|mitochondrion|uniplex complex|calcium ion binding|calcium import into the mitochondrion|calcium ion transport|mitochondrial calcium ion homeostasis|negative regulation of mitochondrial calcium ion concentration
CSS0000465	-0.17438	0.356516	Down
CSS0000466	0.725413	0.0535315	Up	At2g19490	DNA repair protein recA homolog 3, mitochondrial	GO:0005739,GO:0005524,GO:0140664,GO:0003697,GO:0006310,GO:0006281	mitochondrion|ATP binding|ATP-dependent DNA damage sensor activity|single-stranded DNA binding|DNA recombination|DNA repair	ko03440	Homologous recombination
CSS0000467	4.52823	1.92111e-07	Up	Os02g0491600	Putative germin-like protein 2-1	GO:0048046,GO:0030145	apoplast|manganese ion binding
CSS0000468	0.168483	0.920155	Up	ARF2	Auxin response factor 2	GO:0005634,GO:0003700,GO:0043565,GO:0009734,GO:0010227,GO:0010047,GO:0010150,GO:0008285,GO:0045892,GO:0048481,GO:0009911,GO:1903288,GO:0009737	nucleus|DNA-binding transcription factor activity|sequence-specific DNA binding|auxin-activated signaling pathway|floral organ abscission|fruit dehiscence|leaf senescence|negative regulation of cell population proliferation|negative regulation of DNA-templated transcription|plant ovule development|positive regulation of flower development|positive regulation of potassium ion import across plasma …
CSS0000469	-0.712104	0.0398822	Down	ESP3	Pre-mRNA-splicing factor ATP-dependent RNA helicase DEAH1	GO:0016020,GO:0005634,GO:0005681,GO:0005524,GO:0016887,GO:0003723,GO:0003724,GO:0006397,GO:0008380,GO:0035194	membrane|nucleus|spliceosomal complex|ATP binding|ATP hydrolysis activity|RNA binding|RNA helicase activity|mRNA processing|RNA splicing|RNA-mediated post-transcriptional gene silencing	ko03040	Spliceosome
CSS0000471	0.35905	0.827103	Up	At3g28050	WAT1-related protein At3g28050	GO:0005886,GO:0022857	plasma membrane|transmembrane transporter activity
CSS0000472	-0.0618075	0.776287	Down	RPL27AC	60S ribosomal protein L27a-3	GO:0022625,GO:0022626,GO:0005739,GO:0009506,GO:0042788,GO:0003729,GO:0003735,GO:0006412	cytosolic large ribosomal subunit|cytosolic ribosome|mitochondrion|plasmodesma|polysomal ribosome|mRNA binding|structural constituent of ribosome|translation	ko03010	Ribosome
CSS0000473	0.204952	0.719125	Up
CSS0000474	3.74758	5.64854e-06	Up	BRG3	Probable BOI-related E3 ubiquitin-protein ligase 3	GO:0005634,GO:0046872,GO:0004842,GO:0006952,GO:0043161,GO:0043067	nucleus|metal ion binding|ubiquitin-protein transferase activity|defense response|proteasome-mediated ubiquitin-dependent protein catabolic process|regulation of programmed cell death
CSS0000475	0.23018	0.373651	Up	ALDH2B4	Aldehyde dehydrogenase family 2 member B4, mitochondrial	GO:0005829,GO:0005759,GO:0005739,GO:0004029,GO:0005524,GO:0043878	cytosol|mitochondrial matrix|mitochondrion|aldehyde dehydrogenase (NAD+) activity|ATP binding|glyceraldehyde-3-phosphate dehydrogenase (NAD+) (non-phosphorylating) activity	ko00010,ko00053,ko00620,ko00071,ko00561,ko00280,ko00310,ko00330,ko00340,ko00380,ko00410,ko00770	Glycolysis / Gluconeogenesis|Ascorbate and aldarate metabolism|Pyruvate metabolism|Fatty acid degradation|Glycerolipid metabolism|Valine, leucine and isoleucine degradation|Lysine degradation|Arginine and proline metabolism|Histidine metabolism|Tryptophan metabolism|beta-Alanine metabolism|Pantothenate and CoA biosynthesis
CSS0000478	3.81865	0.00901599	Up
CSS0000479	1.74439	1.4956e-06	Up	ATJ16	Chaperone protein dnaJ 16	GO:0016020,GO:0009737	membrane|response to abscisic acid
CSS0000482	7.19141	3.82997e-07	Up
CSS0000484	-0.00222969	0.994188	Down
CSS0000486	-0.218401	0.288259	Down	At3g46100	Histidine--tRNA ligase, chloroplastic/mitochondrial	GO:0009507,GO:0005739,GO:0005524,GO:0004821,GO:0006427	chloroplast|mitochondrion|ATP binding|histidine-tRNA ligase activity|histidyl-tRNA aminoacylation	ko00970	Aminoacyl-tRNA biosynthesis
CSS0000488	0.204434	0.855748	Up
CSS0000489	-0.285413	0.753774	Down
CSS0000490	-1.67736	0.217728	Down
CSS0000491	-0.968155	0.0155429	Down	POT10	Potassium transporter 10	GO:0016020,GO:0005886,GO:0015079,GO:0006813	membrane|plasma membrane|potassium ion transmembrane transporter activity|potassium ion transport
CSS0000492	-0.204939	0.285722	Down					ko03013	Nucleocytoplasmic transport
CSS0000493	4.10812	4.16516e-07	Up	NAKR1	Protein SODIUM POTASSIUM ROOT DEFECTIVE 1	GO:0005737,GO:0005783,GO:0005634,GO:0046872,GO:0009908,GO:0010233,GO:0010015,GO:0055078	cytoplasm|endoplasmic reticulum|nucleus|metal ion binding|flower development|phloem transport|root morphogenesis|sodium ion homeostasis
CSS0000494	0.342057	0.482326	Up	ABH1	Nuclear cap-binding protein subunit 1	GO:0005739,GO:0005845,GO:0005846,GO:0005634,GO:0003729,GO:0000339,GO:0006370,GO:1901527,GO:0000380,GO:0051607,GO:0048574,GO:0035195,GO:0006406,GO:0000398,GO:0042789,GO:0000956,GO:0000184,GO:0031053,GO:0009737,GO:0000394	mitochondrion|mRNA cap binding complex|nuclear cap binding complex|nucleus|mRNA binding|RNA cap binding|7-methylguanosine mRNA capping|abscisic acid-activated signaling pathway involved in stomatal movement|alternative mRNA splicing, via spliceosome|defense response to virus|long-day photoperiodism, flowering|miRNA-mediated gene silencing|mRNA export from nucleus|mRNA splicing, via spliceosome|mR…	ko03040,ko03013,ko03015	Spliceosome|Nucleocytoplasmic transport|mRNA surveillance pathway
CSS0000495	1.13306	0.00532225	Up	At1g74580	Putative pentatricopeptide repeat-containing protein At1g74580
CSS0000496	1.84608	0.0691872	Up
CSS0000498	-0.282081	0.43602	Down	CCB1	Protein COFACTOR ASSEMBLY OF COMPLEX C SUBUNIT B CCB1, chloroplastic	GO:0009507,GO:0009535,GO:0005829,GO:0010190	chloroplast|chloroplast thylakoid membrane|cytosol|cytochrome b6f complex assembly
CSS0000500	0.0114039	0.977679	Up	PCMP-H84	Putative pentatricopeptide repeat-containing protein At3g08820	GO:0003723,GO:0008270,GO:0009451	RNA binding|zinc ion binding|RNA modification
CSS0000501	-1.05042	0.698834	Down	RPM1	Disease resistance protein RPM1	GO:0012505,GO:0031234,GO:0005886,GO:0043531,GO:0005524,GO:0000166,GO:0009626	endomembrane system|extrinsic component of cytoplasmic side of plasma membrane|plasma membrane|ADP binding|ATP binding|nucleotide binding|plant-type hypersensitive response	ko04626	Plant-pathogen interaction
CSS0000502	-0.061593	0.942695	Down	SFH8	Phosphatidylinositol/phosphatidylcholine transfer protein SFH8	GO:0000139,GO:0005886,GO:0015031	Golgi membrane|plasma membrane|protein transport
CSS0000505	0.479504	0.532835	Up
CSS0000506	0.787363	0.482843	Up	CYP71AZ3	6,7,8-trihydroxycoumarin synthase	GO:0005783,GO:0016020,GO:0020037,GO:0005506,GO:0004497,GO:0016705,GO:0009805	endoplasmic reticulum|membrane|heme binding|iron ion binding|monooxygenase activity|oxidoreductase activity, acting on paired donors, with incorporation or reduction of molecular oxygen|coumarin biosynthetic process
CSS0000507	-0.318771	0.289989	Down		ADP-ribosylation factor 1	GO:0005737,GO:0005794,GO:0005525,GO:0003924,GO:0006886,GO:0016192	cytoplasm|Golgi apparatus|GTP binding|GTPase activity|intracellular protein transport|vesicle-mediated transport	ko04144	Endocytosis
CSS0000508	0.0149805	0.955304	Up
CSS0000509	0.109307	0.870275	Up	TET8	Tetraspanin-8	GO:0005794,GO:0005886,GO:0009506,GO:0005773,GO:0009734,GO:0050829	Golgi apparatus|plasma membrane|plasmodesma|vacuole|auxin-activated signaling pathway|defense response to Gram-negative bacterium
CSS0000513	0.138014	0.673688	Up
CSS0000515	-4.06857	0.144009	Down
CSS0000517	-3.49328	0.0112858	Down	CEY00_Acc04863	Endochitinase	GO:0008061,GO:0004568,GO:0016998,GO:0006032,GO:0006952,GO:0000272	chitin binding|chitinase activity|cell wall macromolecule catabolic process|chitin catabolic process|defense response|polysaccharide catabolic process	ko00520,ko04016	Amino sugar and nucleotide sugar metabolism|MAPK signaling pathway - plant
CSS0000521	0.323855	0.893683	Up	KRP1	Calcium-binding protein KRP1	GO:0005509,GO:0071456,GO:0009733	calcium ion binding|cellular response to hypoxia|response to auxin
CSS0000522	-2.11575	0.127415	Down
CSS0000523	-2.95786	0.0483945	Down	GRXS10	Monothiol glutaredoxin-S10	GO:0005737,GO:0005634,GO:0051537,GO:0046872,GO:0000122	cytoplasm|nucleus|2 iron, 2 sulfur cluster binding|metal ion binding|negative regulation of transcription by RNA polymerase II
CSS0000524	-0.114766	0.706489	Down	SEC13A	Protein transport protein SEC13 homolog A	GO:0030127,GO:0005783,GO:0005794,GO:0031080,GO:0005198,GO:0090114,GO:0006606	COPII vesicle coat|endoplasmic reticulum|Golgi apparatus|nuclear pore outer ring|structural molecule activity|COPII-coated vesicle budding|protein import into nucleus	ko03013,ko04141	Nucleocytoplasmic transport|Protein processing in endoplasmic reticulum
CSS0000525	0.783278	0.108622	Up	NHL12	NDR1/HIN1-like protein 12	GO:0005886,GO:0009506,GO:0098542	plasma membrane|plasmodesma|defense response to other organism
CSS0000526	-0.634331	0.58892	Down
CSS0000527	0.243354	0.28607	Up
CSS0000528	-0.214347	0.416203	Down	CYCT1-3	Cyclin-T1-3	GO:0008024,GO:0005634,GO:0061575,GO:0016538,GO:0007049,GO:0051301,GO:0032786,GO:0006357	cyclin/CDK positive transcription elongation factor complex|nucleus|cyclin-dependent protein serine/threonine kinase activator activity|cyclin-dependent protein serine/threonine kinase regulator activity|cell cycle|cell division|positive regulation of DNA-templated transcription, elongation|regulation of transcription by RNA polymerase II	ko03250	Viral life cycle - HIV-1
CSS0000531	0.51462	0.220151	Up	RPI2	Probable ribose-5-phosphate isomerase 2	GO:0005737,GO:0004751,GO:0008219,GO:0009052,GO:0010228	cytoplasm|ribose-5-phosphate isomerase activity|cell death|pentose-phosphate shunt, non-oxidative branch|vegetative to reproductive phase transition of meristem	ko00030,ko00710	Pentose phosphate pathway|Carbon fixation in photosynthetic organisms
CSS0000532	0.452164	0.0613789	Up	SR34	Serine/arginine-rich-splicing factor SR34	GO:0035061,GO:0016607,GO:0005634,GO:0005681,GO:0003729,GO:0003723,GO:0000398	interchromatin granule|nuclear speck|nucleus|spliceosomal complex|mRNA binding|RNA binding|mRNA splicing, via spliceosome	ko03040	Spliceosome
CSS0000533	-0.0844454	0.818542	Down
CSS0000534	1.6384	0.0475177	Up		Eukaryotic initiation factor 4A-3	GO:0005524,GO:0016887,GO:0003723,GO:0003724,GO:0003743	ATP binding|ATP hydrolysis activity|RNA binding|RNA helicase activity|translation initiation factor activity
CSS0000535	2.29314	0.011929	Up	TIG	Trigger factor-like protein TIG, Chloroplastic	GO:0009507,GO:0009941,GO:0009570,GO:0009536,GO:0003729,GO:0003755,GO:0044183,GO:0043022,GO:0051083,GO:0061077,GO:0015031,GO:0043335	chloroplast|chloroplast envelope|chloroplast stroma|plastid|mRNA binding|peptidyl-prolyl cis-trans isomerase activity|protein folding chaperone|ribosome binding|'de novo' cotranslational protein folding|chaperone-mediated protein folding|protein transport|protein unfolding
CSS0000536	0.382653	0.216291	Up	Os11g0706600	Thaumatin-like protein	GO:0006952	defense response
CSS0000537	1.16073	0.0620876	Up	OBGL	GTP-binding protein OBGC, chloroplastic	GO:0009507,GO:0009706,GO:0009570,GO:0005739,GO:0005525,GO:0003924,GO:0000287,GO:0003729,GO:0009658,GO:0009793,GO:0009416,GO:0006364,GO:0010027	chloroplast|chloroplast inner membrane|chloroplast stroma|mitochondrion|GTP binding|GTPase activity|magnesium ion binding|mRNA binding|chloroplast organization|embryo development ending in seed dormancy|response to light stimulus|rRNA processing|thylakoid membrane organization
CSS0000538	-0.0408179	0.935361	Down	mnmE	Probable tRNA modification GTPase MnmE	GO:0009507,GO:0005525,GO:0003924,GO:0046872,GO:0006400	chloroplast|GTP binding|GTPase activity|metal ion binding|tRNA modification
CSS0000540	-0.0673818	0.857483	Down	HVA22G	Putative HVA22-like protein g
CSS0000541	0.705641	0.190102	Up
CSS0000543	0.260364	0.325842	Up
CSS0000544	0.924699	0.574808	Up
CSS0000546	-0.614768	0.0539911	Down	ECT4	YTH domain-containing protein ECT4	GO:0005737,GO:0003729,GO:0061157	cytoplasm|mRNA binding|mRNA destabilization
CSS0000547	-0.413989	0.383572	Down	YchF1	Obg-like ATPase 1	GO:0005737,GO:0005829,GO:0005634,GO:0009506,GO:0005524,GO:0016887,GO:0005525,GO:0046872,GO:0043023,GO:0043022,GO:0006952,GO:1901001,GO:0009651	cytoplasm|cytosol|nucleus|plasmodesma|ATP binding|ATP hydrolysis activity|GTP binding|metal ion binding|ribosomal large subunit binding|ribosome binding|defense response|negative regulation of response to salt stress|response to salt stress
CSS0000550	0.00556002	0.983086	Up	DWF5	7-dehydrocholesterol reductase	GO:0005789,GO:0005794,GO:0005634,GO:0047598,GO:0016627,GO:0009918,GO:0016132,GO:0006695,GO:0016126,GO:0009826	endoplasmic reticulum membrane|Golgi apparatus|nucleus|7-dehydrocholesterol reductase activity|oxidoreductase activity, acting on the CH-CH group of donors|sterol delta7 reductase activity|brassinosteroid biosynthetic process|cholesterol biosynthetic process|sterol biosynthetic process|unidimensional cell growth	ko00100	Steroid biosynthesis
CSS0000551	0.363113	0.442859	Up	Os05g0239150	Zinc finger BED domain-containing protein RICESLEEPER 1	GO:0005634,GO:0003677,GO:0046872,GO:0046983,GO:0009791	nucleus|DNA binding|metal ion binding|protein dimerization activity|post-embryonic development
CSS0000554	-0.644721	0.454715	Down	UGT75L6	Crocetin glucosyltransferase, chloroplastic	GO:0009507,GO:0016758,GO:0008194	chloroplast|hexosyltransferase activity|UDP-glycosyltransferase activity
CSS0000555	-0.349373	0.385719	Down	ASK10	Shaggy-related protein kinase kappa	GO:0005737,GO:0005524,GO:0106310,GO:0004674,GO:0006468,GO:0007165	cytoplasm|ATP binding|protein serine kinase activity|protein serine/threonine kinase activity|protein phosphorylation|signal transduction
CSS0000556	3.9382	0.00239205	Up	AP1	Agamous-like MADS-box protein AP1	GO:0005634,GO:0000981,GO:0046983,GO:0000978,GO:0010582,GO:0045944,GO:0006357	nucleus|DNA-binding transcription factor activity, RNA polymerase II-specific|protein dimerization activity|RNA polymerase II cis-regulatory region sequence-specific DNA binding|floral meristem determinacy|positive regulation of transcription by RNA polymerase II|regulation of transcription by RNA polymerase II
CSS0000558	0.101327	0.89685	Up
CSS0000560	-0.231073	0.405418	Down	RPS28	40S ribosomal protein S28	GO:0022627,GO:0003735,GO:0030490,GO:0000028,GO:0006412	cytosolic small ribosomal subunit|structural constituent of ribosome|maturation of SSU-rRNA|ribosomal small subunit assembly|translation	ko03010	Ribosome
CSS0000561	1.09656	0.00219877	Up	PGDH2	D-3-phosphoglycerate dehydrogenase 2, chloroplastic	GO:0009507,GO:0009570,GO:0005634,GO:0051287,GO:0004617,GO:0006564	chloroplast|chloroplast stroma|nucleus|NAD binding|phosphoglycerate dehydrogenase activity|L-serine biosynthetic process	ko00260,ko00270	Glycine, serine and threonine metabolism|Cysteine and methionine metabolism
CSS0000562	0.415615	0.841479	Up	TLP1	Thaumatin-like protein 1	GO:0006952,GO:0009617,GO:0009723	defense response|response to bacterium|response to ethylene
CSS0000565	-0.673921	0.556865	Down	ORC6	Origin of replication complex subunit 6	GO:0005664,GO:0000808,GO:0003677,GO:0006260,GO:0006270,GO:0009555	nuclear origin of replication recognition complex|origin recognition complex|DNA binding|DNA replication|DNA replication initiation|pollen development
CSS0000566	-0.153656	0.728509	Down	At1g12390	Protein cornichon homolog 4	GO:0016020,GO:0016192	membrane|vesicle-mediated transport
CSS0000567	-0.475052	0.760221	Down
CSS0000568	0.0668185	0.863132	Up	TIFY8	Protein TIFY 8	GO:0005634,GO:0031347,GO:2000022,GO:0009611	nucleus|regulation of defense response|regulation of jasmonic acid mediated signaling pathway|response to wounding
CSS0000570	-0.175136	0.483265	Down	UBA2B	UBP1-associated protein 2B	GO:0005634,GO:0003729,GO:0008219,GO:0006952,GO:0009693,GO:0010150	nucleus|mRNA binding|cell death|defense response|ethylene biosynthetic process|leaf senescence	ko03040	Spliceosome
CSS0000571	0.805405	0.170462	Up	AUG3	AUGMIN subunit 3	GO:0070652,GO:0005874,GO:0072686,GO:0005634,GO:0009524,GO:0005819,GO:0051301,GO:0080175,GO:0051225	HAUS complex|microtubule|mitotic spindle|nucleus|phragmoplast|spindle|cell division|phragmoplast microtubule organization|spindle assembly
CSS0000573	1.11793	0.211124	Up					ko00790	Folate biosynthesis
CSS0000574	-0.298285	0.201252	Down	PSD	Exportin-T	GO:0005737,GO:0016363,GO:0005643,GO:0005049,GO:0031267,GO:0000049,GO:0009908,GO:0010014,GO:0006409,GO:0008033,GO:0071528	cytoplasm|nuclear matrix|nuclear pore|nuclear export signal receptor activity|small GTPase binding|tRNA binding|flower development|meristem initiation|tRNA export from nucleus|tRNA processing|tRNA re-export from nucleus	ko03013	Nucleocytoplasmic transport
CSS0000575	1.48241	0.000728625	Up
CSS0000577	0.0319299	0.94348	Up	ROS1	DNA glycosylase/AP lyase ROS1	GO:0005730,GO:0005634,GO:0051539,GO:0140078,GO:0003677,GO:0035514,GO:0019104,GO:0003906,GO:0046872,GO:0006284,GO:0050832,GO:0080111,GO:0006306,GO:0006281	nucleolus|nucleus|4 iron, 4 sulfur cluster binding|class I DNA-(apurinic or apyrimidinic site) endonuclease activity|DNA binding|DNA demethylase activity|DNA N-glycosylase activity|DNA-(apurinic or apyrimidinic site) endonuclease activity|metal ion binding|base-excision repair|defense response to fungus|DNA demethylation|DNA methylation|DNA repair
CSS0000578	0.560798	0.579436	Up	At3g14580	Pentatricopeptide repeat-containing protein At3g14580, mitochondrial	GO:0005739	mitochondrion
CSS0000580	-0.487689	0.0516162	Down					ko03040	Spliceosome
CSS0000582	0.247278	0.208861	Up	At4g04930	Sphingolipid delta(4)-desaturase DES1-like	GO:0005789,GO:0042284,GO:0046513,GO:0030148	endoplasmic reticulum membrane|sphingolipid delta-4 desaturase activity|ceramide biosynthetic process|sphingolipid biosynthetic process	ko00600	Sphingolipid metabolism
CSS0000586	2.3727	4.49259e-05	Up	AAP3	Amino acid permease 3	GO:0016020,GO:0031965,GO:0005886,GO:0015171,GO:0015174,GO:0015293,GO:0003333,GO:0015802,GO:0006952	membrane|nuclear membrane|plasma membrane|amino acid transmembrane transporter activity|basic amino acid transmembrane transporter activity|symporter activity|amino acid transmembrane transport|basic amino acid transport|defense response
CSS0000587	-0.0665265	0.74448	Down	ARID4	AT-rich interactive domain-containing protein 4	GO:0005634,GO:0003677,GO:0046872	nucleus|DNA binding|metal ion binding
CSS0000590	-1.83261	0.00152975	Down	ERDJ3A	DnaJ protein ERDJ3A	GO:0005788,GO:0009506,GO:0016491,GO:0034605,GO:0009860,GO:0009408	endoplasmic reticulum lumen|plasmodesma|oxidoreductase activity|cellular response to heat|pollen tube growth|response to heat
CSS0000597	-0.545111	0.115888	Down	BPA1	Binding partner of ACD11 1	GO:0005886,GO:0009536,GO:0003723,GO:0050832,GO:0034051	plasma membrane|plastid|RNA binding|defense response to fungus|negative regulation of plant-type hypersensitive response
CSS0000599	-0.19011	0.500471	Down
CSS0000600	0.586048	0.0123326	Up	HEXO1	Beta-hexosaminidase 1	GO:0016020,GO:0000325,GO:0099503,GO:0005773,GO:0004563,GO:0015929,GO:0102148,GO:0005975,GO:0030203	membrane|plant-type vacuole|secretory vesicle|vacuole|beta-N-acetylhexosaminidase activity|hexosaminidase activity|N-acetyl-beta-D-galactosaminidase activity|carbohydrate metabolic process|glycosaminoglycan metabolic process	ko00520,ko00600,ko00513,ko00531,ko00603,ko00604,ko00511	Amino sugar and nucleotide sugar metabolism|Sphingolipid metabolism|Various types of N-glycan biosynthesis|Glycosaminoglycan degradation|Glycosphingolipid biosynthesis - globo and isoglobo series|Glycosphingolipid biosynthesis - ganglio series|Other glycan degradation
CSS0000601	2.79458	2.20588e-05	Up	TIP2-1	Aquaporin TIP2-1	GO:0042807,GO:0009941,GO:0005794,GO:0016020,GO:0009505,GO:0000325,GO:0009705,GO:0005886,GO:0009506,GO:0000326,GO:0042802,GO:0015200,GO:0015250,GO:0006833	central vacuole|chloroplast envelope|Golgi apparatus|membrane|plant-type cell wall|plant-type vacuole|plant-type vacuole membrane|plasma membrane|plasmodesma|protein storage vacuole|identical protein binding|methylammonium transmembrane transporter activity|water channel activity|water transport
CSS0000602	-2.44857	0.0314183	Down	SARD1	Protein SAR DEFICIENT 1	GO:0005634,GO:0003700,GO:0043565,GO:0071219,GO:0042742,GO:0002229,GO:0009626,GO:1900426,GO:0006355,GO:0080142,GO:0010112,GO:0009617,GO:0010224	nucleus|DNA-binding transcription factor activity|sequence-specific DNA binding|cellular response to molecule of bacterial origin|defense response to bacterium|defense response to oomycetes|plant-type hypersensitive response|positive regulation of defense response to bacterium|regulation of DNA-templated transcription|regulation of salicylic acid biosynthetic process|regulation of systemic acquir…
CSS0000603	-0.0206303	0.944586	Down	UKL1	Uridine/cytidine kinase UKL1, chloroplastic	GO:0009507,GO:0005737,GO:0005524,GO:0016757,GO:0005525,GO:0004849,GO:0044211,GO:0016310,GO:2000904,GO:0044206	chloroplast|cytoplasm|ATP binding|glycosyltransferase activity|GTP binding|uridine kinase activity|CTP salvage|phosphorylation|regulation of starch metabolic process|UMP salvage	ko00240	Pyrimidine metabolism
CSS0000605	0.3207	0.407285	Up	OFUT23	O-fucosyltransferase 23	GO:0000139,GO:0016757,GO:0006004,GO:0009875,GO:0009856	Golgi membrane|glycosyltransferase activity|fucose metabolic process|pollen-pistil interaction|pollination
CSS0000606	-0.173686	0.608453	Down
CSS0000607	-0.713766	0.198632	Down	ACLB-2	ATP-citrate synthase beta chain protein 2	GO:0140615,GO:0005829,GO:0005524,GO:0003878,GO:0046872,GO:0006085,GO:0006633,GO:0006099	ATP-dependent citrate lyase complex|cytosol|ATP binding|ATP citrate synthase activity|metal ion binding|acetyl-CoA biosynthetic process|fatty acid biosynthetic process|tricarboxylic acid cycle	ko00020	Citrate cycle (TCA cycle)
CSS0000609	1.10317	0.1216	Up
CSS0000610	-0.388018	0.284221	Down	PYL8	Abscisic acid receptor PYL8	GO:0005737,GO:0005829,GO:0005634,GO:0005886,GO:0010427,GO:0042803,GO:0004864,GO:0038023,GO:0009738,GO:0009789,GO:0080163,GO:0009737	cytoplasm|cytosol|nucleus|plasma membrane|abscisic acid binding|protein homodimerization activity|protein phosphatase inhibitor activity|signaling receptor activity|abscisic acid-activated signaling pathway|positive regulation of abscisic acid-activated signaling pathway|regulation of protein serine/threonine phosphatase activity|response to abscisic acid	ko04016,ko04075	MAPK signaling pathway - plant|Plant hormone signal transduction
CSS0000612	-2.06481	0.10415	Down	RAPTOR1	Regulatory-associated protein of TOR 1	GO:0005737,GO:0031931,GO:0030674,GO:0071230,GO:0009267,GO:0030307,GO:0071902,GO:0010506,GO:0031929	cytoplasm|TORC1 complex|protein-macromolecule adaptor activity|cellular response to amino acid stimulus|cellular response to starvation|positive regulation of cell growth|positive regulation of protein serine/threonine kinase activity|regulation of autophagy|TOR signaling	ko04136	Autophagy - other
CSS0000613	4.00337	6.26467e-13	Up	At1g07650	Probable LRR receptor-like serine/threonine-protein kinase At1g07650	GO:0005886,GO:0005524,GO:0106310,GO:0004674,GO:0006468	plasma membrane|ATP binding|protein serine kinase activity|protein serine/threonine kinase activity|protein phosphorylation
CSS0000614	-0.0219005	0.954623	Down	HO1	Heme oxygenase 1, chloroplastic	GO:0009507,GO:0020037,GO:0004392,GO:0046872,GO:0016117,GO:0071494,GO:0010019,GO:0009813,GO:0006788,GO:0015979,GO:0010024,GO:0010075,GO:0010119	chloroplast|heme binding|heme oxygenase (decyclizing) activity|metal ion binding|carotenoid biosynthetic process|cellular response to UV-C|chloroplast-nucleus signaling pathway|flavonoid biosynthetic process|heme oxidation|photosynthesis|phytochromobilin biosynthetic process|regulation of meristem growth|regulation of stomatal movement	ko00860	Porphyrin metabolism
CSS0000616	-0.799932	0.0687961	Down	SR30	Serine/arginine-rich splicing factor SR30	GO:0005829,GO:0016607,GO:0005634,GO:0005681,GO:0003723,GO:0000398	cytosol|nuclear speck|nucleus|spliceosomal complex|RNA binding|mRNA splicing, via spliceosome	ko03040	Spliceosome
CSS0000618	-0.138262	0.61283	Down	At1g71900	Probable magnesium transporter NIPA4	GO:0005769,GO:0016020,GO:0005886,GO:0015095,GO:0015693	early endosome|membrane|plasma membrane|magnesium ion transmembrane transporter activity|magnesium ion transport
CSS0000623	1.32185	0.200985	Up	LOB	Protein LATERAL ORGAN BOUNDARIES	GO:0000976,GO:0010199	transcription cis-regulatory region binding|organ boundary specification between lateral organs and the meristem
CSS0000624	-5.93188	0.129779	Down	tm-2	ToMV susceptible protein tm-2	GO:0005886,GO:0043531,GO:0005524,GO:0098542	plasma membrane|ADP binding|ATP binding|defense response to other organism
CSS0000625	-2.10154	0.341934	Down
CSS0000626	-0.14644	0.673305	Down	FER	Receptor-like protein kinase FERONIA	GO:0043680,GO:0005886,GO:0009506,GO:0005524,GO:0004672,GO:0106310,GO:0004674,GO:0009738,GO:0009742,GO:0032922,GO:0050832,GO:0009873,GO:0009788,GO:0030308,GO:0010483,GO:0009791,GO:0046777,GO:0009741,GO:0009723,GO:0048364,GO:0010118	filiform apparatus|plasma membrane|plasmodesma|ATP binding|protein kinase activity|protein serine kinase activity|protein serine/threonine kinase activity|abscisic acid-activated signaling pathway|brassinosteroid mediated signaling pathway|circadian regulation of gene expression|defense response to fungus|ethylene-activated signaling pathway|negative regulation of abscisic acid-activated signalin…
CSS0000627	0.383648	0.370876	Up
CSS0000628	-0.0520655	0.93727	Down	CKL3	Casein kinase 1-like protein 3	GO:0005737,GO:0005634,GO:0005524,GO:0106310,GO:0004674,GO:0009785,GO:0006897,GO:0018105,GO:0009640,GO:0009637,GO:0007165	cytoplasm|nucleus|ATP binding|protein serine kinase activity|protein serine/threonine kinase activity|blue light signaling pathway|endocytosis|peptidyl-serine phosphorylation|photomorphogenesis|response to blue light|signal transduction
CSS0000629	3.30707	0.266065	Up	HIPP21	Heavy metal-associated isoprenylated plant protein 21	GO:0016020,GO:0046872,GO:0055073,GO:0071585	membrane|metal ion binding|cadmium ion homeostasis|detoxification of cadmium ion
CSS0000630	0.611157	0.340889	Up
CSS0000631	-0.13743	0.627398	Down	PAM71-HL	Protein PAM71-homolog, chloroplastic	GO:0009507,GO:0009941,GO:0009706,GO:0005794,GO:0015085,GO:0005384,GO:0046873,GO:0070588,GO:0019722,GO:0032468,GO:0032472,GO:0071421	chloroplast|chloroplast envelope|chloroplast inner membrane|Golgi apparatus|calcium ion transmembrane transporter activity|manganese ion transmembrane transporter activity|metal ion transmembrane transporter activity|calcium ion transmembrane transport|calcium-mediated signaling|Golgi calcium ion homeostasis|Golgi calcium ion transport|manganese ion transmembrane transport
CSS0000634	0.434789	0.569953	Up	CLC-B	Chloride channel protein CLC-b	GO:0034707,GO:0043231,GO:0009705,GO:0009671,GO:0005247,GO:0034765	chloride channel complex|intracellular membrane-bounded organelle|plant-type vacuole membrane|nitrate:proton symporter activity|voltage-gated chloride channel activity|regulation of ion transmembrane transport
CSS0000635	2.79391	7.22984e-05	Up	At1g67720	Probable LRR receptor-like serine/threonine-protein kinase At1g67720	GO:0016020,GO:0005524,GO:0106310,GO:0004674,GO:0006468	membrane|ATP binding|protein serine kinase activity|protein serine/threonine kinase activity|protein phosphorylation
CSS0000636	0.138144	0.613755	Up
CSS0000639	0.215785	0.401438	Up	WLIM1	LIM domain-containing protein WLIM1	GO:0005737,GO:0005856,GO:0005886,GO:0051015,GO:0046872,GO:0003729,GO:0051017	cytoplasm|cytoskeleton|plasma membrane|actin filament binding|metal ion binding|mRNA binding|actin filament bundle assembly
CSS0000641	0.284493	0.888379	Up	RLP1	Receptor-like protein 1	GO:0005886,GO:0042742,GO:0045087	plasma membrane|defense response to bacterium|innate immune response
CSS0000642	6.38778	2.63932e-18	Up	RTNLB21	Reticulon-like protein B21	GO:0005789	endoplasmic reticulum membrane
CSS0000643	1.56236	0.255894	Up
CSS0000644	0.721258	0.0535285	Up	GMGT1	Galactomannan galactosyltransferase 1	GO:0000139,GO:0016757,GO:0071555	Golgi membrane|glycosyltransferase activity|cell wall organization
CSS0000645	-0.0589935	0.807594	Down	RPL7A-1	60S ribosomal protein L7a-1	GO:1990904,GO:0005840,GO:0042254	ribonucleoprotein complex|ribosome|ribosome biogenesis	ko03010	Ribosome
CSS0000646	0.494709	0.611956	Up	SUMM2	Disease resistance protein SUMM2	GO:0043531,GO:0005524,GO:0006952	ADP binding|ATP binding|defense response
CSS0000647	-0.0509628	0.93096	Down	ERF053	Ethylene-responsive transcription factor ERF053	GO:0005737,GO:0005634,GO:0003700,GO:0043565,GO:0000976,GO:0009873,GO:1900036,GO:0045893,GO:2000070,GO:0009651	cytoplasm|nucleus|DNA-binding transcription factor activity|sequence-specific DNA binding|transcription cis-regulatory region binding|ethylene-activated signaling pathway|positive regulation of cellular response to heat|positive regulation of DNA-templated transcription|regulation of response to water deprivation|response to salt stress
CSS0000649	-0.113292	0.542835	Down	SCD1	DENN domain and WD repeat-containing protein SCD1	GO:0030136,GO:0080008,GO:0031410,GO:0005886,GO:0000911,GO:0010235,GO:0009825,GO:0045824,GO:0032483	clathrin-coated vesicle|Cul4-RING E3 ubiquitin ligase complex|cytoplasmic vesicle|plasma membrane|cytokinesis by cell plate formation|guard mother cell cytokinesis|multidimensional cell growth|negative regulation of innate immune response|regulation of Rab protein signal transduction
CSS0000650	0.373583	0.307779	Up	NLP6	Protein NLP6	GO:0005634,GO:0003700,GO:0000976	nucleus|DNA-binding transcription factor activity|transcription cis-regulatory region binding
CSS0000651	-0.344614	0.369726	Down	SUVH2	Histone-lysine N-methyltransferase family member SUVH2	GO:0000775,GO:0000792,GO:0005634,GO:0003690,GO:0018024,GO:0042054,GO:0008270,GO:0040029,GO:0080188,GO:0034968,GO:0016571	chromosome, centromeric region|heterochromatin|nucleus|double-stranded DNA binding|histone lysine N-methyltransferase activity|histone methyltransferase activity|zinc ion binding|epigenetic regulation of gene expression|gene silencing by RNA-directed DNA methylation|histone lysine methylation|histone methylation
CSS0000653	-0.448837	0.483097	Down	GRF12	Growth-regulating factor 12	GO:0005634,GO:0005524,GO:0032502,GO:0006351,GO:0006355	nucleus|ATP binding|developmental process|DNA-templated transcription|regulation of DNA-templated transcription
CSS0000655	5.67065	0.000702285	Up	TUBA	Tubulin alpha chain	GO:0005737,GO:0005874,GO:0005525,GO:0016787,GO:0046872,GO:0005200,GO:0007017	cytoplasm|microtubule|GTP binding|hydrolase activity|metal ion binding|structural constituent of cytoskeleton|microtubule-based process	ko04145,ko04814	Phagosome|Motor proteins
CSS0000656	0.0409728	0.939221	Up	ATPC	ATP synthase gamma chain, chloroplastic	GO:0009535,GO:0000275,GO:0046933,GO:0015986	chloroplast thylakoid membrane|mitochondrial proton-transporting ATP synthase complex, catalytic sector F(1)|proton-transporting ATP synthase activity, rotational mechanism|proton motive force-driven ATP synthesis	ko00190,ko00195	Oxidative phosphorylation|Photosynthesis
CSS0000657	0.268271	0.35395	Up
CSS0000660	1.6681	0.281126	Up	UPL1	E3 ubiquitin-protein ligase UPL1	GO:0005737,GO:0005829,GO:0005739,GO:0005634,GO:0009506,GO:0000151,GO:0061630,GO:0004842,GO:0043161,GO:0000209,GO:0016567	cytoplasm|cytosol|mitochondrion|nucleus|plasmodesma|ubiquitin ligase complex|ubiquitin protein ligase activity|ubiquitin-protein transferase activity|proteasome-mediated ubiquitin-dependent protein catabolic process|protein polyubiquitination|protein ubiquitination
CSS0000662	-1.82804	0.00225252	Down	PARC	Probable glutathione S-transferase parC	GO:0005737,GO:0004364,GO:0009734,GO:0006749	cytoplasm|glutathione transferase activity|auxin-activated signaling pathway|glutathione metabolic process	ko00480	Glutathione metabolism
CSS0000663	0.42974	0.638107	Up	OBL1	Triacylglycerol lipase OBL1	GO:0005811,GO:0016020,GO:0004806,GO:0016042	lipid droplet|membrane|triglyceride lipase activity|lipid catabolic process
CSS0000664	1.24452	0.42831	Up	MBD7	Methyl-CpG-binding domain-containing protein 7	GO:0010369,GO:0005694,GO:0005634,GO:0019899,GO:0008327,GO:1901537	chromocenter|chromosome|nucleus|enzyme binding|methyl-CpG binding|positive regulation of DNA demethylation
CSS0000665	-0.792193	0.065256	Down
CSS0000666	-0.837835	0.194129	Down	TAR4	Tryptophan aminotransferase-related protein 4	GO:0016020,GO:0016846,GO:0008483,GO:0006520	membrane|carbon-sulfur lyase activity|transaminase activity|amino acid metabolic process
CSS0000667	0.529615	0.682313	Up					ko00260,ko00330,ko00470,ko04146	Glycine, serine and threonine metabolism|Arginine and proline metabolism|D-Amino acid metabolism|Peroxisome
CSS0000669	0.302689	0.471048	Up	TL17	Thylakoid lumenal 17.4 kDa protein, chloroplastic	GO:0009543	chloroplast thylakoid lumen
CSS0000670	0.0605275	0.903139	Up	TIM8	Mitochondrial import inner membrane translocase subunit TIM8	GO:0005829,GO:0005758,GO:0005739,GO:0009536,GO:0046872,GO:0015031	cytosol|mitochondrial intermembrane space|mitochondrion|plastid|metal ion binding|protein transport
CSS0000671	-1.16626	0.222739	Down	At4g28920	UPF0725 protein At4g28920
CSS0000672	-1.31547	0.0412749	Down	DFR	Dihydroflavonol 4-reductase	GO:0045552,GO:0047890,GO:0009718	dihydrokaempferol 4-reductase activity|flavanone 4-reductase activity|anthocyanin-containing compound biosynthetic process	ko00941	Flavonoid biosynthesis
CSS0000675	0.489974	0.400672	Up	At1g65420	Ycf20-like protein	GO:0009507,GO:0016020,GO:0010196	chloroplast|membrane|nonphotochemical quenching
CSS0000676	-0.209519	0.472415	Down
CSS0000677	-1.63214	0.121543	Down	RGTA2	Geranylgeranyl transferase type-2 subunit alpha 2	GO:0005737,GO:0005968,GO:0004663,GO:0018344	cytoplasm|Rab-protein geranylgeranyltransferase complex|Rab geranylgeranyltransferase activity|protein geranylgeranylation
CSS0000678	-0.2662	0.63278	Down	VIP2	Probable NOT transcription complex subunit VIP2 (Fragment)	GO:0030015,GO:0005634,GO:0015074,GO:0006355	CCR4-NOT core complex|nucleus|DNA integration|regulation of DNA-templated transcription	ko03018	RNA degradation
CSS0000679	5.25952	0.000534354	Up	EXPA1	Expansin-A1	GO:0005576,GO:0016020,GO:0009653,GO:0009664	extracellular region|membrane|anatomical structure morphogenesis|plant-type cell wall organization
CSS0000680	1.44969	0.000379113	Up
CSS0000682	-0.524245	0.25966	Down		Nucleoside diphosphate kinase 1	GO:0005524,GO:0046872,GO:0004550,GO:0006241,GO:0006183,GO:0006165,GO:0006228	ATP binding|metal ion binding|nucleoside diphosphate kinase activity|CTP biosynthetic process|GTP biosynthetic process|nucleoside diphosphate phosphorylation|UTP biosynthetic process	ko00230,ko00240,ko04016	Purine metabolism|Pyrimidine metabolism|MAPK signaling pathway - plant
CSS0000683	-0.225906	0.390887	Down	At1g19340	Methyltransferase-like protein 2	GO:0005634,GO:0008168,GO:0003676,GO:0043414,GO:0090304	nucleus|methyltransferase activity|nucleic acid binding|macromolecule methylation|nucleic acid metabolic process
CSS0000685	-0.848224	0.00262537	Down
CSS0000686	-3.19265	0.0963192	Down	SDE3	Probable RNA helicase SDE3	GO:0005829,GO:0043186,GO:0005524,GO:0016887,GO:0003723,GO:0003724,GO:0035194,GO:0009616	cytosol|P granule|ATP binding|ATP hydrolysis activity|RNA binding|RNA helicase activity|RNA-mediated post-transcriptional gene silencing|RNAi-mediated antiviral immune response
CSS0000687	0.960926	0.106258	Up	GLK1	Transcription activator GLK1	GO:0005634,GO:0003700,GO:0000976,GO:1900056,GO:0045893	nucleus|DNA-binding transcription factor activity|transcription cis-regulatory region binding|negative regulation of leaf senescence|positive regulation of DNA-templated transcription
CSS0000688	-1.03683	0.127346	Down	PSI3	Protein PSK SIMULATOR 3	GO:0005739,GO:0005634,GO:0005886,GO:0045927,GO:0006109,GO:0043434,GO:0009744	mitochondrion|nucleus|plasma membrane|positive regulation of growth|regulation of carbohydrate metabolic process|response to peptide hormone|response to sucrose
CSS0000689	-1.42825	6.92055e-06	Down
CSS0000690	-5.73262	0.143304	Down	RPL32B	60S ribosomal protein L32-2	GO:0022625,GO:0009536,GO:0003729,GO:0003735,GO:0006412	cytosolic large ribosomal subunit|plastid|mRNA binding|structural constituent of ribosome|translation
CSS0000691	0.134494	0.617238	Up
CSS0000693	1.27505	0.113012	Up		Endo-1,3;1,4-beta-D-glucanase	GO:0005576,GO:0016787	extracellular region|hydrolase activity
CSS0000695	0.531308	0.251295	Up	PLENTY	Hydroxyproline O-arabinosyltransferase PLENTY	GO:0000139,GO:0102562	Golgi membrane|hydroxyproline O-arbinofuranose transferase activity	ko00514	Other types of O-glycan biosynthesis
CSS0000696	-0.219866	0.395256	Down	TBL8	Protein trichome birefringence-like 8	GO:0005794,GO:0016020,GO:0016413	Golgi apparatus|membrane|O-acetyltransferase activity
CSS0000697	-0.135863	0.594627	Down	CPL3	RNA polymerase II C-terminal domain phosphatase-like 3	GO:0005634,GO:0046872,GO:0017018,GO:0008022,GO:0003723,GO:0008420,GO:0006952,GO:0070940,GO:0009788,GO:1900369,GO:0009651	nucleus|metal ion binding|myosin phosphatase activity|protein C-terminus binding|RNA binding|RNA polymerase II CTD heptapeptide repeat phosphatase activity|defense response|dephosphorylation of RNA polymerase II C-terminal domain|negative regulation of abscisic acid-activated signaling pathway|negative regulation of post-transcriptional gene silencing by RNA|response to salt stress
CSS0000698	-0.0883711	0.717633	Down	At2g39960	Signal peptidase complex subunit 2	GO:0005783,GO:0005787,GO:0045047,GO:0006465	endoplasmic reticulum|signal peptidase complex|protein targeting to ER|signal peptide processing	ko03060	Protein export
CSS0000699	0.0752945	0.831149	Up
CSS0000700	-0.606223	0.0697331	Down
CSS0000701	-0.76156	0.259993	Down	SCL6	Scarecrow-like protein 6	GO:0005634,GO:0003700,GO:0043565,GO:0030154,GO:0051301,GO:0007623,GO:0006355,GO:0048768	nucleus|DNA-binding transcription factor activity|sequence-specific DNA binding|cell differentiation|cell division|circadian rhythm|regulation of DNA-templated transcription|root hair cell tip growth
CSS0000702	1.09067	0.0709051	Up	PCMP-H23	Pentatricopeptide repeat-containing protein At3g03580	GO:0043231,GO:0003723,GO:0008270,GO:0009451	intracellular membrane-bounded organelle|RNA binding|zinc ion binding|RNA modification
CSS0000704	-0.030496	0.955254	Down	CIA2	Protein CHLOROPLAST IMPORT APPARATUS 2	GO:0009507,GO:0005634,GO:0045036,GO:0006355	chloroplast|nucleus|protein targeting to chloroplast|regulation of DNA-templated transcription
CSS0000705	-0.143139	0.529873	Down	At5g52840	Probable NADH dehydrogenase [ubiquinone] 1 alpha subcomplex subunit 5, mitochondrial	GO:0031966,GO:0005747,GO:0005739,GO:0009536,GO:0045271,GO:0009853,GO:0022904	mitochondrial membrane|mitochondrial respiratory chain complex I|mitochondrion|plastid|respiratory chain complex I|photorespiration|respiratory electron transport chain	ko00190	Oxidative phosphorylation
CSS0000706	-0.722484	0.0207047	Down	CPN60-2	Chaperonin CPN60-2, mitochondrial	GO:0005739,GO:0005524,GO:0140662,GO:0042026	mitochondrion|ATP binding|ATP-dependent protein folding chaperone|protein refolding	ko03018	RNA degradation
CSS0000707	0.10504	0.771717	Up	DOF3.1	Dof zinc finger protein DOF3.1	GO:0005634,GO:0003700,GO:0046872,GO:0000976,GO:0006355	nucleus|DNA-binding transcription factor activity|metal ion binding|transcription cis-regulatory region binding|regulation of DNA-templated transcription
CSS0000708	-0.295124	0.82901	Down	SBT2.4	Subtilisin-like protease SBT2.4	GO:0005576,GO:0004252,GO:0090558,GO:0006508	extracellular region|serine-type endopeptidase activity|plant epidermis development|proteolysis
CSS0000709	-0.621566	0.465557	Down	DALL4	Phospholipase A1-Igamma1, chloroplastic	GO:0009507,GO:0047714,GO:0008970,GO:0004620,GO:0004806,GO:0016042	chloroplast|galactolipase activity|phospholipase A1 activity|phospholipase activity|triglyceride lipase activity|lipid catabolic process
CSS0000710	4.98309	0.000477469	Up		Annexin-like protein RJ4	GO:0005509,GO:0005544,GO:0006950	calcium ion binding|calcium-dependent phospholipid binding|response to stress
CSS0000711	-1.68727	2.36812e-06	Down	MO2	Monooxygenase 2	GO:0005886,GO:0071949,GO:0004497,GO:0002239	plasma membrane|FAD binding|monooxygenase activity|response to oomycetes
CSS0000712	-0.059074	0.928182	Down	DIOX2	Probable 2-oxoglutarate/Fe(II)-dependent dioxygenase	GO:0051213,GO:0046872,GO:0016740	dioxygenase activity|metal ion binding|transferase activity
CSS0000714	0.0249158	0.958947	Up	SDC	Serine decarboxylase	GO:0005829,GO:0005886,GO:0030170,GO:0102705,GO:0019752,GO:0006580	cytosol|plasma membrane|pyridoxal phosphate binding|serine decarboxylase activity|carboxylic acid metabolic process|ethanolamine metabolic process	ko00564	Glycerophospholipid metabolism
CSS0000716	1.97318	0.000125587	Up	At1g61900	Uncharacterized GPI-anchored protein At1g61900	GO:0005634,GO:0005886,GO:0009506	nucleus|plasma membrane|plasmodesma
CSS0000717	-0.413338	0.0310704	Down
CSS0000718	-0.214182	0.39911	Down
CSS0000719	-0.796175	0.432331	Down
CSS0000720	1.3277	0.231939	Up	HIPP06	Heavy metal-associated isoprenylated plant protein 6	GO:0005886,GO:0046872,GO:0071456	plasma membrane|metal ion binding|cellular response to hypoxia
CSS0000721	-2.56233	0.222352	Down	RPB2	DNA-directed RNA polymerase II subunit RPB2	GO:0005665,GO:0003677,GO:0003899,GO:0046872,GO:0032549,GO:0006351	RNA polymerase II, core complex|DNA binding|DNA-directed 5'-3' RNA polymerase activity|metal ion binding|ribonucleoside binding|DNA-templated transcription	ko03020,ko03420	RNA polymerase|Nucleotide excision repair
CSS0000725	-1.60476	0.473041	Down
CSS0000726	2.13972	0.0038611	Up	ACL5	Thermospermine synthase ACAULIS5	GO:0005737,GO:0016768,GO:0010487,GO:0009926,GO:0010087,GO:0006596,GO:0048759	cytoplasm|spermine synthase activity|thermospermine synthase activity|auxin polar transport|phloem or xylem histogenesis|polyamine biosynthetic process|xylem vessel member cell differentiation
CSS0000727	-0.383256	0.125115	Down	CCT8	T-complex protein 1 subunit theta	GO:0005832,GO:0005737,GO:0005829,GO:0009506,GO:0005524,GO:0016887,GO:0140662,GO:0044183,GO:0051082,GO:0051050,GO:0006457	chaperonin-containing T-complex|cytoplasm|cytosol|plasmodesma|ATP binding|ATP hydrolysis activity|ATP-dependent protein folding chaperone|protein folding chaperone|unfolded protein binding|positive regulation of transport|protein folding
CSS0000728	-3.97843	0.312675	Down	WAXY	Granule-bound starch synthase 1, chloroplastic/amyloplastic	GO:0009501,GO:0009507,GO:0102502,GO:0004373,GO:0019252	amyloplast|chloroplast|ADP-glucose-starch glucosyltransferase activity|glycogen (starch) synthase activity|starch biosynthetic process
CSS0000729	-1.44056	0.33195	Down
CSS0000731	7.21628	6.7485e-06	Up	Os03g0162200	Probable histone H2A variant 1	GO:0000786,GO:0005634,GO:0003677,GO:0046982,GO:0030527	nucleosome|nucleus|DNA binding|protein heterodimerization activity|structural constituent of chromatin	ko03082	ATP-dependent chromatin remodeling
CSS0000732	-0.456314	0.236978	Down	EDR2L	Protein ENHANCED DISEASE RESISTANCE 2-like	GO:0005789,GO:0010008,GO:0005886,GO:0008289,GO:0006952	endoplasmic reticulum membrane|endosome membrane|plasma membrane|lipid binding|defense response
CSS0000733	0.451324	0.71748	Up	ERF1A	Ethylene-responsive transcription factor 1A	GO:0005634,GO:0003700,GO:0000976,GO:0051301,GO:0006952,GO:0009873,GO:0010087,GO:0009624	nucleus|DNA-binding transcription factor activity|transcription cis-regulatory region binding|cell division|defense response|ethylene-activated signaling pathway|phloem or xylem histogenesis|response to nematode
CSS0000734	-4.07387	0.285117	Down	OBAP2C	Oil body-associated protein 2C
CSS0000735	3.26917	0.0713379	Up
CSS0000736	-6.59231	0.080964	Down	At5g43745	Putative ion channel POLLUX-like 2	GO:0009507,GO:0009941,GO:0009536,GO:0042170,GO:0006811	chloroplast|chloroplast envelope|plastid|plastid membrane|ion transport
CSS0000737	-0.972635	0.0711858	Down	FLXL2	Protein FLX-like 2	GO:0016604,GO:0030154,GO:0009908	nuclear body|cell differentiation|flower development
CSS0000738	0.545308	0.13731	Up	LBD21	LOB domain-containing protein 21
CSS0000739	0.0955649	0.688184	Up	RPL9	60S ribosomal protein L9	GO:1990904,GO:0005840,GO:0019843,GO:0003735,GO:0006412	ribonucleoprotein complex|ribosome|rRNA binding|structural constituent of ribosome|translation	ko03010	Ribosome
CSS0000740	-0.0710844	0.797876	Down	RAP	RAP domain-containing protein, chloroplastic	GO:0009507,GO:0042644,GO:0005759,GO:0042646,GO:0035770,GO:0003723,GO:1901259,GO:0006952,GO:0000963,GO:0044528	chloroplast|chloroplast nucleoid|mitochondrial matrix|plastid nucleoid|ribonucleoprotein granule|RNA binding|chloroplast rRNA processing|defense response|mitochondrial RNA processing|regulation of mitochondrial mRNA stability
CSS0000741	-0.796638	0.322607	Down	IDN2	Protein INVOLVED IN DE NOVO 2	GO:0003723,GO:0006306,GO:0080188,GO:0010569,GO:0046686	RNA binding|DNA methylation|gene silencing by RNA-directed DNA methylation|regulation of double-strand break repair via homologous recombination|response to cadmium ion
CSS0000742	-2.16068	0.121096	Down	MIK2	MDIS1-interacting receptor like kinase 2	GO:0005886,GO:0009506,GO:0090406,GO:0005524,GO:0042277,GO:0001653,GO:0106310,GO:0004674,GO:1901653,GO:0002213,GO:0009755,GO:0009759,GO:0009695,GO:0010183,GO:0031349,GO:0006468,GO:0080027,GO:0002237	plasma membrane|plasmodesma|pollen tube|ATP binding|peptide binding|peptide receptor activity|protein serine kinase activity|protein serine/threonine kinase activity|cellular response to peptide|defense response to insect|hormone-mediated signaling pathway|indole glucosinolate biosynthetic process|jasmonic acid biosynthetic process|pollen tube guidance|positive regulation of defense response|prot…
CSS0000744	0.939482	0.235078	Up
CSS0000745	0.642718	0.160454	Up	IDD12	Protein indeterminate-domain 12	GO:0005634,GO:0003677,GO:0003700,GO:0046872,GO:0006355	nucleus|DNA binding|DNA-binding transcription factor activity|metal ion binding|regulation of DNA-templated transcription
CSS0000747	3.55269	0.367713	Up	APS1	Acid phosphatase 1	GO:0003993	acid phosphatase activity
CSS0000748	-0.243931	0.301022	Down	Os07g0201100	Coatomer subunit gamma-2	GO:0030126,GO:0005783,GO:0005793,GO:0000139,GO:0005198,GO:0006888,GO:0006891,GO:0006886,GO:0009306	COPI vesicle coat|endoplasmic reticulum|endoplasmic reticulum-Golgi intermediate compartment|Golgi membrane|structural molecule activity|endoplasmic reticulum to Golgi vesicle-mediated transport|intra-Golgi vesicle-mediated transport|intracellular protein transport|protein secretion
CSS0000749	0.892579	0.691956	Up	ALDH6B2	Methylmalonate-semialdehyde dehydrogenase [acylating], mitochondrial	GO:0005829,GO:0005739,GO:0005507,GO:0018478,GO:0004491,GO:0006210,GO:0006574	cytosol|mitochondrion|copper ion binding|malonate-semialdehyde dehydrogenase (acetylating) activity|methylmalonate-semialdehyde dehydrogenase (acylating) activity|thymine catabolic process|valine catabolic process	ko00640,ko00562,ko00280,ko00410	Propanoate metabolism|Inositol phosphate metabolism|Valine, leucine and isoleucine degradation|beta-Alanine metabolism
CSS0000750	4.03664	0.285409	Up	At4g26340	F-box/FBD/LRR-repeat protein At4g26340
CSS0000751	-0.254533	0.400832	Down
CSS0000753	0.0739936	0.919754	Up
CSS0000754	-0.132572	0.699446	Down
CSS0000755	1.94693	0.0387258	Up	FKBP65	Peptidyl-prolyl cis-trans isomerase FKBP65	GO:0005737,GO:0005634,GO:0000325,GO:0009536,GO:0005516,GO:0003755,GO:0070370,GO:0061077,GO:0000413	cytoplasm|nucleus|plant-type vacuole|plastid|calmodulin binding|peptidyl-prolyl cis-trans isomerase activity|cellular heat acclimation|chaperone-mediated protein folding|protein peptidyl-prolyl isomerization
CSS0000756	0.787076	0.0488017	Up	TFCA	Tubulin-folding cofactor A	GO:0005829,GO:0015630,GO:0005777,GO:0048487,GO:0015631,GO:0007023,GO:0006457,GO:0007021	cytosol|microtubule cytoskeleton|peroxisome|beta-tubulin binding|tubulin binding|post-chaperonin tubulin folding pathway|protein folding|tubulin complex assembly
CSS0000757	-0.22988	0.535327	Down
CSS0000760	6.11396	0.00131348	Up	At3g43630	Vacuolar iron transporter homolog 3	GO:0016020,GO:0005774,GO:0005381,GO:0005384,GO:0030026,GO:0006880,GO:0010039	membrane|vacuolar membrane|iron ion transmembrane transporter activity|manganese ion transmembrane transporter activity|cellular manganese ion homeostasis|intracellular sequestering of iron ion|response to iron ion
CSS0000761	-1.28213	0.0297698	Down	CYP716B1	Cytochrome P450 716B1	GO:0016020,GO:0020037,GO:0005506,GO:0004497,GO:0016705	membrane|heme binding|iron ion binding|monooxygenase activity|oxidoreductase activity, acting on paired donors, with incorporation or reduction of molecular oxygen
CSS0000762	-0.779946	0.398919	Down	AUG5	AUGMIN subunit 5	GO:0070652,GO:0009524,GO:0005876,GO:0051011,GO:0051301,GO:0051225	HAUS complex|phragmoplast|spindle microtubule|microtubule minus-end binding|cell division|spindle assembly
CSS0000763	-1.52522	0.0957032	Down		RNA-directed DNA polymerase homolog	GO:0005739,GO:0003968,GO:0003964	mitochondrion|RNA-dependent RNA polymerase activity|RNA-directed DNA polymerase activity
CSS0000765	-2.00655	0.208232	Down	LHT1	Lysine histidine transporter 1	GO:0016020,GO:0005886,GO:0009536,GO:0015172,GO:0015171,GO:0015293,GO:0043090,GO:0003333,GO:0006952	membrane|plasma membrane|plastid|acidic amino acid transmembrane transporter activity|amino acid transmembrane transporter activity|symporter activity|amino acid import|amino acid transmembrane transport|defense response
CSS0000766	-0.0325681	0.980434	Down
CSS0000767	-1.51652	0.519416	Down	MRS2-F	Magnesium transporter MRS2-F	GO:0016020,GO:0015095	membrane|magnesium ion transmembrane transporter activity
CSS0000768	1.58508	0.000595224	Up	REN1	Rho GTPase-activating protein REN1	GO:0045177,GO:0016324,GO:0005938,GO:0070382,GO:0090406,GO:0005096,GO:0031267,GO:0090630,GO:0035024,GO:0009846,GO:0009865,GO:0048868,GO:0009860,GO:0043547,GO:0007165	apical part of cell|apical plasma membrane|cell cortex|exocytic vesicle|pollen tube|GTPase activator activity|small GTPase binding|activation of GTPase activity|negative regulation of Rho protein signal transduction|pollen germination|pollen tube adhesion|pollen tube development|pollen tube growth|positive regulation of GTPase activity|signal transduction
CSS0000769	-0.0304207	0.921694	Down	At5g53140	Probable protein phosphatase 2C 76	GO:0005829,GO:0009536,GO:0046872,GO:0017018,GO:0006470	cytosol|plastid|metal ion binding|myosin phosphatase activity|protein dephosphorylation
CSS0000771	-0.0320637	0.961841	Down	WRKY22	WRKY transcription factor 22	GO:0005634,GO:0003700,GO:0000976,GO:0071456,GO:0006952,GO:0010150	nucleus|DNA-binding transcription factor activity|transcription cis-regulatory region binding|cellular response to hypoxia|defense response|leaf senescence	ko04016,ko04626	MAPK signaling pathway - plant|Plant-pathogen interaction
CSS0000772	1.02774	0.399049	Up
CSS0000773	0.449018	0.296943	Up
CSS0000774	4.53757	0.00195899	Up	At3g60660	Spindle and kinetochore-associated protein 1 homolog	GO:0072686,GO:0000940,GO:0005876,GO:0008017,GO:0051301,GO:0007059,GO:0000278,GO:0031110	mitotic spindle|outer kinetochore|spindle microtubule|microtubule binding|cell division|chromosome segregation|mitotic cell cycle|regulation of microtubule polymerization or depolymerization
CSS0000775	-0.270191	0.436861	Down	ATM	Serine/threonine-protein kinase ATM	GO:0005634,GO:0005524,GO:0003677,GO:0106310,GO:0004674,GO:0006281,GO:0051321,GO:0016310,GO:2001020,GO:0008380	nucleus|ATP binding|DNA binding|protein serine kinase activity|protein serine/threonine kinase activity|DNA repair|meiotic cell cycle|phosphorylation|regulation of response to DNA damage stimulus|RNA splicing
CSS0000776	-0.0184641	0.944645	Down	NUP93A	Nuclear pore complex protein NUP93A	GO:0005635,GO:0005643,GO:0005730,GO:0009506,GO:0017056,GO:0016973,GO:0006606	nuclear envelope|nuclear pore|nucleolus|plasmodesma|structural constituent of nuclear pore|poly(A)+ mRNA export from nucleus|protein import into nucleus	ko03013	Nucleocytoplasmic transport
CSS0000777	-0.159729	0.763825	Down	GAUT15	Probable galacturonosyltransferase 15	GO:0000139,GO:0047262,GO:0071555,GO:0045489	Golgi membrane|polygalacturonate 4-alpha-galacturonosyltransferase activity|cell wall organization|pectin biosynthetic process
CSS0000778	1.84372	0.149603	Up	CBSX3	CBS domain-containing protein CBSX3, mitochondrial	GO:0005829,GO:0005739,GO:0005886,GO:0050897,GO:0045454	cytosol|mitochondrion|plasma membrane|cobalt ion binding|cell redox homeostasis
CSS0000782	1.76865	0.010551	Up	NIK2	Protein NSP-INTERACTING KINASE 2	GO:0005886,GO:0005524,GO:0106310,GO:0004674,GO:0006952,GO:0006468	plasma membrane|ATP binding|protein serine kinase activity|protein serine/threonine kinase activity|defense response|protein phosphorylation
CSS0000783	0.0568133	0.901237	Up	RNP1	Heterogeneous nuclear ribonucleoprotein 1	GO:0005829,GO:0005634,GO:0005681,GO:0003729,GO:0006397,GO:0051028,GO:1901000,GO:2000070,GO:0008380,GO:0010228	cytosol|nucleus|spliceosomal complex|mRNA binding|mRNA processing|mRNA transport|regulation of response to salt stress|regulation of response to water deprivation|RNA splicing|vegetative to reproductive phase transition of meristem	ko03040	Spliceosome
CSS0000785	-0.244624	0.531708	Down	At5g43822	Uncharacterized protein At5g43822	GO:0005739,GO:0005635	mitochondrion|nuclear envelope
CSS0000786	0.387337	0.177571	Up	POP1	Ribonucleases P/MRP protein subunit POP1	GO:0005655,GO:0000172,GO:0004526,GO:0090502,GO:0006364	nucleolar ribonuclease P complex|ribonuclease MRP complex|ribonuclease P activity|RNA phosphodiester bond hydrolysis, endonucleolytic|rRNA processing	ko03008	Ribosome biogenesis in eukaryotes
CSS0000787	2.01015	0.150139	Up	LYK3	LysM domain receptor-like kinase 3	GO:0005886,GO:0005524,GO:0004674,GO:0019199,GO:0009738,GO:0006952,GO:0050832,GO:0045087,GO:0031348,GO:0009789,GO:0006468,GO:0009737	plasma membrane|ATP binding|protein serine/threonine kinase activity|transmembrane receptor protein kinase activity|abscisic acid-activated signaling pathway|defense response|defense response to fungus|innate immune response|negative regulation of defense response|positive regulation of abscisic acid-activated signaling pathway|protein phosphorylation|response to abscisic acid
CSS0000790	-2.66489	0.110789	Down	MIEL1	E3 ubiquitin-protein ligase MIEL1	GO:0005737,GO:0005634,GO:0061630,GO:0004842,GO:0008270,GO:0006952,GO:1900425,GO:1901485,GO:0016567,GO:0006511	cytoplasm|nucleus|ubiquitin protein ligase activity|ubiquitin-protein transferase activity|zinc ion binding|defense response|negative regulation of defense response to bacterium|positive regulation of transcription factor catabolic process|protein ubiquitination|ubiquitin-dependent protein catabolic process	ko04120	Ubiquitin mediated proteolysis
CSS0000791	0.508161	0.0708656	Up	RHM1	Trifunctional UDP-glucose 4,6-dehydratase/UDP-4-keto-6-deoxy-D-glucose 3,5-epimerase/UDP-4-keto-L-rhamnose-reductase RHM1	GO:0005829,GO:0005739,GO:0009506,GO:0008460,GO:0016853,GO:0016491,GO:0050377,GO:0010280,GO:0010315,GO:0030154,GO:0071555,GO:0051555,GO:0042127,GO:0010253	cytosol|mitochondrion|plasmodesma|dTDP-glucose 4,6-dehydratase activity|isomerase activity|oxidoreductase activity|UDP-glucose 4,6-dehydratase activity|UDP-L-rhamnose synthase activity|auxin export across the plasma membrane|cell differentiation|cell wall organization|flavonol biosynthetic process|regulation of cell population proliferation|UDP-rhamnose biosynthetic process	ko00520	Amino sugar and nucleotide sugar metabolism
CSS0000792	-0.485542	0.0569612	Down	NUP1	Nuclear pore complex protein NUP1	GO:0005829,GO:0005635,GO:0034399,GO:0005643,GO:0071763,GO:0006997,GO:0016973,GO:0015031	cytosol|nuclear envelope|nuclear periphery|nuclear pore|nuclear membrane organization|nucleus organization|poly(A)+ mRNA export from nucleus|protein transport
CSS0000793	-0.211506	0.289924	Down	BTR1	Protein BTR1	GO:0005737,GO:0005829,GO:0005886,GO:0003729,GO:0003727,GO:0046719,GO:0010468,GO:0008380	cytoplasm|cytosol|plasma membrane|mRNA binding|single-stranded RNA binding|regulation by virus of viral protein levels in host cell|regulation of gene expression|RNA splicing
CSS0000794	1.04341	0.424413	Up	At4g18593	Probable inactive dual specificity protein phosphatase-like At4g18593	GO:0008138,GO:0006470	protein tyrosine/serine/threonine phosphatase activity|protein dephosphorylation
CSS0000795	8.88852	3.3325e-09	Up	LRX7	Leucine-rich repeat extensin-like protein 7	GO:0005576,GO:0005199,GO:0071555	extracellular region|structural constituent of cell wall|cell wall organization
CSS0000796	-0.156726	0.564781	Down
CSS0000798	3.25358	5.95659e-05	Up	At1g27930	Probable methyltransferase At1g27930	GO:0005768,GO:0005794,GO:0005797,GO:0000139,GO:0005634,GO:0005802,GO:0030775,GO:0009827,GO:0009834,GO:0006479,GO:0045492	endosome|Golgi apparatus|Golgi medial cisterna|Golgi membrane|nucleus|trans-Golgi network|glucuronoxylan 4-O-methyltransferase activity|plant-type cell wall modification|plant-type secondary cell wall biogenesis|protein methylation|xylan biosynthetic process
CSS0000799	-0.00131958	0.997129	Down	OBGL	GTP-binding protein OBGC, chloroplastic	GO:0009507,GO:0009706,GO:0009570,GO:0005739,GO:0005525,GO:0003924,GO:0000287,GO:0003729,GO:0009658,GO:0009793,GO:0009416,GO:0006364,GO:0010027	chloroplast|chloroplast inner membrane|chloroplast stroma|mitochondrion|GTP binding|GTPase activity|magnesium ion binding|mRNA binding|chloroplast organization|embryo development ending in seed dormancy|response to light stimulus|rRNA processing|thylakoid membrane organization
CSS0000800	7.49605	1.6488e-06	Up	SAUR20	Auxin-responsive protein SAUR20	GO:0005886,GO:0009734,GO:0009733	plasma membrane|auxin-activated signaling pathway|response to auxin	ko04075	Plant hormone signal transduction
CSS0000801	-0.16174	0.605852	Down	ARPC4	Actin-related protein 2/3 complex subunit 4	GO:0005885,GO:0042995,GO:0005737,GO:0051015,GO:0030041,GO:0034314	Arp2/3 protein complex|cell projection|cytoplasm|actin filament binding|actin filament polymerization|Arp2/3 complex-mediated actin nucleation	ko04144	Endocytosis
CSS0000802	-0.278633	0.603983	Down	PCMP-H52	Putative pentatricopeptide repeat-containing protein At5g52630	GO:0003723,GO:0008270,GO:0016554	RNA binding|zinc ion binding|cytidine to uridine editing
CSS0000803	-1.78692	0.0452921	Down	XTH1	Xyloglucan endotransglucosylase protein 1	GO:0048046,GO:0004553,GO:0016762,GO:0042546,GO:0071555,GO:0009835,GO:0010411	apoplast|hydrolase activity, hydrolyzing O-glycosyl compounds|xyloglucan:xyloglucosyl transferase activity|cell wall biogenesis|cell wall organization|fruit ripening|xyloglucan metabolic process	ko04075	Plant hormone signal transduction
CSS0000804	1.21364	0.0568859	Up	GAUT1	Polygalacturonate 4-alpha-galacturonosyltransferase	GO:0005768,GO:0005794,GO:0005797,GO:0000139,GO:0005802,GO:0047262,GO:0010289	endosome|Golgi apparatus|Golgi medial cisterna|Golgi membrane|trans-Golgi network|polygalacturonate 4-alpha-galacturonosyltransferase activity|homogalacturonan biosynthetic process	ko00520	Amino sugar and nucleotide sugar metabolism
CSS0000806	0.341682	0.720723	Up	UGT90A1	UDP-glycosyltransferase 90A1	GO:0008194	UDP-glycosyltransferase activity
CSS0000809	-0.330241	0.45265	Down
CSS0000810	0.337836	0.713628	Up	LPAT2	1-acyl-sn-glycerol-3-phosphate acyltransferase 2	GO:0012505,GO:0005783,GO:0005789,GO:0003841,GO:0016746,GO:0016024	endomembrane system|endoplasmic reticulum|endoplasmic reticulum membrane|1-acylglycerol-3-phosphate O-acyltransferase activity|acyltransferase activity|CDP-diacylglycerol biosynthetic process	ko00561,ko00564	Glycerolipid metabolism|Glycerophospholipid metabolism
CSS0000812	0.040629	0.975355	Up	PCMP-E15	Pentatricopeptide repeat-containing protein At2g35030, mitochondrial	GO:0043231,GO:0005739,GO:0003723,GO:0009451	intracellular membrane-bounded organelle|mitochondrion|RNA binding|RNA modification
CSS0000813	-0.0238148	0.935357	Down	RPL7D	60S ribosomal protein L7-4	GO:0005829,GO:0022625,GO:0022626,GO:0042788,GO:0003729,GO:0003723,GO:0003735,GO:0000463	cytosol|cytosolic large ribosomal subunit|cytosolic ribosome|polysomal ribosome|mRNA binding|RNA binding|structural constituent of ribosome|maturation of LSU-rRNA from tricistronic rRNA transcript (SSU-rRNA, 5.8S rRNA, LSU-rRNA)	ko03010	Ribosome
CSS0000814	-0.412156	0.122463	Down	PPI1	Proton pump-interactor 1	GO:0005829,GO:0005783,GO:0005789,GO:0005886,GO:0009506,GO:0003729,GO:0010155	cytosol|endoplasmic reticulum|endoplasmic reticulum membrane|plasma membrane|plasmodesma|mRNA binding|regulation of proton transport
CSS0000819	-0.11639	0.619195	Down		Guanine nucleotide-binding protein subunit beta-1	GO:0005737,GO:0005834,GO:0030159,GO:0007186	cytoplasm|heterotrimeric G-protein complex|signaling receptor complex adaptor activity|G protein-coupled receptor signaling pathway
CSS0000820	-1.07629	0.0222301	Down	NBP35	Cytosolic Fe-S cluster assembly factor NBP35	GO:0005829,GO:0051539,GO:0005524,GO:0140663,GO:0051536,GO:0046872,GO:0042803,GO:0016226	cytosol|4 iron, 4 sulfur cluster binding|ATP binding|ATP-dependent FeS chaperone activity|iron-sulfur cluster binding|metal ion binding|protein homodimerization activity|iron-sulfur cluster assembly
CSS0000821	-0.0685969	0.941818	Down
CSS0000823	-1.49732	0.50264	Down	CYC1-2	Cytochrome c1 2, heme protein, mitochondrial	GO:0005750,GO:0005739,GO:0009536,GO:0005773,GO:0009055,GO:0020037,GO:0046872,GO:0006122	mitochondrial respiratory chain complex III|mitochondrion|plastid|vacuole|electron transfer activity|heme binding|metal ion binding|mitochondrial electron transport, ubiquinol to cytochrome c	ko00190	Oxidative phosphorylation
CSS0000824	7.61258	1.04499e-07	Up	CYP734A1	Cytochrome P450 734A1	GO:0016020,GO:0020037,GO:0005506,GO:0004497,GO:0016705,GO:0008395,GO:0010268,GO:0016131,GO:0009741	membrane|heme binding|iron ion binding|monooxygenase activity|oxidoreductase activity, acting on paired donors, with incorporation or reduction of molecular oxygen|steroid hydroxylase activity|brassinosteroid homeostasis|brassinosteroid metabolic process|response to brassinosteroid	ko00905	Brassinosteroid biosynthesis
CSS0000825	0.23733	0.461927	Up	SOC1	MADS-box protein SOC1	GO:0005737,GO:0005634,GO:0003700,GO:0000981,GO:0046983,GO:0000978,GO:0030154,GO:0009908,GO:0010077,GO:0045893,GO:0009911,GO:0045944,GO:0006357,GO:0009409,GO:0009739	cytoplasm|nucleus|DNA-binding transcription factor activity|DNA-binding transcription factor activity, RNA polymerase II-specific|protein dimerization activity|RNA polymerase II cis-regulatory region sequence-specific DNA binding|cell differentiation|flower development|maintenance of inflorescence meristem identity|positive regulation of DNA-templated transcription|positive regulation of flower d…
CSS0000826	0.33422	0.761278	Up	PMI1	Mannose-6-phosphate isomerase 1	GO:0005829,GO:0004476,GO:0008270,GO:0005975,GO:0009793,GO:0009298,GO:0046686,GO:0032025,GO:0033591,GO:0009416,GO:0010043	cytosol|mannose-6-phosphate isomerase activity|zinc ion binding|carbohydrate metabolic process|embryo development ending in seed dormancy|GDP-mannose biosynthetic process|response to cadmium ion|response to cobalt ion|response to L-ascorbic acid|response to light stimulus|response to zinc ion	ko00051,ko00520	Fructose and mannose metabolism|Amino sugar and nucleotide sugar metabolism
CSS0000827	-0.437189	0.226356	Down	SEC24C	Protein transport protein SEC24 C	GO:0030127,GO:0070971,GO:0005789,GO:0000139,GO:0000149,GO:0008270,GO:0090110,GO:0006886	COPII vesicle coat|endoplasmic reticulum exit site|endoplasmic reticulum membrane|Golgi membrane|SNARE binding|zinc ion binding|COPII-coated vesicle cargo loading|intracellular protein transport	ko04141	Protein processing in endoplasmic reticulum
CSS0000828	0.676315	0.0588142	Up	CYP40	Peptidyl-prolyl cis-trans isomerase CYP40	GO:0005737,GO:0016018,GO:0003755,GO:0010582,GO:0006457,GO:0000413,GO:0010050	cytoplasm|cyclosporin A binding|peptidyl-prolyl cis-trans isomerase activity|floral meristem determinacy|protein folding|protein peptidyl-prolyl isomerization|vegetative phase change
CSS0000829	-0.154237	0.898449	Down
CSS0000831	1.38188	0.00126343	Up	BHLH089	Transcription factor BHLH089	GO:0005634,GO:0003677,GO:0003700,GO:0046983,GO:0006355	nucleus|DNA binding|DNA-binding transcription factor activity|protein dimerization activity|regulation of DNA-templated transcription
CSS0000832	0.263207	0.329982	Up	UTR7	UDP-galactose/UDP-glucose transporter 7	GO:0005794,GO:0000139,GO:0015297,GO:0005459,GO:0005460,GO:0008643,GO:0048527,GO:0080147,GO:0072334,GO:0015786	Golgi apparatus|Golgi membrane|antiporter activity|UDP-galactose transmembrane transporter activity|UDP-glucose transmembrane transporter activity|carbohydrate transport|lateral root development|root hair cell development|UDP-galactose transmembrane transport|UDP-glucose transmembrane transport
CSS0000834	-0.291933	0.555425	Down	SBT1.4	Subtilisin-like protease SBT1.4	GO:0048046,GO:0005829,GO:0000325,GO:0099503,GO:0004252,GO:0010150,GO:0006508,GO:0010223	apoplast|cytosol|plant-type vacuole|secretory vesicle|serine-type endopeptidase activity|leaf senescence|proteolysis|secondary shoot formation
CSS0000835	0.246261	0.373308	Up	PPTase	Phosphopantetheinyl transferase	GO:0005829,GO:0008897,GO:0000287,GO:0006633	cytosol|holo-[acyl-carrier-protein] synthase activity|magnesium ion binding|fatty acid biosynthetic process	ko00770	Pantothenate and CoA biosynthesis
CSS0000837	-0.394614	0.043309	Down	At4g06599	Ubiquitin-like domain-containing CTD phosphatase	GO:0005634,GO:0017018	nucleus|myosin phosphatase activity
CSS0000839	0.0260805	0.931245	Up	At4g17560	50S ribosomal protein L19-1, chloroplastic	GO:0009507,GO:0009941,GO:0009570,GO:0005829,GO:1990904,GO:0005840,GO:0003729,GO:0019843,GO:0003735,GO:0006412	chloroplast|chloroplast envelope|chloroplast stroma|cytosol|ribonucleoprotein complex|ribosome|mRNA binding|rRNA binding|structural constituent of ribosome|translation	ko03010	Ribosome
CSS0000842	-0.811725	0.0364079	Down	UBA1	Ubiquitin-activating enzyme E1 1	GO:0005737,GO:0005829,GO:0005634,GO:0005777,GO:0009506,GO:0005524,GO:0004839,GO:0004842,GO:0006974,GO:0032446,GO:0016567,GO:0051707,GO:0006511	cytoplasm|cytosol|nucleus|peroxisome|plasmodesma|ATP binding|ubiquitin activating enzyme activity|ubiquitin-protein transferase activity|cellular response to DNA damage stimulus|protein modification by small protein conjugation|protein ubiquitination|response to other organism|ubiquitin-dependent protein catabolic process	ko04120	Ubiquitin mediated proteolysis
CSS0000845	-0.594752	0.231404	Down		Cytochrome P450 CYP72A219	GO:0016020,GO:0020037,GO:0005506,GO:0004497,GO:0016705	membrane|heme binding|iron ion binding|monooxygenase activity|oxidoreductase activity, acting on paired donors, with incorporation or reduction of molecular oxygen
CSS0000847	-0.316798	0.474224	Down	SDP1	Triacylglycerol lipase SDP1	GO:0016020,GO:0012511,GO:0005777,GO:0004806,GO:0006071,GO:0019433,GO:0006641	membrane|monolayer-surrounded lipid storage body|peroxisome|triglyceride lipase activity|glycerol metabolic process|triglyceride catabolic process|triglyceride metabolic process	ko00100,ko00561,ko00564,ko00565,ko00590,ko00591,ko00592	Steroid biosynthesis|Glycerolipid metabolism|Glycerophospholipid metabolism|Ether lipid metabolism|Arachidonic acid metabolism|Linoleic acid metabolism|alpha-Linolenic acid metabolism
CSS0000848	0.544432	0.610677	Up	RH36	DEAD-box ATP-dependent RNA helicase 36	GO:0005634,GO:0090406,GO:0005524,GO:0016887,GO:0003676,GO:0003724,GO:0009553,GO:0009561,GO:0009791,GO:0006364	nucleus|pollen tube|ATP binding|ATP hydrolysis activity|nucleic acid binding|RNA helicase activity|embryo sac development|megagametogenesis|post-embryonic development|rRNA processing
CSS0000849	2.5757	0.396197	Up
CSS0000850	-5.83569	0.136178	Down	CSLG2	Cellulose synthase-like protein G2	GO:0000139,GO:0005886,GO:0016760,GO:0051753,GO:0071555,GO:0030244,GO:0009833	Golgi membrane|plasma membrane|cellulose synthase (UDP-forming) activity|mannan synthase activity|cell wall organization|cellulose biosynthetic process|plant-type primary cell wall biogenesis
CSS0000852	0.167878	0.912544	Up	At1g31730	AP-4 complex subunit epsilon	GO:0030124,GO:0005905,GO:0005794,GO:0009506,GO:0140312,GO:0006886	AP-4 adaptor complex|clathrin-coated pit|Golgi apparatus|plasmodesma|cargo adaptor activity|intracellular protein transport
CSS0000854	-4.50511	0.081961	Down	RPV1	Disease resistance protein RPV1	GO:0005737,GO:0005634,GO:0043531,GO:0050135,GO:0061809,GO:0042803,GO:0050832,GO:0043068,GO:0007165	cytoplasm|nucleus|ADP binding|NAD(P)+ nucleosidase activity|NAD+ nucleotidase, cyclic ADP-ribose generating|protein homodimerization activity|defense response to fungus|positive regulation of programmed cell death|signal transduction
CSS0000855	0.278197	0.580917	Up	ECA3	Calcium-transporting ATPase 3, endoplasmic reticulum-type	GO:0012505,GO:0005768,GO:0010008,GO:0005794,GO:0000139,GO:0016020,GO:0005802,GO:0015410,GO:0005524,GO:0016887,GO:0046872,GO:0005388,GO:0015662,GO:0070588,GO:0006816,GO:0006874,GO:0034220,GO:0055071,GO:0048364	endomembrane system|endosome|endosome membrane|Golgi apparatus|Golgi membrane|membrane|trans-Golgi network|ABC-type manganese transporter activity|ATP binding|ATP hydrolysis activity|metal ion binding|P-type calcium transporter activity|P-type ion transporter activity|calcium ion transmembrane transport|calcium ion transport|cellular calcium ion homeostasis|ion transmembrane transport|manganese i…	ko04148	Efferocytosis
CSS0000856	-0.85812	0.0152691	Down	GAPCP1	Glyceraldehyde-3-phosphate dehydrogenase GAPCP1, chloroplastic	GO:0009570,GO:0005829,GO:0009536,GO:0005507,GO:0004365,GO:0051287,GO:0050661,GO:0008270,GO:0048658,GO:0005975,GO:0080144,GO:0006006,GO:0006096,GO:0009555,GO:0080022	chloroplast stroma|cytosol|plastid|copper ion binding|glyceraldehyde-3-phosphate dehydrogenase (NAD+) (phosphorylating) activity|NAD binding|NADP binding|zinc ion binding|anther wall tapetum development|carbohydrate metabolic process|cellular amino acid homeostasis|glucose metabolic process|glycolytic process|pollen development|primary root development	ko00010,ko00710	Glycolysis / Gluconeogenesis|Carbon fixation in photosynthetic organisms
CSS0000857	0.394624	0.587448	Up
CSS0000860	-0.443477	0.389279	Down
CSS0000861	-0.591744	0.0140269	Down	SIP1-1	Aquaporin SIP1-1	GO:0016020,GO:0015250	membrane|water channel activity
CSS0000863	-1.61761	0.0229529	Down
CSS0000864	0.0962354	0.777067	Up	BOI	E3 ubiquitin-protein ligase BOI	GO:0005634,GO:0046872,GO:0004842,GO:0042742,GO:0050832,GO:2000117,GO:0043069,GO:0043161,GO:0043067,GO:0009739	nucleus|metal ion binding|ubiquitin-protein transferase activity|defense response to bacterium|defense response to fungus|negative regulation of cysteine-type endopeptidase activity|negative regulation of programmed cell death|proteasome-mediated ubiquitin-dependent protein catabolic process|regulation of programmed cell death|response to gibberellin
CSS0000867	-0.294487	0.810095	Down	At4g04980	Uncharacterized protein At4g04980	GO:0009707,GO:0009658	chloroplast outer membrane|chloroplast organization
CSS0000868	3.10317	3.87252e-06	Up	GRF1	Growth-regulating factor 1	GO:0005634,GO:0005524,GO:0000976,GO:0006351,GO:0019760,GO:0006355,GO:0061062,GO:0009409,GO:0009739,GO:0009624,GO:0048364	nucleus|ATP binding|transcription cis-regulatory region binding|DNA-templated transcription|glucosinolate metabolic process|regulation of DNA-templated transcription|regulation of nematode larval development|response to cold|response to gibberellin|response to nematode|root development
CSS0000869	0.723244	0.435933	Up	At3g62310	Probable pre-mRNA-splicing factor ATP-dependent RNA helicase DEAH2	GO:0005730,GO:0005681,GO:0005524,GO:0016887,GO:0003729,GO:0003723,GO:0003724,GO:0006397,GO:0008380	nucleolus|spliceosomal complex|ATP binding|ATP hydrolysis activity|mRNA binding|RNA binding|RNA helicase activity|mRNA processing|RNA splicing	ko03040	Spliceosome
CSS0000870	0.0740859	0.96589	Up
CSS0000871	-3.3137	0.0012973	Down	F	Dihydroflavonol 4-reductase	GO:0045552,GO:0047890,GO:0009718	dihydrokaempferol 4-reductase activity|flavanone 4-reductase activity|anthocyanin-containing compound biosynthetic process
CSS0000872	-0.89938	0.119954	Down	JMJ27	Lysine-specific demethylase JMJ27	GO:0000785,GO:0005737,GO:0000118,GO:0005634,GO:0031490,GO:0032454,GO:0140683,GO:0046872,GO:0003712,GO:0042742,GO:0040029,GO:0033169,GO:1902584,GO:2000028,GO:0090333,GO:0006357,GO:0009617,GO:0009414	chromatin|cytoplasm|histone deacetylase complex|nucleus|chromatin DNA binding|histone H3K9 demethylase activity|histone H3K9me/H3K9me2 demethylase activity|metal ion binding|transcription coregulator activity|defense response to bacterium|epigenetic regulation of gene expression|histone H3-K9 demethylation|positive regulation of response to water deprivation|regulation of photoperiodism, flowerin…
CSS0000874	-0.160508	0.762774	Down	NFYC4	Nuclear transcription factor Y subunit C-4	GO:0005737,GO:0005634,GO:0003677,GO:0001228,GO:0046982,GO:0009908,GO:0048579,GO:0006355	cytoplasm|nucleus|DNA binding|DNA-binding transcription activator activity, RNA polymerase II-specific|protein heterodimerization activity|flower development|negative regulation of long-day photoperiodism, flowering|regulation of DNA-templated transcription
CSS0000876	0.303415	0.404585	Up	IDM1	Increased DNA methylation 1	GO:0005634,GO:0009506,GO:0010385,GO:0004402,GO:0042393,GO:0046872,GO:0080188,GO:0044154,GO:0043971,GO:0043972,GO:0044030	nucleus|plasmodesma|double-stranded methylated DNA binding|histone acetyltransferase activity|histone binding|metal ion binding|gene silencing by RNA-directed DNA methylation|histone H3-K14 acetylation|histone H3-K18 acetylation|histone H3-K23 acetylation|regulation of DNA methylation
CSS0000878	4.07636	0.291156	Up
CSS0000879	0.428797	0.12868	Up	RPL5	60S ribosomal protein L5	GO:0005737,GO:0005634,GO:1990904,GO:0005840,GO:0008097,GO:0003735,GO:0006412	cytoplasm|nucleus|ribonucleoprotein complex|ribosome|5S rRNA binding|structural constituent of ribosome|translation	ko03010	Ribosome
CSS0000880	5.31101	2.54781e-22	Up
CSS0000881	1.44343	0.109188	Up
CSS0000882	1.03416	0.335012	Up	ERF113	Ethylene-responsive transcription factor ERF113	GO:0005634,GO:0003700,GO:0000976,GO:0071497,GO:0009873,GO:0019760,GO:0045893,GO:0009737,GO:0009723,GO:0009753,GO:0009751,GO:0009651,GO:0009414	nucleus|DNA-binding transcription factor activity|transcription cis-regulatory region binding|cellular response to freezing|ethylene-activated signaling pathway|glucosinolate metabolic process|positive regulation of DNA-templated transcription|response to abscisic acid|response to ethylene|response to jasmonic acid|response to salicylic acid|response to salt stress|response to water deprivation
CSS0000883	1.6649	0.104166	Up	ACA9	Calcium-transporting ATPase 9, plasma membrane-type	GO:0043231,GO:0016020,GO:0005886,GO:0005524,GO:0016887,GO:0019829,GO:0005516,GO:0046872,GO:0005388,GO:0009567,GO:0009555	intracellular membrane-bounded organelle|membrane|plasma membrane|ATP binding|ATP hydrolysis activity|ATPase-coupled cation transmembrane transporter activity|calmodulin binding|metal ion binding|P-type calcium transporter activity|double fertilization forming a zygote and endosperm|pollen development
CSS0000884	-0.299959	0.494803	Down
CSS0000885	2.65399	0.188533	Up		Lignin-forming anionic peroxidase	GO:0005576,GO:0020037,GO:0140825,GO:0046872,GO:0042744,GO:0006979	extracellular region|heme binding|lactoperoxidase activity|metal ion binding|hydrogen peroxide catabolic process|response to oxidative stress	ko00940	Phenylpropanoid biosynthesis
CSS0000886	-0.372981	0.132827	Down
CSS0000887	-0.115484	0.853962	Down		Pyruvate kinase isozyme A, chloroplastic	GO:0009507,GO:0005524,GO:0016301,GO:0000287,GO:0030955,GO:0004743	chloroplast|ATP binding|kinase activity|magnesium ion binding|potassium ion binding|pyruvate kinase activity	ko00010,ko00620	Glycolysis / Gluconeogenesis|Pyruvate metabolism
CSS0000888	-0.340669	0.535326	Down	PCMP-H73	Pentatricopeptide repeat-containing protein At1g15510, chloroplastic	GO:0009507,GO:0043231,GO:0003723,GO:0008270,GO:0009658,GO:0009416,GO:0009451	chloroplast|intracellular membrane-bounded organelle|RNA binding|zinc ion binding|chloroplast organization|response to light stimulus|RNA modification
CSS0000889	0.917721	0.0232115	Up	At5g52970	Thylakoid lumenal 15.0 kDa protein 2, chloroplastic	GO:0009507,GO:0009543,GO:0009579,GO:0031977	chloroplast|chloroplast thylakoid lumen|thylakoid|thylakoid lumen
CSS0000890	0.928649	0.298213	Up
CSS0000893	0.474317	0.05363	Up	CAX2	Vacuolar cation/proton exchanger 2	GO:0009705,GO:0015369,GO:0070588,GO:0006874	plant-type vacuole membrane|calcium:proton antiporter activity|calcium ion transmembrane transport|cellular calcium ion homeostasis
CSS0000895	-0.748791	0.0489769	Down
CSS0000896	-0.342855	0.176148	Down	SWC6	SWR1 complex subunit 6	GO:0016607,GO:0005634,GO:0000812,GO:0140849,GO:0042802,GO:0046872,GO:0031491,GO:0030154,GO:0042742,GO:0009908,GO:0048638,GO:0009909	nuclear speck|nucleus|Swr1 complex|ATP-dependent H2AZ histone chaperone activity|identical protein binding|metal ion binding|nucleosome binding|cell differentiation|defense response to bacterium|flower development|regulation of developmental growth|regulation of flower development	ko03082	ATP-dependent chromatin remodeling
CSS0000898	1.41327	0.17413	Up		Ferredoxin-thioredoxin reductase catalytic chain, chloroplastic	GO:0009507,GO:0051539,GO:0009055,GO:0103012,GO:0046872,GO:0016730	chloroplast|4 iron, 4 sulfur cluster binding|electron transfer activity|ferredoxin-thioredoxin reductase activity|metal ion binding|oxidoreductase activity, acting on iron-sulfur proteins as donors
CSS0000901	-1.58239	1.86184e-07	Down	HIPP21	Heavy metal-associated isoprenylated plant protein 21	GO:0016020,GO:0046872,GO:0055073,GO:0071585	membrane|metal ion binding|cadmium ion homeostasis|detoxification of cadmium ion
CSS0000902	-0.918358	0.0006425	Down	PAB2	Polyadenylate-binding protein 2	GO:0005829,GO:0005634,GO:0005886,GO:1990904,GO:0003730,GO:0003729,GO:0008143,GO:0008266,GO:0003723,GO:0003743,GO:0000184,GO:1900151,GO:0060211,GO:0006446,GO:0006413	cytosol|nucleus|plasma membrane|ribonucleoprotein complex|mRNA 3'-UTR binding|mRNA binding|poly(A) binding|poly(U) RNA binding|RNA binding|translation initiation factor activity|nuclear-transcribed mRNA catabolic process, nonsense-mediated decay|regulation of nuclear-transcribed mRNA catabolic process, deadenylation-dependent decay|regulation of nuclear-transcribed mRNA poly(A) tail shortening|re…	ko03015,ko03018	mRNA surveillance pathway|RNA degradation
CSS0000903	-0.0458392	0.953437	Down					ko00230,ko00240,ko00760	Purine metabolism|Pyrimidine metabolism|Nicotinate and nicotinamide metabolism
CSS0000908	-0.0250306	0.974462	Down
CSS0000909	-0.726948	0.337385	Down	RTEL1	Regulator of telomere elongation helicase 1 homolog	GO:0005634,GO:0051539,GO:0005524,GO:0016887,GO:0003677,GO:0003678,GO:0070182,GO:0046872,GO:0032508,GO:0036297,GO:0043007,GO:0070716,GO:0045910,GO:1904430,GO:0009555,GO:0000725,GO:0010569,GO:0048364,GO:0090657	nucleus|4 iron, 4 sulfur cluster binding|ATP binding|ATP hydrolysis activity|DNA binding|DNA helicase activity|DNA polymerase binding|metal ion binding|DNA duplex unwinding|interstrand cross-link repair|maintenance of rDNA|mismatch repair involved in maintenance of fidelity involved in DNA-dependent DNA replication|negative regulation of DNA recombination|negative regulation of t-circle formation…
CSS0000910	0.175174	0.461952	Up
CSS0000911	0.546717	0.27751	Up	NUDT8	Nudix hydrolase 8	GO:0005829,GO:0047631,GO:0046872,GO:0051287,GO:0035529,GO:0009611	cytosol|ADP-ribose diphosphatase activity|metal ion binding|NAD binding|NADH pyrophosphatase activity|response to wounding
CSS0000912	0.497361	0.60421	Up
CSS0000913	0.273617	0.239602	Up
CSS0000914	-0.81024	0.00391534	Down
CSS0000915	0.352079	0.834547	Up
CSS0000916	-0.246982	0.289059	Down	pKIWI502	Fruit protein pKIWI502	GO:0016491	oxidoreductase activity
CSS0000918	1.32434	0.00743829	Up	ETR2	Ethylene receptor 2	GO:0005783,GO:0005789,GO:0005524,GO:0051740,GO:0038199,GO:0046872,GO:0000155,GO:0004674,GO:0071456,GO:0010105	endoplasmic reticulum|endoplasmic reticulum membrane|ATP binding|ethylene binding|ethylene receptor activity|metal ion binding|phosphorelay sensor kinase activity|protein serine/threonine kinase activity|cellular response to hypoxia|negative regulation of ethylene-activated signaling pathway	ko04016,ko04075	MAPK signaling pathway - plant|Plant hormone signal transduction
CSS0000919	-0.426276	0.440951	Down	RITF1	Protein RGF1 INDUCIBLE TRANSCRIPTION FACTOR 1	GO:0005634,GO:0046872,GO:0010078,GO:2000377,GO:2000280,GO:0043434	nucleus|metal ion binding|maintenance of root meristem identity|regulation of reactive oxygen species metabolic process|regulation of root development|response to peptide hormone
CSS0000920	0.0997212	0.868599	Up	OPT3	Oligopeptide transporter 3	GO:0005829,GO:0016020,GO:0005886,GO:0009506,GO:0035673,GO:0046915,GO:0006875,GO:0055072,GO:0015031,GO:1990388	cytosol|membrane|plasma membrane|plasmodesma|oligopeptide transmembrane transporter activity|transition metal ion transmembrane transporter activity|cellular metal ion homeostasis|iron ion homeostasis|protein transport|xylem-to-phloem iron transport
CSS0000921	-4.1996	0.285951	Down	PHY1	Light-sensor Protein kinase	GO:0005886,GO:0005524,GO:0009882,GO:0106310,GO:0004674,GO:0009584,GO:0006468,GO:0006355	plasma membrane|ATP binding|blue light photoreceptor activity|protein serine kinase activity|protein serine/threonine kinase activity|detection of visible light|protein phosphorylation|regulation of DNA-templated transcription
CSS0000922	1.7477	0.000661548	Up	CRK1	CDPK-related kinase 1	GO:0005737,GO:0016020,GO:0005634,GO:0005524,GO:0009931,GO:0005516,GO:0004683,GO:0046872,GO:0106310,GO:0010286,GO:0035556,GO:0018105,GO:0046777	cytoplasm|membrane|nucleus|ATP binding|calcium-dependent protein serine/threonine kinase activity|calmodulin binding|calmodulin-dependent protein kinase activity|metal ion binding|protein serine kinase activity|heat acclimation|intracellular signal transduction|peptidyl-serine phosphorylation|protein autophosphorylation
CSS0000923	-0.790412	0.0171488	Down
CSS0000924	-0.0853303	0.774898	Down	AGL80	Agamous-like MADS-box protein AGL80	GO:0005634,GO:0043078,GO:0003700,GO:0000981,GO:0046983,GO:0000978,GO:0000976,GO:0045944,GO:0006357	nucleus|polar nucleus|DNA-binding transcription factor activity|DNA-binding transcription factor activity, RNA polymerase II-specific|protein dimerization activity|RNA polymerase II cis-regulatory region sequence-specific DNA binding|transcription cis-regulatory region binding|positive regulation of transcription by RNA polymerase II|regulation of transcription by RNA polymerase II
CSS0000925	-0.117515	0.874637	Down
CSS0000928	-0.135728	0.950994	Down	SKD1	Protein SUPPRESSOR OF K(+) TRANSPORT GROWTH DEFECT 1	GO:0005737,GO:0005771,GO:0032585,GO:0005634,GO:0005777,GO:0009506,GO:0005524,GO:0016887,GO:0007049,GO:0016197,GO:0007032,GO:0055075,GO:0015031,GO:0055078,GO:0010091,GO:0007033,GO:0016192	cytoplasm|multivesicular body|multivesicular body membrane|nucleus|peroxisome|plasmodesma|ATP binding|ATP hydrolysis activity|cell cycle|endosomal transport|endosome organization|potassium ion homeostasis|protein transport|sodium ion homeostasis|trichome branching|vacuole organization|vesicle-mediated transport	ko03250,ko04144	Viral life cycle - HIV-1|Endocytosis
CSS0000929	-2.54437	0.215013	Down
CSS0000934	1.62457	0.0267478	Up
CSS0000935	-0.0273003	0.937912	Down
CSS0000937	-1.41427	0.62088	Down	FKBP17-1	Peptidyl-prolyl cis-trans isomerase FKBP17-1, chloroplastic	GO:0009543,GO:0003755	chloroplast thylakoid lumen|peptidyl-prolyl cis-trans isomerase activity
CSS0000938	0.0878566	0.759876	Up	TGAL1	Transcription factor TGAL1	GO:0005634,GO:0003700,GO:0043565,GO:0006952	nucleus|DNA-binding transcription factor activity|sequence-specific DNA binding|defense response	ko04075	Plant hormone signal transduction
CSS0000939	4.58113	0.00681053	Up	CYCU4-1	Cyclin-U4-1	GO:0019901,GO:0007049,GO:0051301,GO:0000079	protein kinase binding|cell cycle|cell division|regulation of cyclin-dependent protein serine/threonine kinase activity
CSS0000941	1.90123	0.00203488	Up	JGB	Protein JINGUBANG	GO:0005737,GO:0005634,GO:0009846	cytoplasm|nucleus|pollen germination
CSS0000942	0.362968	0.47518	Up	PAP12	Probable plastid-lipid-associated protein 12, chloroplastic	GO:0009507,GO:0009941,GO:0009534,GO:0009535,GO:0005634	chloroplast|chloroplast envelope|chloroplast thylakoid|chloroplast thylakoid membrane|nucleus
CSS0000944	-0.528898	0.16288	Down	DEGP7	Protease Do-like 7	GO:0009507,GO:0008233,GO:0004252,GO:0010205,GO:0006508	chloroplast|peptidase activity|serine-type endopeptidase activity|photoinhibition|proteolysis
CSS0000946	-0.726201	0.192457	Down	At3g08860	Alanine--glyoxylate aminotransferase 2 homolog 3, mitochondrial	GO:0005739,GO:0008453,GO:0030170,GO:0043562,GO:0009853	mitochondrion|alanine-glyoxylate transaminase activity|pyridoxal phosphate binding|cellular response to nitrogen levels|photorespiration	ko00250,ko00260,ko00270,ko00280	Alanine, aspartate and glutamate metabolism|Glycine, serine and threonine metabolism|Cysteine and methionine metabolism|Valine, leucine and isoleucine degradation
CSS0000947	0.391243	0.688457	Up
CSS0000952	1.89919	3.28596e-06	Up	PSI1	Protein PSK SIMULATOR 1	GO:0005634,GO:0045927,GO:0006109,GO:0043434	nucleus|positive regulation of growth|regulation of carbohydrate metabolic process|response to peptide hormone
CSS0000954	0.0513931	0.904283	Up	BT1	Adenine nucleotide transporter BT1, chloroplastic/mitochondrial	GO:0009507,GO:0009941,GO:0009706,GO:0005743,GO:0005739,GO:0005886,GO:0009536,GO:0055085	chloroplast|chloroplast envelope|chloroplast inner membrane|mitochondrial inner membrane|mitochondrion|plasma membrane|plastid|transmembrane transport
CSS0000956	-0.424745	0.242041	Down	NOV	Protein NO VEIN	GO:0005634,GO:0009926,GO:0001708,GO:0009793,GO:0010305,GO:0048364,GO:0019827	nucleus|auxin polar transport|cell fate specification|embryo development ending in seed dormancy|leaf vascular tissue pattern formation|root development|stem cell population maintenance
CSS0000957	0.428441	0.563507	Up	FEY	Dehydrogenase/reductase SDR family member FEY	GO:0005783,GO:0016491,GO:0010073,GO:2000024	endoplasmic reticulum|oxidoreductase activity|meristem maintenance|regulation of leaf development
CSS0000958	-0.055629	0.894209	Down
CSS0000960	0.266414	0.544884	Up	HPAT1	Hydroxyproline O-arabinosyltransferase 1	GO:0005801,GO:0005768,GO:0005794,GO:0005797,GO:0000325,GO:0005886,GO:0009536,GO:0005802,GO:1990585,GO:0102562	cis-Golgi network|endosome|Golgi apparatus|Golgi medial cisterna|plant-type vacuole|plasma membrane|plastid|trans-Golgi network|hydroxyproline O-arabinosyltransferase activity|hydroxyproline O-arbinofuranose transferase activity	ko00514	Other types of O-glycan biosynthesis
CSS0000961	0.760464	0.0136691	Up	SCPL18	Serine carboxypeptidase-like 18	GO:0005576,GO:0016747,GO:0004185,GO:0006508,GO:0019748	extracellular region|acyltransferase activity, transferring groups other than amino-acyl groups|serine-type carboxypeptidase activity|proteolysis|secondary metabolic process
CSS0000962	-0.182808	0.288825	Down	ACR6	ACT domain-containing protein ACR6	GO:0016597	amino acid binding
CSS0000964	6.22104	2.92072e-05	Up	OFP6	Transcription repressor OFP6	GO:0005634,GO:0045892	nucleus|negative regulation of DNA-templated transcription
CSS0000965	-0.0784197	0.81469	Down	At5g65560	Pentatricopeptide repeat-containing protein At5g65560
CSS0000966	-0.406739	0.0711887	Down	BSL3	Serine/threonine-protein phosphatase BSL3	GO:0005634,GO:0005777,GO:0046872,GO:0017018,GO:0009742	nucleus|peroxisome|metal ion binding|myosin phosphatase activity|brassinosteroid mediated signaling pathway
CSS0000968	-0.338757	0.146832	Down	RPN13	26S proteasome regulatory subunit RPN13	GO:0005737,GO:0005634,GO:0008541,GO:0061133,GO:0070628,GO:0043130,GO:0006511	cytoplasm|nucleus|proteasome regulatory particle, lid subcomplex|endopeptidase activator activity|proteasome binding|ubiquitin binding|ubiquitin-dependent protein catabolic process	ko03050	Proteasome
CSS0000969	-0.0853267	0.88222	Down	At5g66980	Putative B3 domain-containing protein At5g66980	GO:0005634,GO:0003677,GO:0006355	nucleus|DNA binding|regulation of DNA-templated transcription
CSS0000970	4.31545	3.40498e-05	Up
CSS0000971	1.24842	0.0385468	Up	MAA3	Probable helicase MAGATAMA 3	GO:0005634,GO:0005524,GO:0004386,GO:0016787,GO:0003723,GO:0009553,GO:0010183,GO:0009875	nucleus|ATP binding|helicase activity|hydrolase activity|RNA binding|embryo sac development|pollen tube guidance|pollen-pistil interaction
CSS0000972	1.16034	0.373345	Up	GGP5	Gamma-glutamyl peptidase 5	GO:0005829,GO:0008233,GO:0006508	cytosol|peptidase activity|proteolysis
CSS0000973	0.182713	0.481728	Up	IQD31	Protein IQ-DOMAIN 31	GO:0005875,GO:0005739,GO:0005635,GO:0005886,GO:0005516	microtubule associated complex|mitochondrion|nuclear envelope|plasma membrane|calmodulin binding
CSS0000974	0.696039	0.111051	Up	SVP	MADS-box protein SVP	GO:0005634,GO:0003700,GO:0000981,GO:0000900,GO:0046983,GO:0000978,GO:0043565,GO:0030154,GO:0009908,GO:0045892,GO:0009910,GO:0045944,GO:0006357,GO:0009266	nucleus|DNA-binding transcription factor activity|DNA-binding transcription factor activity, RNA polymerase II-specific|mRNA regulatory element binding translation repressor activity|protein dimerization activity|RNA polymerase II cis-regulatory region sequence-specific DNA binding|sequence-specific DNA binding|cell differentiation|flower development|negative regulation of DNA-templated transcrip…
CSS0000976	1.25138	0.131694	Up	RABE1C	Ras-related protein RABE1c	GO:0005829,GO:0000139,GO:0043231,GO:0000325,GO:0005886,GO:0005525,GO:0003924,GO:1901527,GO:0009873,GO:0009306,GO:0017157,GO:0006904	cytosol|Golgi membrane|intracellular membrane-bounded organelle|plant-type vacuole|plasma membrane|GTP binding|GTPase activity|abscisic acid-activated signaling pathway involved in stomatal movement|ethylene-activated signaling pathway|protein secretion|regulation of exocytosis|vesicle docking involved in exocytosis	ko04144	Endocytosis
CSS0000977	-0.202828	0.782369	Down	ECA3	Calcium-transporting ATPase 3, endoplasmic reticulum-type	GO:0012505,GO:0005768,GO:0010008,GO:0005794,GO:0000139,GO:0016020,GO:0005802,GO:0015410,GO:0005524,GO:0016887,GO:0046872,GO:0005388,GO:0015662,GO:0070588,GO:0006816,GO:0006874,GO:0034220,GO:0055071,GO:0048364	endomembrane system|endosome|endosome membrane|Golgi apparatus|Golgi membrane|membrane|trans-Golgi network|ABC-type manganese transporter activity|ATP binding|ATP hydrolysis activity|metal ion binding|P-type calcium transporter activity|P-type ion transporter activity|calcium ion transmembrane transport|calcium ion transport|cellular calcium ion homeostasis|ion transmembrane transport|manganese i…	ko04148	Efferocytosis
CSS0000978	0.308557	0.345234	Up
CSS0000979	-0.0898339	0.953038	Down	AAT1	Acetyl-CoA acetyltransferase, cytosolic 1	GO:0005777,GO:0005886,GO:0009536,GO:0003985,GO:0046872,GO:0006635,GO:0008299,GO:0009846,GO:0009860,GO:0016125	peroxisome|plasma membrane|plastid|acetyl-CoA C-acetyltransferase activity|metal ion binding|fatty acid beta-oxidation|isoprenoid biosynthetic process|pollen germination|pollen tube growth|sterol metabolic process	ko00620,ko00630,ko00650,ko00071,ko00280,ko00310,ko00380,ko00900	Pyruvate metabolism|Glyoxylate and dicarboxylate metabolism|Butanoate metabolism|Fatty acid degradation|Valine, leucine and isoleucine degradation|Lysine degradation|Tryptophan metabolism|Terpenoid backbone biosynthesis
CSS0000981	-0.871822	0.584355	Down	Os06g0508700	Probable methionine--tRNA ligase	GO:0017101,GO:0005829,GO:0005524,GO:0004825,GO:0000049,GO:0006431,GO:0009791,GO:0048608	aminoacyl-tRNA synthetase multienzyme complex|cytosol|ATP binding|methionine-tRNA ligase activity|tRNA binding|methionyl-tRNA aminoacylation|post-embryonic development|reproductive structure development	ko00450,ko00970	Selenocompound metabolism|Aminoacyl-tRNA biosynthesis
CSS0000982	0.429714	0.070165	Up	PHS1	Dual specificity protein phosphatase PHS1	GO:0005737,GO:0016301,GO:0017018,GO:0004721,GO:0004725,GO:0008138,GO:0009738,GO:0043622,GO:0006470,GO:0010468,GO:0010119,GO:0009737	cytoplasm|kinase activity|myosin phosphatase activity|phosphoprotein phosphatase activity|protein tyrosine phosphatase activity|protein tyrosine/serine/threonine phosphatase activity|abscisic acid-activated signaling pathway|cortical microtubule organization|protein dephosphorylation|regulation of gene expression|regulation of stomatal movement|response to abscisic acid
CSS0000984	0.103557	0.909841	Up	At1g50180	Putative disease resistance protein At1g50180	GO:0009506,GO:0043531,GO:0005524,GO:0006952,GO:0051707	plasmodesma|ADP binding|ATP binding|defense response|response to other organism
CSS0000985	-0.335294	0.382909	Down	PCMP-E47	Pentatricopeptide repeat-containing protein At2g03380, mitochondrial	GO:0043231,GO:0005739,GO:0003723,GO:0009737,GO:0006979,GO:0009651,GO:0009451	intracellular membrane-bounded organelle|mitochondrion|RNA binding|response to abscisic acid|response to oxidative stress|response to salt stress|RNA modification
CSS0000986	0.0941566	0.724905	Up	MHF2	Protein MHF2 homolog	GO:0071821,GO:0003677,GO:0006281,GO:0007129,GO:0051382,GO:0031297,GO:0000712	FANCM-MHF complex|DNA binding|DNA repair|homologous chromosome pairing at meiosis|kinetochore assembly|replication fork processing|resolution of meiotic recombination intermediates
CSS0000987	-3.25346	0.100669	Down	GPDH	Glycerol-3-phosphate dehydrogenase [NAD(+)]	GO:0009331,GO:0047952,GO:0051287,GO:0042803,GO:0005975,GO:0046168	glycerol-3-phosphate dehydrogenase complex|glycerol-3-phosphate dehydrogenase [NAD(P)+] activity|NAD binding|protein homodimerization activity|carbohydrate metabolic process|glycerol-3-phosphate catabolic process	ko00564	Glycerophospholipid metabolism
CSS0000989	0.313231	0.0610091	Up	RPS29A	40S ribosomal protein S29	GO:0005829,GO:0022627,GO:0005886,GO:0003735,GO:0008270,GO:0006412	cytosol|cytosolic small ribosomal subunit|plasma membrane|structural constituent of ribosome|zinc ion binding|translation	ko03010	Ribosome
CSS0000990	0.228261	0.572267	Up	AAP7	Probable amino acid permease 7	GO:0016020,GO:0005886,GO:0015293,GO:0006865	membrane|plasma membrane|symporter activity|amino acid transport
CSS0000991	-3.9764	0.312928	Down	CYSEP	Vignain	GO:0031410,GO:0008234,GO:0006508	cytoplasmic vesicle|cysteine-type peptidase activity|proteolysis
CSS0000992	0.505766	0.0819613	Up	SBT1.2	Subtilisin-like protease SBT1.2	GO:0048046,GO:0009897,GO:0004252,GO:0006508,GO:0042127,GO:0010103	apoplast|external side of plasma membrane|serine-type endopeptidase activity|proteolysis|regulation of cell population proliferation|stomatal complex morphogenesis
CSS0000996	-0.564016	0.0972296	Down	TFT10	14-3-3 protein 10	GO:0005737,GO:0007165	cytoplasm|signal transduction
CSS0000997	-1.04082	0.160878	Down	CNGC1	Cyclic nucleotide-gated ion channel 1	GO:0005886,GO:0005516,GO:0030552,GO:0030553,GO:0005216	plasma membrane|calmodulin binding|cAMP binding|cGMP binding|ion channel activity	ko04626	Plant-pathogen interaction
CSS0000998	-0.941811	0.189371	Down	PCMP-H29	Pentatricopeptide repeat-containing protein At2g41080	GO:0043231,GO:0003723,GO:0008270,GO:0009451	intracellular membrane-bounded organelle|RNA binding|zinc ion binding|RNA modification
CSS0000999	-0.371599	0.15944	Down	HMGCL	Hydroxymethylglutaryl-CoA lyase, mitochondrial	GO:0005759,GO:0005739,GO:0004419,GO:0046872,GO:0046951,GO:0006552	mitochondrial matrix|mitochondrion|hydroxymethylglutaryl-CoA lyase activity|metal ion binding|ketone body biosynthetic process|leucine catabolic process	ko00650,ko00280,ko04146	Butanoate metabolism|Valine, leucine and isoleucine degradation|Peroxisome
CSS0001000	-0.266661	0.162387	Down	PREP2	Presequence protease 2, chloroplastic/mitochondrial	GO:0009507,GO:0009570,GO:0005759,GO:0005739,GO:0005634,GO:0046872,GO:0004222,GO:0016485	chloroplast|chloroplast stroma|mitochondrial matrix|mitochondrion|nucleus|metal ion binding|metalloendopeptidase activity|protein processing
CSS0001001	-0.246555	0.226554	Down	BRR2A	DExH-box ATP-dependent RNA helicase DExH12	GO:0005730,GO:0005634,GO:0005681,GO:0005524,GO:0016887,GO:0003723,GO:0003724,GO:0006397,GO:0000388,GO:0010228	nucleolus|nucleus|spliceosomal complex|ATP binding|ATP hydrolysis activity|RNA binding|RNA helicase activity|mRNA processing|spliceosome conformational change to release U4 (or U4atac) and U1 (or U11)|vegetative to reproductive phase transition of meristem	ko03040	Spliceosome
CSS0001002	-0.480172	0.275385	Down					ko03060,ko04141	Protein export|Protein processing in endoplasmic reticulum
CSS0001003	-0.324625	0.540375	Down
CSS0001007	-1.95112	0.00986591	Down	NHL6	NDR1/HIN1-like protein 6	GO:0005829,GO:0005886,GO:0009738,GO:0010116,GO:0009737,GO:0006970,GO:1902074	cytosol|plasma membrane|abscisic acid-activated signaling pathway|positive regulation of abscisic acid biosynthetic process|response to abscisic acid|response to osmotic stress|response to salt
CSS0001008	-0.254676	0.674457	Down	CCT6A	T-complex protein 1 subunit zeta 1	GO:0005832,GO:0005737,GO:0005829,GO:0005524,GO:0016887,GO:0140662,GO:0051082,GO:0006457,GO:0010043	chaperonin-containing T-complex|cytoplasm|cytosol|ATP binding|ATP hydrolysis activity|ATP-dependent protein folding chaperone|unfolded protein binding|protein folding|response to zinc ion
CSS0001009	0.471366	0.695594	Up	ABCG1	ABC transporter G family member 1	GO:0016020,GO:0140359,GO:0005524,GO:0016887,GO:0042626,GO:0010208,GO:0009624,GO:0055085	membrane|ABC-type transporter activity|ATP binding|ATP hydrolysis activity|ATPase-coupled transmembrane transporter activity|pollen wall assembly|response to nematode|transmembrane transport
CSS0001011	0.0104977	0.968789	Up	SDH7B	Succinate dehydrogenase subunit 7B, mitochondrial	GO:0005749,GO:0005739,GO:0009536,GO:0045273,GO:0043495,GO:0006099	mitochondrial respiratory chain complex II, succinate dehydrogenase complex (ubiquinone)|mitochondrion|plastid|respiratory chain complex II|protein-membrane adaptor activity|tricarboxylic acid cycle
CSS0001012	0.719979	0.611474	Up	UBC38	Putative ubiquitin-conjugating enzyme E2 38	GO:0005634,GO:0005524,GO:0061631,GO:0006301,GO:0070534,GO:0000209	nucleus|ATP binding|ubiquitin conjugating enzyme activity|postreplication repair|protein K63-linked ubiquitination|protein polyubiquitination
CSS0001014	0.294778	0.706081	Up	VPYL	Protein VAPYRIN-LIKE	GO:0005737,GO:0005634,GO:0005886	cytoplasm|nucleus|plasma membrane
CSS0001017	0.800864	0.0272472	Up
CSS0001018	1.71089	0.000308622	Up	SMXL4	Protein SMAX1-LIKE 4	GO:0005634,GO:0016787,GO:0033500,GO:0042631,GO:0010233,GO:0009651	nucleus|hydrolase activity|carbohydrate homeostasis|cellular response to water deprivation|phloem transport|response to salt stress
CSS0001019	0.0163988	0.984466	Up	RPS16-2	30S ribosomal protein S16-2, chloroplastic/mitochondrial	GO:0009507,GO:0005739,GO:0009536,GO:0015935,GO:0003735,GO:0006412	chloroplast|mitochondrion|plastid|small ribosomal subunit|structural constituent of ribosome|translation	ko03010	Ribosome
CSS0001020	3.50313	0.37459	Up	SHT	Spermidine hydroxycinnamoyl transferase	GO:0016747,GO:0016410,GO:0080074,GO:0080073,GO:0080075,GO:0080072,GO:0009555,GO:0010584,GO:0080088	acyltransferase activity, transferring groups other than amino-acyl groups|N-acyltransferase activity|spermidine:caffeoyl CoA N-acyltransferase activity|spermidine:coumaroyl CoA N-acyltransferase activity|spermidine:feruloyl CoA N-acyltransferase activity|spermidine:sinapoyl CoA N-acyltransferase activity|pollen development|pollen exine formation|spermidine hydroxycinnamate conjugate biosynthetic…	ko00940,ko00945,ko00941	Phenylpropanoid biosynthesis|Stilbenoid, diarylheptanoid and gingerol biosynthesis|Flavonoid biosynthesis
CSS0001021	-0.509767	0.0666956	Down		Cytochrome b-c1 complex subunit Rieske-2, mitochondrial	GO:0005750,GO:0051537,GO:0046872,GO:0016491,GO:0008121,GO:0006122	mitochondrial respiratory chain complex III|2 iron, 2 sulfur cluster binding|metal ion binding|oxidoreductase activity|ubiquinol-cytochrome-c reductase activity|mitochondrial electron transport, ubiquinol to cytochrome c	ko00190,ko04148	Oxidative phosphorylation|Efferocytosis
CSS0001022	-0.294612	0.183215	Down	FREE1	Protein FREE1	GO:0000813,GO:0031902,GO:0005771,GO:0005634,GO:0046872,GO:0003729,GO:0043130,GO:0009738,GO:0070676,GO:0055072,GO:0036258,GO:0009788,GO:0015031	ESCRT I complex|late endosome membrane|multivesicular body|nucleus|metal ion binding|mRNA binding|ubiquitin binding|abscisic acid-activated signaling pathway|intralumenal vesicle formation|iron ion homeostasis|multivesicular body assembly|negative regulation of abscisic acid-activated signaling pathway|protein transport
CSS0001026	0.00990249	0.991979	Up	KCS21	Probable 3-ketoacyl-CoA synthase 21	GO:0016020,GO:0102756,GO:0006633	membrane|very-long-chain 3-ketoacyl-CoA synthase activity|fatty acid biosynthetic process
CSS0001027	1.04699	0.2972	Up	ATR	Serine/threonine-protein kinase ATR	GO:0005634,GO:0009506,GO:0005524,GO:0106310,GO:0004674,GO:0006952,GO:0000077,GO:0006281,GO:0006303,GO:0051321,GO:0032504,GO:0006468,GO:0033044,GO:0031347,GO:0006282,GO:0032204,GO:0010044,GO:0010332,GO:0000723,GO:0043247,GO:0007004	nucleus|plasmodesma|ATP binding|protein serine kinase activity|protein serine/threonine kinase activity|defense response|DNA damage checkpoint signaling|DNA repair|double-strand break repair via nonhomologous end joining|meiotic cell cycle|multicellular organism reproduction|protein phosphorylation|regulation of chromosome organization|regulation of defense response|regulation of DNA repair|regul…
CSS0001029	-2.41491	0.256951	Down	CBP60B	Calmodulin-binding protein 60 B	GO:0005634,GO:0005516,GO:0003700,GO:0043565,GO:0080142	nucleus|calmodulin binding|DNA-binding transcription factor activity|sequence-specific DNA binding|regulation of salicylic acid biosynthetic process
CSS0001030	0.297211	0.432768	Up	TCX5	Protein tesmin/TSO1-like CXC 5	GO:0005634,GO:0003700,GO:0046872,GO:0006355	nucleus|DNA-binding transcription factor activity|metal ion binding|regulation of DNA-templated transcription
CSS0001033	-0.926553	0.0171615	Down	BXL4	Beta-D-xylosidase 4	GO:0048046,GO:0016020,GO:0046556,GO:0009044,GO:0031222,GO:0009627,GO:0045493	apoplast|membrane|alpha-L-arabinofuranosidase activity|xylan 1,4-beta-xylosidase activity|arabinan catabolic process|systemic acquired resistance|xylan catabolic process	ko00500,ko00460,ko00999	Starch and sucrose metabolism|Cyanoamino acid metabolism|Biosynthesis of various plant secondary metabolites
CSS0001034	0.474142	0.0223202	Up	PHS2	Alpha-glucan phosphorylase 2, cytosolic	GO:0009507,GO:0005737,GO:0005829,GO:0004645,GO:0008184,GO:0102250,GO:0030170,GO:0102499,GO:0005980,GO:0009414	chloroplast|cytoplasm|cytosol|1,4-alpha-oligoglucan phosphorylase activity|glycogen phosphorylase activity|linear malto-oligosaccharide phosphorylase activity|pyridoxal phosphate binding|SHG alpha-glucan phosphorylase activity|glycogen catabolic process|response to water deprivation	ko00500	Starch and sucrose metabolism
CSS0001037	0.14686	0.667937	Up	DJ1D	Protein DJ-1 homolog D	GO:0005829,GO:0019172,GO:0004462	cytosol|glyoxalase III activity|lactoylglutathione lyase activity	ko00620	Pyruvate metabolism
CSS0001038	2.68422	0.00829717	Up	PAP27	Probable inactive purple acid phosphatase 27	GO:0005576,GO:0003993,GO:0046872	extracellular region|acid phosphatase activity|metal ion binding
CSS0001039	-0.37004	0.154031	Down
CSS0001041	6.07364	0.000332217	Up	At3g47200	UPF0481 protein At3g47200	GO:0005886	plasma membrane
CSS0001042	-2.77751	0.0416028	Down
CSS0001043	-0.563385	0.682262	Down	AtMg01250	Uncharacterized mitochondrial protein AtMg01250	GO:0005739	mitochondrion
CSS0001044	0.589417	0.099103	Up	TEN1	CST complex subunit TEN1	GO:0000781,GO:1990879,GO:0044183,GO:0003697,GO:0010521,GO:0042162,GO:0032211,GO:0009408,GO:0048367,GO:0019827,GO:0000723	chromosome, telomeric region|CST complex|protein folding chaperone|single-stranded DNA binding|telomerase inhibitor activity|telomeric DNA binding|negative regulation of telomere maintenance via telomerase|response to heat|shoot system development|stem cell population maintenance|telomere maintenance
CSS0001045	-0.118171	0.474655	Down	B''BETA	Serine/threonine protein phosphatase 2A regulatory subunit B''beta	GO:0000159,GO:0005509,GO:0019888,GO:0006470	protein phosphatase type 2A complex|calcium ion binding|protein phosphatase regulator activity|protein dephosphorylation	ko03015	mRNA surveillance pathway
CSS0001046	0.841712	0.213121	Up	GLX1	Lactoylglutathione lyase GLX1	GO:0009941,GO:0005737,GO:0005829,GO:0005576,GO:0005777,GO:0000325,GO:0099503,GO:0051213,GO:0004462,GO:0046872,GO:0019243	chloroplast envelope|cytoplasm|cytosol|extracellular region|peroxisome|plant-type vacuole|secretory vesicle|dioxygenase activity|lactoylglutathione lyase activity|metal ion binding|methylglyoxal catabolic process to D-lactate via S-lactoyl-glutathione	ko00620	Pyruvate metabolism
CSS0001049	-1.61707	0.225616	Down	PAR	Phenylacetaldehyde reductase	GO:0016491	oxidoreductase activity
CSS0001050	-0.138764	0.563901	Down
CSS0001051	3.51912	0.105449	Up	OFP6	Transcription repressor OFP6	GO:0005634,GO:0045892	nucleus|negative regulation of DNA-templated transcription
CSS0001052	-5.7422	3.08899e-05	Down	BON3	Protein BONZAI 3	GO:0005886,GO:0005544,GO:0046872,GO:0071277,GO:0006952,GO:0060548,GO:0090332	plasma membrane|calcium-dependent phospholipid binding|metal ion binding|cellular response to calcium ion|defense response|negative regulation of cell death|stomatal closure
CSS0001053	-1.59273	0.143518	Down	At3g28040	Probably inactive leucine-rich repeat receptor-like protein kinase At3g28040	GO:0005886,GO:0005524,GO:0004672,GO:0006468	plasma membrane|ATP binding|protein kinase activity|protein phosphorylation
CSS0001054	-0.453749	0.0777461	Down	FREE1	Protein FREE1	GO:0000813,GO:0031902,GO:0005771,GO:0005634,GO:0046872,GO:0003729,GO:0043130,GO:0009738,GO:0070676,GO:0055072,GO:0036258,GO:0009788,GO:0015031	ESCRT I complex|late endosome membrane|multivesicular body|nucleus|metal ion binding|mRNA binding|ubiquitin binding|abscisic acid-activated signaling pathway|intralumenal vesicle formation|iron ion homeostasis|multivesicular body assembly|negative regulation of abscisic acid-activated signaling pathway|protein transport
CSS0001057	-0.4215	0.180209	Down	ETFQO	Electron transfer flavoprotein-ubiquinone oxidoreductase, mitochondrial	GO:0005829,GO:0005743,GO:0005739,GO:0051539,GO:0004174,GO:0046872,GO:0010230,GO:0022900,GO:0006552,GO:0009646	cytosol|mitochondrial inner membrane|mitochondrion|4 iron, 4 sulfur cluster binding|electron-transferring-flavoprotein dehydrogenase activity|metal ion binding|alternative respiration|electron transport chain|leucine catabolic process|response to absence of light
CSS0001059	3.13032	1.62571e-11	Up	LNG1	Protein LONGIFOLIA 1	GO:0005829,GO:0005634,GO:0051513,GO:0009826	cytosol|nucleus|regulation of monopolar cell growth|unidimensional cell growth
CSS0001060	-3.38236	0.0606019	Down	BRH1	Brassinosteroid-responsive RING protein 1	GO:0016020,GO:0061630,GO:0008270,GO:0009742,GO:0016567,GO:1901371,GO:1905421,GO:0009741,GO:0010200	membrane|ubiquitin protein ligase activity|zinc ion binding|brassinosteroid mediated signaling pathway|protein ubiquitination|regulation of leaf morphogenesis|regulation of plant organ morphogenesis|response to brassinosteroid|response to chitin
CSS0001061	1.86643	0.344437	Up	CCD1	Carotenoid 9,10(9',10')-cleavage dioxygenase 1	GO:0009570,GO:0005737,GO:0005829,GO:0005794,GO:0000325,GO:0005886,GO:0009506,GO:0045549,GO:0010436,GO:0046872,GO:0016121,GO:0016118,GO:0016124	chloroplast stroma|cytoplasm|cytosol|Golgi apparatus|plant-type vacuole|plasma membrane|plasmodesma|9-cis-epoxycarotenoid dioxygenase activity|carotenoid dioxygenase activity|metal ion binding|carotene catabolic process|carotenoid catabolic process|xanthophyll catabolic process
CSS0001062	1.89253	0.000360537	Up	GXM3	Glucuronoxylan 4-O-methyltransferase 3	GO:0005794,GO:0000139,GO:0030775,GO:0009808,GO:0032259,GO:0009834,GO:0005976,GO:0045492,GO:0045491	Golgi apparatus|Golgi membrane|glucuronoxylan 4-O-methyltransferase activity|lignin metabolic process|methylation|plant-type secondary cell wall biogenesis|polysaccharide metabolic process|xylan biosynthetic process|xylan metabolic process
CSS0001063	0.472138	0.705628	Up
CSS0001064	-1.45385	0.07908	Down
CSS0001065	-0.100713	0.859824	Down	At3g14580	Pentatricopeptide repeat-containing protein At3g14580, mitochondrial	GO:0005739	mitochondrion
CSS0001066	6.15175	0.000227768	Up
CSS0001067	2.76935	0.236519	Up	MUCI70	Probable hexosyltransferase MUCI70	GO:0005794,GO:0000139,GO:0016757,GO:0080001,GO:0048358,GO:0010246,GO:0045491	Golgi apparatus|Golgi membrane|glycosyltransferase activity|mucilage extrusion from seed coat|mucilage pectin biosynthetic process|rhamnogalacturonan I biosynthetic process|xylan metabolic process
CSS0001068	0.963974	0.44538	Up	SUFE1	SufE-like protein 1, chloroplastic/mitochondrial	GO:0009507,GO:0009570,GO:0005829,GO:0005739,GO:0008047,GO:0009793	chloroplast|chloroplast stroma|cytosol|mitochondrion|enzyme activator activity|embryo development ending in seed dormancy
CSS0001070	-0.459627	0.0978743	Down					ko04626	Plant-pathogen interaction
CSS0001071	1.96647	0.073217	Up	EMB2758	Pentatricopeptide repeat-containing protein At4g33990	GO:0003723,GO:0008270,GO:0009451	RNA binding|zinc ion binding|RNA modification
CSS0001072	-1.55998	0.00444248	Down	MED33A	Mediator of RNA polymerase II transcription subunit 33A	GO:0016592,GO:0009698,GO:2000762	mediator complex|phenylpropanoid metabolic process|regulation of phenylpropanoid metabolic process
CSS0001073	0.339064	0.23191	Up	GFS12	Protein GFS12	GO:0080008,GO:0005524,GO:0004672,GO:0042742,GO:0006468,GO:0006623	Cul4-RING E3 ubiquitin ligase complex|ATP binding|protein kinase activity|defense response to bacterium|protein phosphorylation|protein targeting to vacuole
CSS0001074	-0.0929336	0.808537	Down	AKRP	Ankyrin repeat domain-containing protein, chloroplastic	GO:0009507,GO:0140693	chloroplast|molecular condensate scaffold activity
CSS0001075	0.243856	0.483426	Up	petC	Cytochrome b6-f complex iron-sulfur subunit, chloroplastic	GO:0009535,GO:0051537,GO:0045158,GO:0046872,GO:0009496	chloroplast thylakoid membrane|2 iron, 2 sulfur cluster binding|electron transporter, transferring electrons within cytochrome b6/f complex of photosystem II activity|metal ion binding|plastoquinol--plastocyanin reductase activity
CSS0001076	0.0272098	0.871153	Up	ASK21	SKP1-like protein 21	GO:0005737,GO:0005634,GO:0019005,GO:0097602,GO:0009734,GO:0009867,GO:0016567,GO:0009733,GO:0009753,GO:0031146	cytoplasm|nucleus|SCF ubiquitin ligase complex|cullin family protein binding|auxin-activated signaling pathway|jasmonic acid mediated signaling pathway|protein ubiquitination|response to auxin|response to jasmonic acid|SCF-dependent proteasomal ubiquitin-dependent protein catabolic process
CSS0001077	0.299184	0.339637	Up	AIRP2	E3 ubiquitin-protein ligase AIRP2	GO:0005829,GO:0046872,GO:0061630,GO:0004842,GO:0009789,GO:0016567,GO:0009737,GO:0009651,GO:0006511	cytosol|metal ion binding|ubiquitin protein ligase activity|ubiquitin-protein transferase activity|positive regulation of abscisic acid-activated signaling pathway|protein ubiquitination|response to abscisic acid|response to salt stress|ubiquitin-dependent protein catabolic process
CSS0001079	-0.290187	0.484886	Down	ABI1	Protein phosphatase 2C 56	GO:0005737,GO:0005634,GO:0005886,GO:0019900,GO:0046872,GO:0017018,GO:0016791,GO:0004721,GO:0019901,GO:0004722,GO:0009738,GO:0009788,GO:0035970,GO:0006470,GO:0009787,GO:0010119,GO:0009737,GO:0009409,GO:0009408	cytoplasm|nucleus|plasma membrane|kinase binding|metal ion binding|myosin phosphatase activity|phosphatase activity|phosphoprotein phosphatase activity|protein kinase binding|protein serine/threonine phosphatase activity|abscisic acid-activated signaling pathway|negative regulation of abscisic acid-activated signaling pathway|peptidyl-threonine dephosphorylation|protein dephosphorylation|regulati…	ko04016,ko04075	MAPK signaling pathway - plant|Plant hormone signal transduction
CSS0001080	1.6883	0.0186307	Up	AVT1I	Amino acid transporter AVT1I	GO:0016020,GO:0000325,GO:0015171,GO:0003333	membrane|plant-type vacuole|amino acid transmembrane transporter activity|amino acid transmembrane transport
CSS0001081	6.00837	9.7713e-14	Up	PME34	Probable pectinesterase/pectinesterase inhibitor 34	GO:0009505,GO:0005886,GO:0045330,GO:0030599,GO:0046910,GO:0042545,GO:0045490,GO:0010119	plant-type cell wall|plasma membrane|aspartyl esterase activity|pectinesterase activity|pectinesterase inhibitor activity|cell wall modification|pectin catabolic process|regulation of stomatal movement
CSS0001082	-0.826417	0.121796	Down	APY4	Probable apyrase 4	GO:0016020,GO:0005524,GO:0017110,GO:0009134	membrane|ATP binding|nucleoside diphosphate phosphatase activity|nucleoside diphosphate catabolic process	ko00230,ko00240	Purine metabolism|Pyrimidine metabolism
CSS0001083	-0.0932959	0.666751	Down	VPS52	Vacuolar protein sorting-associated protein 52 A	GO:0005829,GO:0012505,GO:0010008,GO:0000938,GO:0005794,GO:0000139,GO:0019905,GO:0032456,GO:0006896,GO:0009860,GO:0015031,GO:0042147,GO:0019953	cytosol|endomembrane system|endosome membrane|GARP complex|Golgi apparatus|Golgi membrane|syntaxin binding|endocytic recycling|Golgi to vacuole transport|pollen tube growth|protein transport|retrograde transport, endosome to Golgi|sexual reproduction
CSS0001084	0.982956	0.412982	Up	RPM1	Disease resistance protein RPM1	GO:0012505,GO:0031234,GO:0005886,GO:0043531,GO:0005524,GO:0000166,GO:0009626	endomembrane system|extrinsic component of cytoplasmic side of plasma membrane|plasma membrane|ADP binding|ATP binding|nucleotide binding|plant-type hypersensitive response	ko04626	Plant-pathogen interaction
CSS0001085	-0.224862	0.397514	Down	SMC1	Structural maintenance of chromosomes protein 1	GO:0008278,GO:0005634,GO:0005524,GO:0016887,GO:0003677,GO:0051301,GO:0007059,GO:0006281,GO:0051321,GO:0007062	cohesin complex|nucleus|ATP binding|ATP hydrolysis activity|DNA binding|cell division|chromosome segregation|DNA repair|meiotic cell cycle|sister chromatid cohesion
CSS0001087	0.592467	0.464532	Up	ZAT10	Zinc finger protein ZAT10	GO:0005634,GO:0003700,GO:0046872,GO:0043565,GO:0000976,GO:0071456,GO:0035264,GO:0045892,GO:0010117,GO:0015979,GO:0009737,GO:0010200,GO:0009409,GO:0009644,GO:0006979,GO:0009651,GO:0009414,GO:0009611	nucleus|DNA-binding transcription factor activity|metal ion binding|sequence-specific DNA binding|transcription cis-regulatory region binding|cellular response to hypoxia|multicellular organism growth|negative regulation of DNA-templated transcription|photoprotection|photosynthesis|response to abscisic acid|response to chitin|response to cold|response to high light intensity|response to oxidative…
CSS0001088	-0.113765	0.712499	Down	At3g27910	Putative F-box/kelch-repeat protein At3g27910
CSS0001089	0.32678	0.553275	Up	PPTase	Phosphopantetheinyl transferase	GO:0005829,GO:0008897,GO:0000287,GO:0006633	cytosol|holo-[acyl-carrier-protein] synthase activity|magnesium ion binding|fatty acid biosynthetic process	ko00770	Pantothenate and CoA biosynthesis
CSS0001092	1.57686	0.576239	Up		Glycosyl hydrolase 5 family protein	GO:0004553,GO:0005975	hydrolase activity, hydrolyzing O-glycosyl compounds|carbohydrate metabolic process
CSS0001093	-1.23429	0.00177082	Down	RPN11	26S proteasome non-ATPase regulatory subunit 14 homolog	GO:0005634,GO:0000502,GO:0008541,GO:0046872,GO:0008237,GO:0070628,GO:0043161,GO:0030163,GO:0016579	nucleus|proteasome complex|proteasome regulatory particle, lid subcomplex|metal ion binding|metallopeptidase activity|proteasome binding|proteasome-mediated ubiquitin-dependent protein catabolic process|protein catabolic process|protein deubiquitination	ko03050	Proteasome
CSS0001094	2.02591	0.00033461	Up
CSS0001095	1.2465	0.358476	Up		Ferredoxin-thioredoxin reductase catalytic chain, chloroplastic	GO:0009507,GO:0051539,GO:0009055,GO:0103012,GO:0046872,GO:0016730	chloroplast|4 iron, 4 sulfur cluster binding|electron transfer activity|ferredoxin-thioredoxin reductase activity|metal ion binding|oxidoreductase activity, acting on iron-sulfur proteins as donors
CSS0001096	-0.79469	0.362422	Down	PP2A13	F-box protein PP2-A13	GO:0005634,GO:0016567	nucleus|protein ubiquitination
CSS0001097	0.264787	0.351845	Up	IDM1	Increased DNA methylation 1	GO:0005634,GO:0009506,GO:0010385,GO:0004402,GO:0042393,GO:0046872,GO:0080188,GO:0044154,GO:0043971,GO:0043972,GO:0044030	nucleus|plasmodesma|double-stranded methylated DNA binding|histone acetyltransferase activity|histone binding|metal ion binding|gene silencing by RNA-directed DNA methylation|histone H3-K14 acetylation|histone H3-K18 acetylation|histone H3-K23 acetylation|regulation of DNA methylation
CSS0001101	4.52577	0.000136098	Up	LAC11	Laccase-11	GO:0048046,GO:0005507,GO:0052716,GO:0016491,GO:0009809,GO:0046274	apoplast|copper ion binding|hydroquinone:oxygen oxidoreductase activity|oxidoreductase activity|lignin biosynthetic process|lignin catabolic process
CSS0001102	2.83944	1.31332e-05	Up	ATHB-13	Homeobox-leucine zipper protein ATHB-13	GO:0005634,GO:0003700,GO:0000981,GO:0043565,GO:0000976,GO:0048826,GO:0009965,GO:0045893,GO:0080022,GO:0009744	nucleus|DNA-binding transcription factor activity|DNA-binding transcription factor activity, RNA polymerase II-specific|sequence-specific DNA binding|transcription cis-regulatory region binding|cotyledon morphogenesis|leaf morphogenesis|positive regulation of DNA-templated transcription|primary root development|response to sucrose
CSS0001103	-0.930505	0.0841933	Down	At2g40090	Putative ABC1 protein At2g40090	GO:0005743,GO:0031966,GO:0055088,GO:0007005	mitochondrial inner membrane|mitochondrial membrane|lipid homeostasis|mitochondrion organization
CSS0001104	-0.931208	9.50746e-06	Down	AIM1	Peroxisomal fatty acid beta-oxidation multifunctional protein AIM1	GO:0005777,GO:0009505,GO:0005886,GO:0009506,GO:0003857,GO:0008692,GO:0004165,GO:0004300,GO:0070403,GO:0006635,GO:0009908,GO:0009695	peroxisome|plant-type cell wall|plasma membrane|plasmodesma|3-hydroxyacyl-CoA dehydrogenase activity|3-hydroxybutyryl-CoA epimerase activity|delta(3)-delta(2)-enoyl-CoA isomerase activity|enoyl-CoA hydratase activity|NAD+ binding|fatty acid beta-oxidation|flower development|jasmonic acid biosynthetic process	ko00071,ko00592	Fatty acid degradation|alpha-Linolenic acid metabolism
CSS0001105	1.14471	0.335481	Up	TPI	Triosephosphate isomerase, chloroplastic	GO:0009507,GO:0004807,GO:0006096,GO:0019253	chloroplast|triose-phosphate isomerase activity|glycolytic process|reductive pentose-phosphate cycle	ko00010,ko00051,ko00562,ko00710	Glycolysis / Gluconeogenesis|Fructose and mannose metabolism|Inositol phosphate metabolism|Carbon fixation in photosynthetic organisms
CSS0001107	0.208829	0.801202	Up	GOLS2	Galactinol synthase 2	GO:0005737,GO:0016757,GO:0047216,GO:0046872,GO:0006012	cytoplasm|glycosyltransferase activity|inositol 3-alpha-galactosyltransferase activity|metal ion binding|galactose metabolic process	ko00052	Galactose metabolism
CSS0001108	-0.221176	0.754882	Down
CSS0001109	-0.189911	0.899029	Down	HSC-2	Heat shock cognate 70 kDa protein 2	GO:0005737,GO:0005524,GO:0016887,GO:0140662,GO:0031072,GO:0051787,GO:0044183,GO:0051082,GO:0034620,GO:0051085,GO:0042026	cytoplasm|ATP binding|ATP hydrolysis activity|ATP-dependent protein folding chaperone|heat shock protein binding|misfolded protein binding|protein folding chaperone|unfolded protein binding|cellular response to unfolded protein|chaperone cofactor-dependent protein refolding|protein refolding	ko03040,ko04141,ko04144	Spliceosome|Protein processing in endoplasmic reticulum|Endocytosis
CSS0001110	4.55552	0.0592332	Up	SCPL20	Serine carboxypeptidase-like 20	GO:0005576,GO:0005777,GO:0000325,GO:0016747,GO:0004185,GO:0006508,GO:0019748	extracellular region|peroxisome|plant-type vacuole|acyltransferase activity, transferring groups other than amino-acyl groups|serine-type carboxypeptidase activity|proteolysis|secondary metabolic process
CSS0001112	-0.551454	0.1597	Down
CSS0001116	0.965601	0.351906	Up
CSS0001118	0.589993	0.27157	Up	UBP20	Ubiquitin carboxyl-terminal hydrolase 20	GO:0005829,GO:0005634,GO:0004843,GO:0004197,GO:0016579,GO:0006511	cytosol|nucleus|cysteine-type deubiquitinase activity|cysteine-type endopeptidase activity|protein deubiquitination|ubiquitin-dependent protein catabolic process
CSS0001119	1.54702	0.0251744	Up	ATL54	RING-H2 finger protein ATL54	GO:0016020,GO:0046872,GO:0004842,GO:0016567	membrane|metal ion binding|ubiquitin-protein transferase activity|protein ubiquitination
CSS0001120	0.361499	0.169048	Up
CSS0001121	3.58549	0.363205	Up	At1g48100	Polygalacturonase At1g48100	GO:0005576,GO:0004650,GO:0005975,GO:0009831	extracellular region|polygalacturonase activity|carbohydrate metabolic process|plant-type cell wall modification involved in multidimensional cell growth	ko00040	Pentose and glucuronate interconversions
CSS0001122	-1.20745	0.0541126	Down	EIF-5A2	Eukaryotic translation initiation factor 5A-2	GO:0043022,GO:0003723,GO:0003746,GO:0003743,GO:0045901,GO:0045905	ribosome binding|RNA binding|translation elongation factor activity|translation initiation factor activity|positive regulation of translational elongation|positive regulation of translational termination
CSS0001123	-0.648761	0.469957	Down	GPX8	Probable glutathione peroxidase 8	GO:0005829,GO:0005634,GO:0004602,GO:0004601,GO:0006979	cytosol|nucleus|glutathione peroxidase activity|peroxidase activity|response to oxidative stress	ko00480	Glutathione metabolism
CSS0001125	3.45827	8.28521e-12	Up	PME18	Pectinesterase/pectinesterase inhibitor 18	GO:0005576,GO:0016020,GO:0000325,GO:0045330,GO:0030599,GO:0046910,GO:0030598,GO:0090729,GO:0042545,GO:0050832,GO:0031640,GO:0017148,GO:0045490,GO:0009617	extracellular region|membrane|plant-type vacuole|aspartyl esterase activity|pectinesterase activity|pectinesterase inhibitor activity|rRNA N-glycosylase activity|toxin activity|cell wall modification|defense response to fungus|killing of cells of another organism|negative regulation of translation|pectin catabolic process|response to bacterium	ko00040	Pentose and glucuronate interconversions
CSS0001128	-0.0791255	0.864048	Down
CSS0001129	0.365963	0.628025	Up
CSS0001130	-0.289443	0.487853	Down	OTU3	OVARIAN TUMOR DOMAIN-containing deubiquitinating enzyme 3	GO:0004843,GO:0030968,GO:0016579,GO:0030433	cysteine-type deubiquitinase activity|endoplasmic reticulum unfolded protein response|protein deubiquitination|ubiquitin-dependent ERAD pathway
CSS0001131	-0.936361	0.00101769	Down	DNAJ1	DnaJ protein homolog	GO:0005886,GO:0005524,GO:0030544,GO:0046872,GO:0051082,GO:0006457,GO:0009408	plasma membrane|ATP binding|Hsp70 protein binding|metal ion binding|unfolded protein binding|protein folding|response to heat	ko04141	Protein processing in endoplasmic reticulum
CSS0001132	-0.129816	0.512833	Down	PAPS2	Nuclear poly(A) polymerase 2	GO:0005737,GO:0005634,GO:0005524,GO:0046872,GO:0004652,GO:0003723,GO:0006378,GO:0043631	cytoplasm|nucleus|ATP binding|metal ion binding|polynucleotide adenylyltransferase activity|RNA binding|mRNA polyadenylation|RNA polyadenylation	ko03015	mRNA surveillance pathway
CSS0001133	4.46551	0.0262108	Up	ABCG34	ABC transporter G family member 34	GO:0005886,GO:0140359,GO:0005524	plasma membrane|ABC-type transporter activity|ATP binding	ko02010	ABC transporters
CSS0001134	0.0212684	0.987631	Up
CSS0001135	0.497124	0.183348	Up	GCP3	Gamma-tubulin complex component 3	GO:0005938,GO:0055028,GO:0005737,GO:0009898,GO:0000923,GO:0000930,GO:0008275,GO:0005874,GO:0005635,GO:0005819,GO:0000922,GO:0043015,GO:0015631,GO:0031122,GO:0051321,GO:0007020,GO:0000278,GO:0090063,GO:0009624,GO:0051225	cell cortex|cortical microtubule|cytoplasm|cytoplasmic side of plasma membrane|equatorial microtubule organizing center|gamma-tubulin complex|gamma-tubulin small complex|microtubule|nuclear envelope|spindle|spindle pole|gamma-tubulin binding|tubulin binding|cytoplasmic microtubule organization|meiotic cell cycle|microtubule nucleation|mitotic cell cycle|positive regulation of microtubule nucleati…
CSS0001136	-0.413126	0.263385	Down	UBP23	Ubiquitin carboxyl-terminal hydrolase 23	GO:0005829,GO:0005634,GO:0004843,GO:0004197,GO:0016579,GO:0006511	cytosol|nucleus|cysteine-type deubiquitinase activity|cysteine-type endopeptidase activity|protein deubiquitination|ubiquitin-dependent protein catabolic process
CSS0001138	-0.42859	0.303663	Down
CSS0001142	1.02324	0.0026062	Up	DTWD2A	tRNA-uridine aminocarboxypropyltransferase A	GO:0046872,GO:0016432,GO:0008033	metal ion binding|tRNA-uridine aminocarboxypropyltransferase activity|tRNA processing
CSS0001146	-0.72646	0.0148861	Down	SMXL6	Protein SMAX1-LIKE 6	GO:0005634,GO:1902347	nucleus|response to strigolactone
CSS0001147	-0.0257682	0.945341	Down	TTL	TITAN-like protein	GO:0005634,GO:0046872,GO:0009793,GO:0009960	nucleus|metal ion binding|embryo development ending in seed dormancy|endosperm development
CSS0001149	7.30011	0.00537865	Up	ABCG8	ABC transporter G family member 8	GO:0016020,GO:0140359,GO:0005524,GO:0016887,GO:0042626,GO:0055085	membrane|ABC-type transporter activity|ATP binding|ATP hydrolysis activity|ATPase-coupled transmembrane transporter activity|transmembrane transport	ko02010	ABC transporters
CSS0001152	1.13663	0.0661906	Up	NUDT26	Nudix hydrolase 26, chloroplastic	GO:0009507,GO:0034432,GO:0008893,GO:0046872,GO:0006753,GO:0019693	chloroplast|bis(5'-adenosyl)-pentaphosphatase activity|guanosine-3',5'-bis(diphosphate) 3'-diphosphatase activity|metal ion binding|nucleoside phosphate metabolic process|ribose phosphate metabolic process
CSS0001153	0.571445	0.066541	Up	SETH3	Probable arabinose 5-phosphate isomerase	GO:0019146,GO:0005524,GO:1901135,GO:0005975	arabinose-5-phosphate isomerase activity|ATP binding|carbohydrate derivative metabolic process|carbohydrate metabolic process
CSS0001154	2.0964	0.249849	Up
CSS0001156	-1.93211	0.0404022	Down	SD129	G-type lectin S-receptor-like serine/threonine-protein kinase SD1-29	GO:0005886,GO:0005524,GO:0005516,GO:0030246,GO:0038187,GO:0004672,GO:0106310,GO:0004674,GO:0004712,GO:0004713,GO:0031625,GO:0032497,GO:0045087,GO:0031663,GO:0002221,GO:0046777,GO:0006468,GO:0048544	plasma membrane|ATP binding|calmodulin binding|carbohydrate binding|pattern recognition receptor activity|protein kinase activity|protein serine kinase activity|protein serine/threonine kinase activity|protein serine/threonine/tyrosine kinase activity|protein tyrosine kinase activity|ubiquitin protein ligase binding|detection of lipopolysaccharide|innate immune response|lipopolysaccharide-mediate…
CSS0001158	-0.256013	0.754266	Down	PCMP-E70	Pentatricopeptide repeat-containing protein At1g09190	GO:0003723,GO:0009451	RNA binding|RNA modification
CSS0001159	-0.0940775	0.879818	Down	BTR1	Protein BTR1	GO:0005737,GO:0005829,GO:0005886,GO:0003729,GO:0003727,GO:0046719,GO:0010468,GO:0008380	cytoplasm|cytosol|plasma membrane|mRNA binding|single-stranded RNA binding|regulation by virus of viral protein levels in host cell|regulation of gene expression|RNA splicing
CSS0001160	-0.741539	0.10067	Down	HIT4	Protein HEAT INTOLERANT 4	GO:0010369,GO:0005730,GO:0010286,GO:0045814,GO:0031452,GO:1900034,GO:0009408	chromocenter|nucleolus|heat acclimation|negative regulation of gene expression, epigenetic|negative regulation of heterochromatin formation|regulation of cellular response to heat|response to heat
CSS0001161	-2.38929	0.0105387	Down
CSS0001162	0.426198	0.283284	Up
CSS0001165	0.187106	0.589772	Up	At2g35130	Pentatricopeptide repeat-containing protein At2g35130
CSS0001166	-2.23703	0.00151451	Down	DREB2A	Dehydration-responsive element-binding protein 2A	GO:0005634,GO:0003677,GO:0003700	nucleus|DNA binding|DNA-binding transcription factor activity
CSS0001167	-0.0363416	0.900264	Down	TPP1	Thylakoidal processing peptidase 1, chloroplastic	GO:0009534,GO:0009535,GO:0005886,GO:0004175,GO:0004252,GO:0006465,GO:0010027	chloroplast thylakoid|chloroplast thylakoid membrane|plasma membrane|endopeptidase activity|serine-type endopeptidase activity|signal peptide processing|thylakoid membrane organization	ko03060	Protein export
CSS0001168	1.03053	0.390259	Up	FAX4	Protein FATTY ACID EXPORT 4, chloroplastic	GO:0031969,GO:0016020,GO:0009793,GO:1905885	chloroplast membrane|membrane|embryo development ending in seed dormancy|positive regulation of triglyceride transport
CSS0001170	-0.197234	0.843189	Down	ACD6	Protein ACCELERATED CELL DEATH 6	GO:0005789,GO:0016020,GO:0005886,GO:0008219,GO:0071446,GO:0042742,GO:1900426,GO:1902290,GO:0016567,GO:1900150,GO:2000031,GO:0009617,GO:0050826,GO:0009416,GO:0009751,GO:0009615	endoplasmic reticulum membrane|membrane|plasma membrane|cell death|cellular response to salicylic acid stimulus|defense response to bacterium|positive regulation of defense response to bacterium|positive regulation of defense response to oomycetes|protein ubiquitination|regulation of defense response to fungus|regulation of salicylic acid mediated signaling pathway|response to bacterium|response …
CSS0001172	-1.59123	0.0395502	Down	BGLU6	Beta-glucosidase 6	GO:0005576,GO:0033907,GO:0004565,GO:0080083,GO:0008422,GO:0080079,GO:0042973,GO:0016798,GO:0102483,GO:0005975	extracellular region|beta-D-fucosidase activity|beta-galactosidase activity|beta-gentiobiose beta-glucosidase activity|beta-glucosidase activity|cellobiose glucosidase activity|glucan endo-1,3-beta-D-glucosidase activity|hydrolase activity, acting on glycosyl bonds|scopolin beta-glucosidase activity|carbohydrate metabolic process	ko00500,ko00460,ko00999	Starch and sucrose metabolism|Cyanoamino acid metabolism|Biosynthesis of various plant secondary metabolites
CSS0001173	0.287157	0.802959	Up
CSS0001175	0.194097	0.763736	Up	SLY1	SEC1 family transport protein SLY1	GO:0000139,GO:0005739,GO:0019905,GO:0006888,GO:0006886,GO:0016192	Golgi membrane|mitochondrion|syntaxin binding|endoplasmic reticulum to Golgi vesicle-mediated transport|intracellular protein transport|vesicle-mediated transport
CSS0001176	-0.130414	0.678179	Down	RPL36B	60S ribosomal protein L36-2	GO:0005829,GO:0022625,GO:0022626,GO:0000325,GO:0003735,GO:0002181	cytosol|cytosolic large ribosomal subunit|cytosolic ribosome|plant-type vacuole|structural constituent of ribosome|cytoplasmic translation	ko03010	Ribosome
CSS0001177	0.242914	0.721182	Up	AGT1	Serine--glyoxylate aminotransferase	GO:0048046,GO:0009507,GO:0009570,GO:0005829,GO:0005739,GO:0005777,GO:0005886,GO:0008453,GO:0003729,GO:0050281,GO:0004760,GO:0019265,GO:0009853	apoplast|chloroplast|chloroplast stroma|cytosol|mitochondrion|peroxisome|plasma membrane|alanine-glyoxylate transaminase activity|mRNA binding|serine-glyoxylate transaminase activity|serine-pyruvate transaminase activity|glycine biosynthetic process, by transamination of glyoxylate|photorespiration	ko00630,ko00250,ko00260,ko04146	Glyoxylate and dicarboxylate metabolism|Alanine, aspartate and glutamate metabolism|Glycine, serine and threonine metabolism|Peroxisome
CSS0001178	-4.78537	0.222896	Down		RNA-directed DNA polymerase homolog	GO:0005739,GO:0003968,GO:0003964	mitochondrion|RNA-dependent RNA polymerase activity|RNA-directed DNA polymerase activity
CSS0001180	0.478311	0.507017	Up	OBGL	GTP-binding protein OBGC, chloroplastic	GO:0009507,GO:0009706,GO:0009570,GO:0005739,GO:0005525,GO:0003924,GO:0000287,GO:0003729,GO:0009658,GO:0009793,GO:0009416,GO:0006364,GO:0010027	chloroplast|chloroplast inner membrane|chloroplast stroma|mitochondrion|GTP binding|GTPase activity|magnesium ion binding|mRNA binding|chloroplast organization|embryo development ending in seed dormancy|response to light stimulus|rRNA processing|thylakoid membrane organization
CSS0001181	-0.746026	0.0638644	Down
CSS0001182	0.0465507	0.971683	Up		Profilin-2	GO:0005737,GO:0005856,GO:0003779	cytoplasm|cytoskeleton|actin binding
CSS0001183	0.123034	0.848867	Up
CSS0001184	-5.88459	0.132895	Down	At4g34880	Probable amidase At4g34880	GO:0004040,GO:0043864	amidase activity|indoleacetamide hydrolase activity	ko00330,ko00360,ko00380	Arginine and proline metabolism|Phenylalanine metabolism|Tryptophan metabolism
CSS0001185	0.444204	0.227376	Up	LPD2	Dihydrolipoyl dehydrogenase 2, chloroplastic	GO:0009507,GO:0009941,GO:0009570,GO:0005829,GO:0004148,GO:0050660,GO:0046685	chloroplast|chloroplast envelope|chloroplast stroma|cytosol|dihydrolipoyl dehydrogenase activity|flavin adenine dinucleotide binding|response to arsenic-containing substance	ko00010,ko00020,ko00620,ko00630,ko00640,ko00260,ko00280,ko00310,ko00380,ko00785	Glycolysis / Gluconeogenesis|Citrate cycle (TCA cycle)|Pyruvate metabolism|Glyoxylate and dicarboxylate metabolism|Propanoate metabolism|Glycine, serine and threonine metabolism|Valine, leucine and isoleucine degradation|Lysine degradation|Tryptophan metabolism|Lipoic acid metabolism
CSS0001186	0.0415213	0.90988	Up		Thioredoxin M-type, chloroplastic	GO:0009507,GO:0015035	chloroplast|protein-disulfide reductase activity	ko03008	Ribosome biogenesis in eukaryotes
CSS0001187	0.272833	0.502039	Up	DUF6	DUF724 domain-containing protein 6	GO:0005634	nucleus
CSS0001188	-0.818444	0.117587	Down	SPP	Signal peptide peptidase	GO:0098554,GO:0005783,GO:0005789,GO:0098553,GO:0042500,GO:0033619,GO:0009555,GO:0009846,GO:0006465	cytoplasmic side of endoplasmic reticulum membrane|endoplasmic reticulum|endoplasmic reticulum membrane|lumenal side of endoplasmic reticulum membrane|aspartic endopeptidase activity, intramembrane cleaving|membrane protein proteolysis|pollen development|pollen germination|signal peptide processing
CSS0001189	0.146941	0.511486	Up	ENAP2	Trihelix transcription factor ENAP2	GO:0005654,GO:0005634,GO:0003677,GO:0009873,GO:0010468	nucleoplasm|nucleus|DNA binding|ethylene-activated signaling pathway|regulation of gene expression
CSS0001190	-0.338863	0.383269	Down	At2g01600	Putative clathrin assembly protein At2g01600	GO:0005905,GO:0030136,GO:0005794,GO:0005739,GO:0005886,GO:0005545,GO:0030276,GO:0032050,GO:0005546,GO:0000149,GO:0048268,GO:0072583,GO:0006900	clathrin-coated pit|clathrin-coated vesicle|Golgi apparatus|mitochondrion|plasma membrane|1-phosphatidylinositol binding|clathrin binding|clathrin heavy chain binding|phosphatidylinositol-4,5-bisphosphate binding|SNARE binding|clathrin coat assembly|clathrin-dependent endocytosis|vesicle budding from membrane
CSS0001192	-0.235933	0.724246	Down
CSS0001193	0.881321	0.0952081	Up	CAP1	Cyclase-associated protein 1	GO:0005737,GO:0003779,GO:0008179,GO:0030036,GO:0019933,GO:0045761,GO:0009826	cytoplasm|actin binding|adenylate cyclase binding|actin cytoskeleton organization|cAMP-mediated signaling|regulation of adenylate cyclase activity|unidimensional cell growth
CSS0001194	0.17569	0.753919	Up	GSVIVT00023967001	Peroxidase 4	GO:0005576,GO:0020037,GO:0140825,GO:0046872,GO:0042744,GO:0006979	extracellular region|heme binding|lactoperoxidase activity|metal ion binding|hydrogen peroxide catabolic process|response to oxidative stress	ko00940	Phenylpropanoid biosynthesis
CSS0001195	-0.235852	0.292754	Down	PMI1	Protein PLASTID MOVEMENT IMPAIRED 1	GO:0005829,GO:0005634,GO:0005886,GO:1902265,GO:0009738,GO:0030048,GO:0009903,GO:0009902,GO:0031022,GO:0009787,GO:0010029,GO:0009637,GO:0006970	cytosol|nucleus|plasma membrane|abscisic acid homeostasis|abscisic acid-activated signaling pathway|actin filament-based movement|chloroplast avoidance movement|chloroplast relocation|nuclear migration along microfilament|regulation of abscisic acid-activated signaling pathway|regulation of seed germination|response to blue light|response to osmotic stress
CSS0001196	-0.367827	0.196119	Down
CSS0001197	0.104801	0.614053	Up
CSS0001200	0.0188062	0.953011	Up	CLPR4	ATP-dependent Clp protease proteolytic subunit-related protein 4, chloroplastic	GO:0009507,GO:0009941,GO:0009570,GO:0005829,GO:0009368,GO:0009536,GO:0009532,GO:0004176,GO:0051117,GO:0004252,GO:0006515,GO:0010468,GO:0000302	chloroplast|chloroplast envelope|chloroplast stroma|cytosol|endopeptidase Clp complex|plastid|plastid stroma|ATP-dependent peptidase activity|ATPase binding|serine-type endopeptidase activity|protein quality control for misfolded or incompletely synthesized proteins|regulation of gene expression|response to reactive oxygen species
CSS0001201	-0.7933	0.000481021	Down	TOL6	TOM1-like protein 6	GO:0005737,GO:0005769,GO:0031901,GO:0005771,GO:0035091,GO:0043130,GO:0043328	cytoplasm|early endosome|early endosome membrane|multivesicular body|phosphatidylinositol binding|ubiquitin binding|protein transport to vacuole involved in ubiquitin-dependent protein catabolic process via the multivesicular body sorting pathway
CSS0001206	0.639954	0.35887	Up
CSS0001207	-0.222891	0.6812	Down
CSS0001208	0.565405	0.552054	Up	PYRD	Riboflavin biosynthesis protein PYRD, chloroplastic	GO:0009507,GO:0009570,GO:0008835,GO:0008270,GO:0009231	chloroplast|chloroplast stroma|diaminohydroxyphosphoribosylaminopyrimidine deaminase activity|zinc ion binding|riboflavin biosynthetic process	ko00740	Riboflavin metabolism
CSS0001210	0.424472	0.364678	Up	RH42	DEAD-box ATP-dependent RNA helicase 42	GO:0005634,GO:0005524,GO:0016887,GO:0003723,GO:0003724,GO:0000398	nucleus|ATP binding|ATP hydrolysis activity|RNA binding|RNA helicase activity|mRNA splicing, via spliceosome	ko03040	Spliceosome
CSS0001211	0.0288411	0.935949	Up	At3g03360	F-box/LRR-repeat protein At3g03360	GO:0005737	cytoplasm
CSS0001213	-0.806095	0.0286609	Down	DRIP2	E3 ubiquitin protein ligase DRIP2	GO:0046872,GO:0004842,GO:0051865,GO:0016567,GO:0009414	metal ion binding|ubiquitin-protein transferase activity|protein autoubiquitination|protein ubiquitination|response to water deprivation
CSS0001214	-0.180358	0.644971	Down	MET1	Protein MET1, chloroplastic	GO:0009507,GO:0009941,GO:0031969,GO:0009570,GO:0009534,GO:0009535,GO:0009575,GO:0035448,GO:0005634,GO:0009523,GO:0009579,GO:0015979,GO:0010207,GO:0010206,GO:0009644,GO:0009416,GO:0009611	chloroplast|chloroplast envelope|chloroplast membrane|chloroplast stroma|chloroplast thylakoid|chloroplast thylakoid membrane|chromoplast stroma|extrinsic component of thylakoid membrane|nucleus|photosystem II|thylakoid|photosynthesis|photosystem II assembly|photosystem II repair|response to high light intensity|response to light stimulus|response to wounding
CSS0001215	3.48035	1.32523e-06	Up	KIN12E	Kinesin-like protein KIN-12E	GO:0005871,GO:0005874,GO:0005641,GO:0009524,GO:0005819,GO:0005524,GO:0016887,GO:0008017,GO:0003777,GO:0007018,GO:1901673,GO:0051225	kinesin complex|microtubule|nuclear envelope lumen|phragmoplast|spindle|ATP binding|ATP hydrolysis activity|microtubule binding|microtubule motor activity|microtubule-based movement|regulation of mitotic spindle assembly|spindle assembly	ko04814	Motor proteins
CSS0001216	0.44891	0.0288343	Up	BZIP29	bZIP transcription factor 29	GO:0005737,GO:0005829,GO:0005634,GO:0003700,GO:0042803,GO:0043565,GO:0000976,GO:0006355,GO:0090567	cytoplasm|cytosol|nucleus|DNA-binding transcription factor activity|protein homodimerization activity|sequence-specific DNA binding|transcription cis-regulatory region binding|regulation of DNA-templated transcription|reproductive shoot system development
CSS0001218	0.656172	0.57841	Up	At5g64320	Pentatricopeptide repeat-containing protein At5g64320, mitochondrial	GO:0005739,GO:0032543	mitochondrion|mitochondrial translation
CSS0001221	0.30727	0.567133	Up	FRO2	Ferric reduction oxidase 2	GO:0005886,GO:0140618,GO:0000293,GO:0046872,GO:0055072,GO:0009617,GO:0033214	plasma membrane|ferric-chelate reductase (NADH) activity|ferric-chelate reductase activity|metal ion binding|iron ion homeostasis|response to bacterium|siderophore-dependent iron import into cell
CSS0001222	-1.66199	0.0359256	Down
CSS0001223	-0.707344	0.107621	Down	ABF2	ABSCISIC ACID-INSENSITIVE 5-like protein 5	GO:0005634,GO:0003677,GO:0003700,GO:0009738,GO:0045893	nucleus|DNA binding|DNA-binding transcription factor activity|abscisic acid-activated signaling pathway|positive regulation of DNA-templated transcription	ko04075	Plant hormone signal transduction
CSS0001224	2.60249	0.408248	Up	HISN1B	ATP phosphoribosyltransferase 2, chloroplastic	GO:0009507,GO:0009570,GO:0003879,GO:0000287,GO:0000105	chloroplast|chloroplast stroma|ATP phosphoribosyltransferase activity|magnesium ion binding|histidine biosynthetic process	ko00340	Histidine metabolism
CSS0001226	-1.52043	0.0092279	Down	SIB1	Sigma factor binding protein 1, chloroplastic	GO:0009507,GO:0005634,GO:0071482,GO:0042742,GO:0051091	chloroplast|nucleus|cellular response to light stimulus|defense response to bacterium|positive regulation of DNA-binding transcription factor activity
CSS0001227	2.76974	0.0258961	Up	SAUR76	Auxin-responsive protein SAUR76	GO:0005737,GO:0019897,GO:0005634,GO:0009873,GO:0030307,GO:0009733	cytoplasm|extrinsic component of plasma membrane|nucleus|ethylene-activated signaling pathway|positive regulation of cell growth|response to auxin
CSS0001228	0.80286	0.18557	Up	At3g06410	Zinc finger CCCH domain-containing protein 34	GO:0005634,GO:0003677,GO:0046872,GO:0003729	nucleus|DNA binding|metal ion binding|mRNA binding
CSS0001230	0.621896	0.617115	Up	DCUP	Uroporphyrinogen decarboxylase, chloroplastic	GO:0009507,GO:0004853,GO:0015995,GO:0006782	chloroplast|uroporphyrinogen decarboxylase activity|chlorophyll biosynthetic process|protoporphyrinogen IX biosynthetic process	ko00860	Porphyrin metabolism
CSS0001232	0.286256	0.588908	Up		Ubiquitin-conjugating enzyme E2-17 kDa	GO:0005634,GO:0005524,GO:0061631,GO:0000209,GO:0006511	nucleus|ATP binding|ubiquitin conjugating enzyme activity|protein polyubiquitination|ubiquitin-dependent protein catabolic process	ko04141,ko04120,ko03083	Protein processing in endoplasmic reticulum|Ubiquitin mediated proteolysis|Polycomb repressive complex
CSS0001233	-0.639797	0.0986294	Down	TRS130	Trafficking protein particle complex II-specific subunit 130 homolog	GO:0005829,GO:0005769,GO:0005802,GO:1990071,GO:0000919,GO:0000911,GO:0034498,GO:0006891	cytosol|early endosome|trans-Golgi network|TRAPPII protein complex|cell plate assembly|cytokinesis by cell plate formation|early endosome to Golgi transport|intra-Golgi vesicle-mediated transport
CSS0001234	-0.209611	0.599686	Down	DTX42	Protein DETOXIFICATION 42	GO:0005886,GO:0035618,GO:0015297,GO:0015137,GO:0042910,GO:0015746,GO:0010044	plasma membrane|root hair|antiporter activity|citrate transmembrane transporter activity|xenobiotic transmembrane transporter activity|citrate transport|response to aluminum ion
CSS0001235	0.91502	0.684236	Up
CSS0001236	-0.400677	0.50016	Down	PRA1H	PRA1 family protein H	GO:0005783,GO:0005789,GO:0005794,GO:0016192	endoplasmic reticulum|endoplasmic reticulum membrane|Golgi apparatus|vesicle-mediated transport
CSS0001237	0.286424	0.851195	Up	RABH1B	Ras-related protein RABH1b	GO:0005829,GO:0012505,GO:0005768,GO:0005794,GO:0000139,GO:0016020,GO:0000325,GO:0005886,GO:0009506,GO:0005802,GO:0005525,GO:0003924,GO:0006887,GO:0006891,GO:0006886,GO:0052324,GO:0001558,GO:0042147,GO:0006890	cytosol|endomembrane system|endosome|Golgi apparatus|Golgi membrane|membrane|plant-type vacuole|plasma membrane|plasmodesma|trans-Golgi network|GTP binding|GTPase activity|exocytosis|intra-Golgi vesicle-mediated transport|intracellular protein transport|plant-type cell wall cellulose biosynthetic process|regulation of cell growth|retrograde transport, endosome to Golgi|retrograde vesicle-mediated…
CSS0001239	0.771572	0.528739	Up
CSS0001240	1.01279	0.114368	Up	FIP1	GEM-like protein 1	GO:0005634	nucleus
CSS0001241	0.283996	0.217567	Up	TUFA	Elongation factor Tu, mitochondrial	GO:0005829,GO:0005739,GO:0009505,GO:0005524,GO:0050897,GO:0005525,GO:0003924,GO:0003746,GO:0008270,GO:0070125,GO:0046686,GO:0006414	cytosol|mitochondrion|plant-type cell wall|ATP binding|cobalt ion binding|GTP binding|GTPase activity|translation elongation factor activity|zinc ion binding|mitochondrial translational elongation|response to cadmium ion|translational elongation	ko04626	Plant-pathogen interaction
CSS0001242	-0.193461	0.571356	Down	At3g49055	Uncharacterized protein At3g49055
CSS0001243	-0.0821298	0.8632	Down					ko00052,ko00600,ko00511	Galactose metabolism|Sphingolipid metabolism|Other glycan degradation
CSS0001244	0.038726	0.971369	Up	At1g50180	Putative disease resistance protein At1g50180	GO:0009506,GO:0043531,GO:0005524,GO:0006952,GO:0051707	plasmodesma|ADP binding|ATP binding|defense response|response to other organism
CSS0001245	-0.0815923	0.950763	Down					ko00240	Pyrimidine metabolism
CSS0001246	0.794397	0.0145133	Up	BZIP44	bZIP transcription factor 44	GO:0005634,GO:0003700,GO:0046982,GO:0043565,GO:0000976,GO:0045893,GO:0009845	nucleus|DNA-binding transcription factor activity|protein heterodimerization activity|sequence-specific DNA binding|transcription cis-regulatory region binding|positive regulation of DNA-templated transcription|seed germination
CSS0001248	1.63763	0.462139	Up	CYP96A15	Alkane hydroxylase MAH1	GO:0005783,GO:0005789,GO:0020037,GO:0005506,GO:0080133,GO:0010025	endoplasmic reticulum|endoplasmic reticulum membrane|heme binding|iron ion binding|midchain alkane hydroxylase activity|wax biosynthetic process
CSS0001249	-0.000392771	0.999263	Down
CSS0001250	-0.942585	0.567615	Down
CSS0001253	-3.25032	0.000429765	Down	NPF7.3	Protein NRT1/ PTR FAMILY 7.3	GO:0016020,GO:0005886,GO:0015112,GO:0015386,GO:0015293,GO:0022857,GO:0010150,GO:0015706,GO:0055075,GO:1902600,GO:0010167,GO:0055085	membrane|plasma membrane|nitrate transmembrane transporter activity|potassium:proton antiporter activity|symporter activity|transmembrane transporter activity|leaf senescence|nitrate transmembrane transport|potassium ion homeostasis|proton transmembrane transport|response to nitrate|transmembrane transport
CSS0001255	2.37062	0.00926383	Up	LTP8	Non-specific lipid-transfer protein 8	GO:0008289,GO:0006869	lipid binding|lipid transport
CSS0001256	0.378394	0.176726	Up	UBICEP52-7	Ubiquitin-60S ribosomal protein L40	GO:0005737,GO:0005634,GO:1990904,GO:0005840,GO:0003729,GO:0003735,GO:0006412	cytoplasm|nucleus|ribonucleoprotein complex|ribosome|mRNA binding|structural constituent of ribosome|translation	ko03010,ko04120	Ribosome|Ubiquitin mediated proteolysis
CSS0001257	-0.450905	0.481025	Down		Plastidic ATP/ADP-transporter	GO:0031969,GO:0005524,GO:0005471	chloroplast membrane|ATP binding|ATP:ADP antiporter activity
CSS0001258	-1.06461	0.146522	Down	MPT3	Mitochondrial phosphate carrier protein 3, mitochondrial	GO:0005743,GO:0005739,GO:0009505,GO:0000325,GO:0005315,GO:0003729,GO:1990547,GO:0035435,GO:0009651	mitochondrial inner membrane|mitochondrion|plant-type cell wall|plant-type vacuole|inorganic phosphate transmembrane transporter activity|mRNA binding|mitochondrial phosphate ion transmembrane transport|phosphate ion transmembrane transport|response to salt stress
CSS0001261	3.73365	1.55114e-07	Up	WAV3	E3 ubiquitin-protein ligase WAV3	GO:0046872,GO:0061630,GO:0009630,GO:0010274,GO:0016567,GO:0048364	metal ion binding|ubiquitin protein ligase activity|gravitropism|hydrotropism|protein ubiquitination|root development
CSS0001262	0.58216	0.178303	Up	At5g27430	Signal peptidase complex subunit 3B	GO:0005787,GO:0045047,GO:0006465	signal peptidase complex|protein targeting to ER|signal peptide processing	ko03060	Protein export
CSS0001264	-0.438709	0.217025	Down	SPA1	Protein SUPPRESSOR OF PHYA-105 1	GO:0080008,GO:0016604,GO:0016607,GO:0005634,GO:0016605,GO:0005524,GO:0042802,GO:0004672,GO:0009658,GO:0010100,GO:0009640,GO:0006468,GO:0010017,GO:0009585,GO:2000028,GO:0009637,GO:0010218,GO:0010114,GO:0048575	Cul4-RING E3 ubiquitin ligase complex|nuclear body|nuclear speck|nucleus|PML body|ATP binding|identical protein binding|protein kinase activity|chloroplast organization|negative regulation of photomorphogenesis|photomorphogenesis|protein phosphorylation|red or far-red light signaling pathway|red, far-red light phototransduction|regulation of photoperiodism, flowering|response to blue light|respon…	ko04712	Circadian rhythm - plant
CSS0001265	0.208997	0.6488	Up	PCMP-E87	Putative pentatricopeptide repeat-containing protein At3g01580	GO:0003723,GO:0009451	RNA binding|RNA modification
CSS0001267	0.472683	0.445427	Up
CSS0001272	0.619017	0.204865	Up	TFT7	14-3-3 protein 7	GO:0005737,GO:0007165	cytoplasm|signal transduction
CSS0001274	0.10849	0.619047	Up	FRL1	FRIGIDA-like protein 1	GO:0030154,GO:0009908	cell differentiation|flower development
CSS0001276	2.10734	0.427564	Up
CSS0001277	-0.00253154	0.991674	Down	RIN2	E3 ubiquitin protein ligase RIN2	GO:0005886,GO:0046872,GO:0043130,GO:0061630,GO:0004842,GO:0009626,GO:0034052,GO:0006511	plasma membrane|metal ion binding|ubiquitin binding|ubiquitin protein ligase activity|ubiquitin-protein transferase activity|plant-type hypersensitive response|positive regulation of plant-type hypersensitive response|ubiquitin-dependent protein catabolic process	ko04141	Protein processing in endoplasmic reticulum
CSS0001279	0.0900163	0.919567	Up	At1g20180	UPF0496 protein At1g20180	GO:0016020	membrane
CSS0001280	3.14174	0.000376192	Up
CSS0001281	-0.0349085	0.919605	Down	At3g15810	Protein LURP-one-related 12	GO:0005829	cytosol
CSS0001284	-0.147658	0.944177	Down	HCR9-0	Receptor-like protein Cf-9 homolog	GO:0005886	plasma membrane
CSS0001286	-0.330543	0.638397	Down
CSS0001287	0.828162	0.144249	Up	RBOHA	Respiratory burst oxidase homolog protein A	GO:0005886,GO:0005509,GO:0000293,GO:0016174,GO:0004601	plasma membrane|calcium ion binding|ferric-chelate reductase activity|NAD(P)H oxidase H2O2-forming activity|peroxidase activity	ko04016,ko04626	MAPK signaling pathway - plant|Plant-pathogen interaction
CSS0001288	-0.858856	0.0546864	Down
CSS0001289	-2.02874	0.40434	Down	KRP1	Calcium-binding protein KRP1	GO:0005509,GO:0071456,GO:0009733	calcium ion binding|cellular response to hypoxia|response to auxin
CSS0001290	3.68253	0.166237	Up	RE2	Retrovirus-related Pol polyprotein from transposon RE2	GO:0004190,GO:0004519,GO:0046872,GO:0003676,GO:0003964,GO:0015074,GO:0006310,GO:0006508	aspartic-type endopeptidase activity|endonuclease activity|metal ion binding|nucleic acid binding|RNA-directed DNA polymerase activity|DNA integration|DNA recombination|proteolysis
CSS0001291	-0.429303	0.122097	Down	PI4KG7	Phosphatidylinositol 4-kinase gamma 7	GO:0004430,GO:0005524,GO:0046854,GO:0046777	1-phosphatidylinositol 4-kinase activity|ATP binding|phosphatidylinositol phosphate biosynthetic process|protein autophosphorylation
CSS0001294	0.855649	0.0389454	Up
CSS0001295	1.08677	0.134416	Up
CSS0001296	0.0788285	0.933733	Up	PCMP-E5	Putative pentatricopeptide repeat-containing protein At1g77010, mitochondrial	GO:0043231,GO:0005739,GO:0003723,GO:0009451	intracellular membrane-bounded organelle|mitochondrion|RNA binding|RNA modification
CSS0001297	-2.7263	0.00342913	Down	HSR4	Protein HYPER-SENSITIVITY-RELATED 4	GO:0005740,GO:0005741,GO:0005739,GO:0005524,GO:0016887,GO:0042802,GO:0008219,GO:0009626,GO:0009617,GO:0002237,GO:0009411,GO:0009863	mitochondrial envelope|mitochondrial outer membrane|mitochondrion|ATP binding|ATP hydrolysis activity|identical protein binding|cell death|plant-type hypersensitive response|response to bacterium|response to molecule of bacterial origin|response to UV|salicylic acid mediated signaling pathway
CSS0001298	-0.445084	0.341799	Down	21D7	Probable 26S proteasome non-ATPase regulatory subunit 3	GO:0005634,GO:0008541,GO:0030234,GO:0042176,GO:0006511	nucleus|proteasome regulatory particle, lid subcomplex|enzyme regulator activity|regulation of protein catabolic process|ubiquitin-dependent protein catabolic process	ko03050	Proteasome
CSS0001300	-1.12848	3.02472e-09	Down	RFS6	Probable galactinol--sucrose galactosyltransferase 6	GO:0047274,GO:0005975	galactinol-sucrose galactosyltransferase activity|carbohydrate metabolic process	ko00052	Galactose metabolism
CSS0001301	0.0821319	0.787302	Up					ko03013	Nucleocytoplasmic transport
CSS0001302	0.380717	0.58	Up	TIM14-1	Mitochondrial import inner membrane translocase subunit TIM14-1	GO:0001405,GO:0001671,GO:0030150	PAM complex, Tim23 associated import motor|ATPase activator activity|protein import into mitochondrial matrix
CSS0001303	-0.68293	0.0855839	Down	SHM7	Serine hydroxymethyltransferase 7	GO:0005737,GO:0005634,GO:0004372,GO:0030170,GO:0070905,GO:0008270,GO:0046655,GO:0019264,GO:0006565,GO:0006730,GO:0044030,GO:0046686,GO:0046500,GO:0055063,GO:0035999,GO:0046653	cytoplasm|nucleus|glycine hydroxymethyltransferase activity|pyridoxal phosphate binding|serine binding|zinc ion binding|folic acid metabolic process|glycine biosynthetic process from serine|L-serine catabolic process|one-carbon metabolic process|regulation of DNA methylation|response to cadmium ion|S-adenosylmethionine metabolic process|sulfate ion homeostasis|tetrahydrofolate interconversion|tet…	ko00630,ko00260,ko00460,ko00670	Glyoxylate and dicarboxylate metabolism|Glycine, serine and threonine metabolism|Cyanoamino acid metabolism|One carbon pool by folate
CSS0001305	6.02573	0.0320306	Up	PIP2-7	Aquaporin PIP2-7	GO:0005886,GO:0009506,GO:0005773,GO:0003729,GO:0015250	plasma membrane|plasmodesma|vacuole|mRNA binding|water channel activity
CSS0001307	-0.449511	0.363885	Down
CSS0001308	4.66908	5.10721e-14	Up	AAO	L-ascorbate oxidase	GO:0005576,GO:0005507,GO:0008447,GO:0016491	extracellular region|copper ion binding|L-ascorbate oxidase activity|oxidoreductase activity	ko00053	Ascorbate and aldarate metabolism
CSS0001309	-2.20431	0.442146	Down
CSS0001318	0.733739	0.149506	Up
CSS0001319	7.45092	3.44337e-13	Up	RKL1	Probable inactive receptor kinase At1g48480	GO:0005634,GO:0000325,GO:0005886,GO:0009506,GO:0005524,GO:0042802,GO:0004672,GO:0006468	nucleus|plant-type vacuole|plasma membrane|plasmodesma|ATP binding|identical protein binding|protein kinase activity|protein phosphorylation
CSS0001320	-0.450946	0.273927	Down
CSS0001321	6.58636	0.00194927	Up	ERF034	Ethylene-responsive transcription factor ERF034	GO:0005634,GO:0003700,GO:0000976,GO:0009873	nucleus|DNA-binding transcription factor activity|transcription cis-regulatory region binding|ethylene-activated signaling pathway
CSS0001322	-0.142192	0.581118	Down	XBAT35	Putative E3 ubiquitin-protein ligase XBAT35	GO:0005737,GO:0005634,GO:0046872,GO:0004842	cytoplasm|nucleus|metal ion binding|ubiquitin-protein transferase activity
CSS0001323	-0.0945516	0.77422	Down	At1g11710	Pentatricopeptide repeat-containing protein At1g11710, mitochondrial	GO:0005739	mitochondrion
CSS0001325	-0.69101	0.0358784	Down
CSS0001326	1.69131	5.81484e-09	Up	SIRP1	E3 ubiquitin-protein ligase SIRP1	GO:0005737,GO:0046872,GO:0061630,GO:0006511	cytoplasm|metal ion binding|ubiquitin protein ligase activity|ubiquitin-dependent protein catabolic process
CSS0001327	-1.20006	0.0777986	Down	MYB3R4	Transcription factor MYB3R-4	GO:0005634,GO:0009524,GO:0005819,GO:0001228,GO:0003700,GO:0000981,GO:0000978,GO:0043565,GO:0000976,GO:0050832,GO:1901181,GO:0045893,GO:0032465,GO:0032875,GO:0006355,GO:0009620,GO:0009751	nucleus|phragmoplast|spindle|DNA-binding transcription activator activity, RNA polymerase II-specific|DNA-binding transcription factor activity|DNA-binding transcription factor activity, RNA polymerase II-specific|RNA polymerase II cis-regulatory region sequence-specific DNA binding|sequence-specific DNA binding|transcription cis-regulatory region binding|defense response to fungus|negative regul…
CSS0001328	-0.390451	0.245826	Down
CSS0001330	-0.902199	0.177442	Down
CSS0001331	-1.80812	0.525284	Down
CSS0001333	-3.64128	0.00235185	Down	CRK10	Cysteine-rich receptor-like protein kinase 10	GO:0005829,GO:0005886,GO:0005524,GO:0106310,GO:0004674,GO:0042742,GO:0006468	cytosol|plasma membrane|ATP binding|protein serine kinase activity|protein serine/threonine kinase activity|defense response to bacterium|protein phosphorylation
CSS0001334	-0.309798	0.50941	Down
CSS0001335	0.707318	0.246256	Up	NFD3	Probable ribosomal protein S11, mitochondrial	GO:0005763,GO:0048027,GO:0070181,GO:0003735,GO:0000741,GO:0000462,GO:0010197,GO:0000028,GO:0006412	mitochondrial small ribosomal subunit|mRNA 5'-UTR binding|small ribosomal subunit rRNA binding|structural constituent of ribosome|karyogamy|maturation of SSU-rRNA from tricistronic rRNA transcript (SSU-rRNA, 5.8S rRNA, LSU-rRNA)|polar nucleus fusion|ribosomal small subunit assembly|translation	ko03010	Ribosome
CSS0001336	-0.311178	0.657827	Down	Os12g0560500	RNA pseudouridine synthase 1	GO:0009982,GO:0003723,GO:0001522	pseudouridine synthase activity|RNA binding|pseudouridine synthesis
CSS0001337	2.08643	0.172408	Up	LIMYB	L10-interacting MYB domain-containing protein	GO:0005634	nucleus
CSS0001339	-0.540051	0.742423	Down
CSS0001340	1.78407	0.0303384	Up	CPC	Transcription factor CPC	GO:0005634,GO:0003700,GO:0000976,GO:0030154,GO:0009913,GO:0010063,GO:0010376	nucleus|DNA-binding transcription factor activity|transcription cis-regulatory region binding|cell differentiation|epidermal cell differentiation|positive regulation of trichoblast fate specification|stomatal complex formation
CSS0001341	0.429582	0.0344936	Up	At4g33760	Aspartate--tRNA ligase, chloroplastic/mitochondrial	GO:0009507,GO:0005829,GO:0005739,GO:0004815,GO:0005524,GO:0003677,GO:0046872,GO:0006422	chloroplast|cytosol|mitochondrion|aspartate-tRNA ligase activity|ATP binding|DNA binding|metal ion binding|aspartyl-tRNA aminoacylation	ko00970	Aminoacyl-tRNA biosynthesis
CSS0001342	-0.998321	0.0505831	Down					ko00630,ko00910,ko00460	Glyoxylate and dicarboxylate metabolism|Nitrogen metabolism|Cyanoamino acid metabolism
CSS0001344	1.53313	0.259955	Up	MES10	Methylesterase 10	GO:0005829,GO:0016788,GO:0080030,GO:0080032,GO:0080031,GO:0071456,GO:0009694,GO:0031408,GO:0009696	cytosol|hydrolase activity, acting on ester bonds|methyl indole-3-acetate esterase activity|methyl jasmonate esterase activity|methyl salicylate esterase activity|cellular response to hypoxia|jasmonic acid metabolic process|oxylipin biosynthetic process|salicylic acid metabolic process
CSS0001347	-0.606975	0.0296974	Down	CAMTA5	Calmodulin-binding transcription activator 5	GO:0005634,GO:0005516,GO:0003700,GO:0003690,GO:0043565,GO:0003712,GO:0070417,GO:0006355,GO:0006357,GO:0009409	nucleus|calmodulin binding|DNA-binding transcription factor activity|double-stranded DNA binding|sequence-specific DNA binding|transcription coregulator activity|cellular response to cold|regulation of DNA-templated transcription|regulation of transcription by RNA polymerase II|response to cold
CSS0001348	-1.51669	0.0573087	Down	pKIWI504	Metallothionein-like protein type 2	GO:0046872	metal ion binding
CSS0001350	0.490116	0.2881	Up
CSS0001351	-0.590924	0.268386	Down	C50	Chaperone protein dnaJ 50	GO:0005783,GO:0005789,GO:0005634,GO:0006457	endoplasmic reticulum|endoplasmic reticulum membrane|nucleus|protein folding
CSS0001353	-1.74309	0.028069	Down	BOR4	Boron transporter 4	GO:0005886,GO:0080139,GO:0005452,GO:0022857,GO:0046713,GO:0080029,GO:0050801,GO:0055085	plasma membrane|borate efflux transmembrane transporter activity|solute:inorganic anion antiporter activity|transmembrane transporter activity|borate transport|cellular response to boron-containing substance levels|ion homeostasis|transmembrane transport
CSS0001354	-0.295519	0.343735	Down
CSS0001358	2.30029	0.0060322	Up	EO	2-methylene-furan-3-one reductase	GO:0009507,GO:0102978,GO:0008270	chloroplast|furaneol oxidoreductase activity|zinc ion binding
CSS0001360	5.85641	5.80836e-05	Up	COPT1	Copper transporter 1	GO:0016020,GO:0005886,GO:0005375,GO:0006878,GO:0006825,GO:0048235,GO:0048364	membrane|plasma membrane|copper ion transmembrane transporter activity|cellular copper ion homeostasis|copper ion transport|pollen sperm cell differentiation|root development
CSS0001361	4.69696	0.03791	Up
CSS0001363	0.0974378	0.844595	Up	DYW9	Pentatricopeptide repeat-containing protein At4g30700	GO:0009507,GO:0043231,GO:0005739,GO:0003723,GO:0008270,GO:0016554,GO:0080156,GO:0000963,GO:0009451	chloroplast|intracellular membrane-bounded organelle|mitochondrion|RNA binding|zinc ion binding|cytidine to uridine editing|mitochondrial mRNA modification|mitochondrial RNA processing|RNA modification
CSS0001364	6.85368	1.36793e-05	Up	CSLD5	Cellulose synthase-like protein D5	GO:0005794,GO:0000139,GO:0005886,GO:0016760,GO:0046527,GO:0051753,GO:0000919,GO:0042546,GO:0071555,GO:0030244,GO:0009833,GO:0006970,GO:0009651,GO:0009414,GO:0048367	Golgi apparatus|Golgi membrane|plasma membrane|cellulose synthase (UDP-forming) activity|glucosyltransferase activity|mannan synthase activity|cell plate assembly|cell wall biogenesis|cell wall organization|cellulose biosynthetic process|plant-type primary cell wall biogenesis|response to osmotic stress|response to salt stress|response to water deprivation|shoot system development	ko00520	Amino sugar and nucleotide sugar metabolism
CSS0001368	-0.416698	0.366673	Down	At4g37920	Uncharacterized protein At4g37920	GO:0009941,GO:0009535	chloroplast envelope|chloroplast thylakoid membrane
CSS0001371	0.53672	0.296193	Up	At5g10020	Probable inactive receptor kinase At5g10020	GO:0005886,GO:0005524,GO:0004672,GO:0006468	plasma membrane|ATP binding|protein kinase activity|protein phosphorylation
CSS0001372	0.0654879	0.787288	Up	RPL13B	60S ribosomal protein L13-1	GO:0005829,GO:0022625,GO:0022626,GO:0005730,GO:0009505,GO:0000325,GO:0009506,GO:0042788,GO:0003729,GO:0003723,GO:0003735,GO:0006412	cytosol|cytosolic large ribosomal subunit|cytosolic ribosome|nucleolus|plant-type cell wall|plant-type vacuole|plasmodesma|polysomal ribosome|mRNA binding|RNA binding|structural constituent of ribosome|translation	ko03010	Ribosome
CSS0001373	0.372	0.284168	Up	KIN7E	Kinesin-like protein KIN-7E	GO:0005874,GO:0005524,GO:0008017,GO:0003777,GO:0007018	microtubule|ATP binding|microtubule binding|microtubule motor activity|microtubule-based movement	ko04814	Motor proteins
CSS0001376	-0.252605	0.417576	Down	RPS2	Ribosomal protein S2, mitochondrial	GO:0005763,GO:0003735,GO:0006412	mitochondrial small ribosomal subunit|structural constituent of ribosome|translation	ko00040,ko00052,ko00500,ko00520	Pentose and glucuronate interconversions|Galactose metabolism|Starch and sucrose metabolism|Amino sugar and nucleotide sugar metabolism
CSS0001377	-0.300487	0.172915	Down	MRS2-4	Magnesium transporter MRS2-4	GO:0016020,GO:0015095,GO:0015693	membrane|magnesium ion transmembrane transporter activity|magnesium ion transport
CSS0001378	-0.791717	0.451793	Down
CSS0001379	-0.402345	0.185618	Down
CSS0001380	-0.0397011	0.932079	Down	At2g40290	Eukaryotic translation initiation factor 2 subunit alpha homolog	GO:0033290,GO:0005850,GO:0005851,GO:0005794,GO:0043614,GO:0005634,GO:0003729,GO:0043022,GO:0003743	eukaryotic 48S preinitiation complex|eukaryotic translation initiation factor 2 complex|eukaryotic translation initiation factor 2B complex|Golgi apparatus|multi-eIF complex|nucleus|mRNA binding|ribosome binding|translation initiation factor activity	ko04141	Protein processing in endoplasmic reticulum
CSS0001381	-0.885103	0.592523	Down
CSS0001382	0.871761	0.0046774	Up	BTR1	Protein BTR1	GO:0005737,GO:0005829,GO:0005886,GO:0003729,GO:0003727,GO:0046719,GO:0010468,GO:0008380	cytoplasm|cytosol|plasma membrane|mRNA binding|single-stranded RNA binding|regulation by virus of viral protein levels in host cell|regulation of gene expression|RNA splicing
CSS0001384	-0.303888	0.212176	Down					ko03030,ko03410,ko03420,ko03430,ko03440	DNA replication|Base excision repair|Nucleotide excision repair|Mismatch repair|Homologous recombination
CSS0001386	-0.27673	0.398755	Down	ANT1	ADP,ATP carrier protein, mitochondrial (Fragment)	GO:0005743,GO:0005471,GO:0140021,GO:1990544	mitochondrial inner membrane|ATP:ADP antiporter activity|mitochondrial ADP transmembrane transport|mitochondrial ATP transmembrane transport
CSS0001387	5.72675	2.58322e-08	Up	PER72	Peroxidase 72	GO:0005576,GO:0009505,GO:0020037,GO:0140825,GO:0046872,GO:0042744,GO:0009809,GO:0006979	extracellular region|plant-type cell wall|heme binding|lactoperoxidase activity|metal ion binding|hydrogen peroxide catabolic process|lignin biosynthetic process|response to oxidative stress	ko00940	Phenylpropanoid biosynthesis
CSS0001388	-1.82754	0.407786	Down	SMP1	SEED MATURATION PROTEIN 1	GO:0044183,GO:0010231,GO:0009408,GO:0010162	protein folding chaperone|maintenance of seed dormancy|response to heat|seed dormancy process
CSS0001389	0.038266	0.819872	Up	HD16	Casein kinase 1-like protein HD16	GO:0005737,GO:0005634,GO:0005524,GO:0106310,GO:0004674,GO:0006897,GO:0009908,GO:0009740,GO:0010476,GO:0018105,GO:0048586,GO:0007165	cytoplasm|nucleus|ATP binding|protein serine kinase activity|protein serine/threonine kinase activity|endocytosis|flower development|gibberellic acid mediated signaling pathway|gibberellin mediated signaling pathway|peptidyl-serine phosphorylation|regulation of long-day photoperiodism, flowering|signal transduction
CSS0001390	0.0678546	0.940863	Up	At1g63430	Probable LRR receptor-like serine/threonine-protein kinase At1g63430	GO:0005886,GO:0005524,GO:0106310,GO:0004674,GO:0006468	plasma membrane|ATP binding|protein serine kinase activity|protein serine/threonine kinase activity|protein phosphorylation
CSS0001392	-1.18962	0.00145497	Down
CSS0001393	2.36439	4.44148e-08	Up	TOM2AH3	Tetraspanin-19	GO:0005774	vacuolar membrane
CSS0001396	-0.375199	0.0436429	Down	CUV	Pre-mRNA-splicing factor ATP-dependent RNA helicase DEAH7	GO:0005634,GO:0005681,GO:0005524,GO:0016887,GO:0003723,GO:0003724,GO:0050832,GO:0009793,GO:0010467,GO:0045087,GO:0000398,GO:0031334,GO:0033120,GO:0031053,GO:0008380,GO:0035194,GO:0048364,GO:0048767,GO:0010051	nucleus|spliceosomal complex|ATP binding|ATP hydrolysis activity|RNA binding|RNA helicase activity|defense response to fungus|embryo development ending in seed dormancy|gene expression|innate immune response|mRNA splicing, via spliceosome|positive regulation of protein-containing complex assembly|positive regulation of RNA splicing|primary miRNA processing|RNA splicing|RNA-mediated post-transcrip…	ko03040	Spliceosome
CSS0001397	0.616337	0.0873877	Up	At1g09160	Probable protein phosphatase 2C 5	GO:0005886,GO:0046872,GO:0017018,GO:0004722,GO:0035970	plasma membrane|metal ion binding|myosin phosphatase activity|protein serine/threonine phosphatase activity|peptidyl-threonine dephosphorylation
CSS0001400	0.311364	0.818619	Up
CSS0001401	1.28626	0.108791	Up	At2g04865	Protein MAIN-LIKE 2	GO:0005634,GO:0008483,GO:0010073	nucleus|transaminase activity|meristem maintenance
CSS0001402	-0.133126	0.773478	Down	RE1	Retrovirus-related Pol polyprotein from transposon RE1	GO:0004190,GO:0004519,GO:0046872,GO:0003676,GO:0003964,GO:0015074,GO:0006310,GO:0006508	aspartic-type endopeptidase activity|endonuclease activity|metal ion binding|nucleic acid binding|RNA-directed DNA polymerase activity|DNA integration|DNA recombination|proteolysis
CSS0001403	-3.1757	0.0122728	Down	ACA12	Calcium-transporting ATPase 12, plasma membrane-type	GO:0043231,GO:0005886,GO:0005524,GO:0016887,GO:0019829,GO:0005516,GO:0046872,GO:0005388	intracellular membrane-bounded organelle|plasma membrane|ATP binding|ATP hydrolysis activity|ATPase-coupled cation transmembrane transporter activity|calmodulin binding|metal ion binding|P-type calcium transporter activity
CSS0001404	1.34055	0.371466	Up	At5g08350	GEM-like protein 4
CSS0001405	0.750693	0.0242734	Up	DRB1	Double-stranded RNA-binding protein 1	GO:0003725	double-stranded RNA binding
CSS0001406	-1.24266	0.0900131	Down	CML30	Calmodulin-like protein 30	GO:0005739,GO:0005509	mitochondrion|calcium ion binding	ko04626	Plant-pathogen interaction
CSS0001407	7.26098	0.000419642	Up	CCL5	Probable CoA ligase CCL5	GO:0005829,GO:0005524,GO:0016405	cytosol|ATP binding|CoA-ligase activity	ko00592	alpha-Linolenic acid metabolism
CSS0001408	0.76533	0.515764	Up		Isoflavone reductase homolog	GO:0016491,GO:0009807	oxidoreductase activity|lignan biosynthetic process	ko00999	Biosynthesis of various plant secondary metabolites
CSS0001410	-0.618225	0.833898	Down	CLPP5	ATP-dependent Clp protease proteolytic subunit 5, chloroplastic	GO:0009507,GO:0009941,GO:0009570,GO:0009534,GO:0009840,GO:0009368,GO:0005576,GO:0009532,GO:0009579,GO:0004176,GO:0051117,GO:0004252,GO:0006515	chloroplast|chloroplast envelope|chloroplast stroma|chloroplast thylakoid|chloroplastic endopeptidase Clp complex|endopeptidase Clp complex|extracellular region|plastid stroma|thylakoid|ATP-dependent peptidase activity|ATPase binding|serine-type endopeptidase activity|protein quality control for misfolded or incompletely synthesized proteins
CSS0001411	0.0328624	0.976	Up	At1g17520	Telomere repeat-binding factor 4	GO:0000786,GO:0005634,GO:0003700,GO:0003691,GO:0000976,GO:0006334	nucleosome|nucleus|DNA-binding transcription factor activity|double-stranded telomeric DNA binding|transcription cis-regulatory region binding|nucleosome assembly	ko04141	Protein processing in endoplasmic reticulum
CSS0001412	1.15324	0.0242872	Up	KAN2	Probable transcription factor KAN2	GO:0005634,GO:0003700,GO:0000976,GO:0010158,GO:0048440,GO:0048481,GO:0009944,GO:0006355	nucleus|DNA-binding transcription factor activity|transcription cis-regulatory region binding|abaxial cell fate specification|carpel development|plant ovule development|polarity specification of adaxial/abaxial axis|regulation of DNA-templated transcription
CSS0001414	-0.524267	0.117189	Down	RUS2	Protein root UVB sensitive 2, chloroplastic	GO:0009941,GO:0009536,GO:0009926,GO:0010224	chloroplast envelope|plastid|auxin polar transport|response to UV-B
CSS0001415	-0.781577	0.139942	Down
CSS0001418	-1.95205	0.224299	Down
CSS0001420	0.112698	0.80058	Up	MSRB2	Peptide methionine sulfoxide reductase B2, chloroplastic	GO:0009507,GO:0009570,GO:0005829,GO:0046872,GO:0033743,GO:0030091,GO:0006979	chloroplast|chloroplast stroma|cytosol|metal ion binding|peptide-methionine (R)-S-oxide reductase activity|protein repair|response to oxidative stress
CSS0001422	-1.62319	0.28382	Down	PCNA	Proliferating cell nuclear antigen	GO:0043626,GO:0003677,GO:0030337,GO:0006272,GO:0006298,GO:0006275,GO:0019985	PCNA complex|DNA binding|DNA polymerase processivity factor activity|leading strand elongation|mismatch repair|regulation of DNA replication|translesion synthesis	ko03030,ko03410,ko03420,ko03430	DNA replication|Base excision repair|Nucleotide excision repair|Mismatch repair
CSS0001423	6.68364	1.58403e-05	Up	LPAT5	Probable 1-acyl-sn-glycerol-3-phosphate acyltransferase 5	GO:0012505,GO:0016020,GO:0003841,GO:0016746,GO:0016024	endomembrane system|membrane|1-acylglycerol-3-phosphate O-acyltransferase activity|acyltransferase activity|CDP-diacylglycerol biosynthetic process	ko00561,ko00564	Glycerolipid metabolism|Glycerophospholipid metabolism
CSS0001426	0.291087	0.505424	Up	At5g13980	Probable alpha-mannosidase At5g13980	GO:0048046,GO:0000325,GO:0099503,GO:0005773,GO:0004559,GO:0030246,GO:0046872,GO:0006013	apoplast|plant-type vacuole|secretory vesicle|vacuole|alpha-mannosidase activity|carbohydrate binding|metal ion binding|mannose metabolic process	ko00511	Other glycan degradation
CSS0001427	1.33613	0.00237614	Up	CRTISO	Prolycopene isomerase, chloroplastic	GO:0031969,GO:0046608,GO:0016491,GO:0016117,GO:0009662	chloroplast membrane|carotenoid isomerase activity|oxidoreductase activity|carotenoid biosynthetic process|etioplast organization
CSS0001428	-0.836707	0.000228134	Down	FBX6	F-box only protein 6	GO:0004842,GO:0010305,GO:0010928,GO:0031146,GO:0060776	ubiquitin-protein transferase activity|leaf vascular tissue pattern formation|regulation of auxin mediated signaling pathway|SCF-dependent proteasomal ubiquitin-dependent protein catabolic process|simple leaf morphogenesis
CSS0001430	-0.448108	0.0436209	Down	SAC9	Probable phosphoinositide phosphatase SAC9	GO:0016791	phosphatase activity
CSS0001431	3.68232	0.350103	Up	BRCA2B	Protein BREAST CANCER SUSCEPTIBILITY 2 homolog B	GO:0005739,GO:0003677,GO:0000724,GO:0051321,GO:0006355	mitochondrion|DNA binding|double-strand break repair via homologous recombination|meiotic cell cycle|regulation of DNA-templated transcription	ko03440	Homologous recombination
CSS0001432	0.366728	0.12818	Up	PI4KA1	Phosphatidylinositol 4-kinase alpha 1	GO:0005737,GO:0031234,GO:0016020,GO:0098857,GO:0005634,GO:0048471,GO:0005886,GO:0098797,GO:0009506,GO:0004430,GO:0051015,GO:0001727,GO:0070300,GO:0052742,GO:0005546,GO:0070273,GO:0046854,GO:0048015,GO:0009555,GO:0006468,GO:0048831,GO:0048364	cytoplasm|extrinsic component of cytoplasmic side of plasma membrane|membrane|membrane microdomain|nucleus|perinuclear region of cytoplasm|plasma membrane|plasma membrane protein complex|plasmodesma|1-phosphatidylinositol 4-kinase activity|actin filament binding|lipid kinase activity|phosphatidic acid binding|phosphatidylinositol kinase activity|phosphatidylinositol-4,5-bisphosphate binding|phosp…	ko00562,ko04070	Inositol phosphate metabolism|Phosphatidylinositol signaling system
CSS0001434	-0.836717	0.056662	Down	RP1	Pyruvate, phosphate dikinase regulatory protein 1, chloroplastic	GO:0009507,GO:0009570,GO:0005524,GO:0004721,GO:0016776,GO:0004672,GO:0004674,GO:0016310	chloroplast|chloroplast stroma|ATP binding|phosphoprotein phosphatase activity|phosphotransferase activity, phosphate group as acceptor|protein kinase activity|protein serine/threonine kinase activity|phosphorylation
CSS0001435	-0.504003	0.0399919	Down	PFD5	Prefoldin subunit 5	GO:0005737,GO:0005634,GO:0009536,GO:0016272,GO:0051082,GO:0071370,GO:0009631,GO:0043622,GO:0006397,GO:0006457,GO:1901703,GO:0009409,GO:0009651	cytoplasm|nucleus|plastid|prefoldin complex|unfolded protein binding|cellular response to gibberellin stimulus|cold acclimation|cortical microtubule organization|mRNA processing|protein folding|protein localization involved in auxin polar transport|response to cold|response to salt stress
CSS0001436	2.6826	6.45332e-06	Up
CSS0001437	-0.905974	0.143848	Down	At3g13620	Probable polyamine transporter At3g13620	GO:0005886,GO:0015203,GO:0015293,GO:0015846	plasma membrane|polyamine transmembrane transporter activity|symporter activity|polyamine transport
CSS0001438	0.239009	0.480978	Up	INVB	Probable alkaline/neutral invertase B	GO:0033926,GO:0004575,GO:0005987	glycopeptide alpha-N-acetylgalactosaminidase activity|sucrose alpha-glucosidase activity|sucrose catabolic process
CSS0001440	-0.0544491	0.924077	Down
CSS0001442	1.0179	0.0731141	Up	PAL	Phenylalanine ammonia-lyase	GO:0005737,GO:0045548,GO:0009800,GO:0006559	cytoplasm|phenylalanine ammonia-lyase activity|cinnamic acid biosynthetic process|L-phenylalanine catabolic process	ko00360,ko00940	Phenylalanine metabolism|Phenylpropanoid biosynthesis
CSS0001444	1.2882	0.000511652	Up	CAS	Calcium sensing receptor, chloroplastic	GO:0009507,GO:0009534,GO:0009535,GO:0005739,GO:0009536,GO:0009579,GO:0071277,GO:0009704,GO:0090333	chloroplast|chloroplast thylakoid|chloroplast thylakoid membrane|mitochondrion|plastid|thylakoid|cellular response to calcium ion|de-etiolation|regulation of stomatal closure
CSS0001445	0.479335	0.299864	Up	PSBR	Photosystem II 10 kDa polypeptide, chloroplastic	GO:0009535,GO:0009654,GO:0015979	chloroplast thylakoid membrane|photosystem II oxygen evolving complex|photosynthesis	ko00195	Photosynthesis
CSS0001446	-1.09722	0.0200539	Down
CSS0001447	0.477064	0.204422	Up	UGT80A2	Sterol 3-beta-glucosyltransferase UGT80A2	GO:0005829,GO:0005886,GO:0051507,GO:0102203,GO:0102205,GO:0102202,GO:0016906,GO:0005975,GO:0030259,GO:0048316,GO:0016126,GO:0016125	cytosol|plasma membrane|beta-sitosterol UDP-glucosyltransferase activity|brassicasterol glucosyltransferase activity|cholesterol alpha-glucosyltransferase activity|soladodine glucosyltransferase activity|sterol 3-beta-glucosyltransferase activity|carbohydrate metabolic process|lipid glycosylation|seed development|sterol biosynthetic process|sterol metabolic process
CSS0001448	-0.912614	0.145235	Down	CDKC-2	Cyclin-dependent kinase C-2	GO:0000307,GO:0005634,GO:0005524,GO:0004693,GO:0106310,GO:0008353,GO:0070816,GO:0032968,GO:0006468	cyclin-dependent protein kinase holoenzyme complex|nucleus|ATP binding|cyclin-dependent protein serine/threonine kinase activity|protein serine kinase activity|RNA polymerase II CTD heptapeptide repeat kinase activity|phosphorylation of RNA polymerase II C-terminal domain|positive regulation of transcription elongation by RNA polymerase II|protein phosphorylation
CSS0001449	-0.485326	0.478973	Down	EMB1025	Pentatricopeptide repeat-containing protein At4g20090	GO:0009793	embryo development ending in seed dormancy
CSS0001450	0.501549	0.417329	Up	NAC021	NAC domain-containing protein 21/22	GO:0005634,GO:0003677,GO:0003700,GO:0009734,GO:0048527	nucleus|DNA binding|DNA-binding transcription factor activity|auxin-activated signaling pathway|lateral root development
CSS0001451	-3.43896	0.0141791	Down	SMC2-2	Structural maintenance of chromosomes protein 2-2	GO:0000785,GO:0000793,GO:0000796,GO:0005634,GO:0005524,GO:0016887,GO:0003682,GO:0051301,GO:0051321,GO:0007076	chromatin|condensed chromosome|condensin complex|nucleus|ATP binding|ATP hydrolysis activity|chromatin binding|cell division|meiotic cell cycle|mitotic chromosome condensation
CSS0001455	2.89069	0.0788689	Up	PK1	Putative receptor protein kinase ZmPK1	GO:0016020,GO:0005524,GO:0106310,GO:0004674,GO:0006468,GO:0048544	membrane|ATP binding|protein serine kinase activity|protein serine/threonine kinase activity|protein phosphorylation|recognition of pollen
CSS0001456	0.637085	0.18231	Up	UGT92A1	UDP-glycosyltransferase 92A1	GO:0008194	UDP-glycosyltransferase activity
CSS0001457	0.355691	0.377199	Up	At1g78690	N-acylphosphatidylethanolamine synthase	GO:0005886,GO:0016746,GO:0071617,GO:0008374,GO:0006650,GO:0008654	plasma membrane|acyltransferase activity|lysophospholipid acyltransferase activity|O-acyltransferase activity|glycerophospholipid metabolic process|phospholipid biosynthetic process	ko00564	Glycerophospholipid metabolism
CSS0001458	1.44961	3.0746e-05	Up	ANN2	Annexin D2	GO:0005737,GO:0005829,GO:0016020,GO:0009536,GO:0009579,GO:0005509,GO:0005544,GO:0110128,GO:0015774,GO:0080022,GO:0009409,GO:0009408,GO:0009651,GO:0009414	cytoplasm|cytosol|membrane|plastid|thylakoid|calcium ion binding|calcium-dependent phospholipid binding|phloem sucrose unloading|polysaccharide transport|primary root development|response to cold|response to heat|response to salt stress|response to water deprivation
CSS0001459	7.46663	2.22067e-05	Up
CSS0001460	-0.217932	0.637763	Down	PSI2	Protein PSK SIMULATOR 2	GO:0005634,GO:0003746,GO:0045927,GO:0043434	nucleus|translation elongation factor activity|positive regulation of growth|response to peptide hormone
CSS0001461	-0.769306	0.228742	Down	MED19A	Mediator of RNA polymerase II transcription subunit 19a	GO:0016592,GO:0003712,GO:0045944	mediator complex|transcription coregulator activity|positive regulation of transcription by RNA polymerase II
CSS0001462	-0.457884	0.167661	Down	NYC1	Probable chlorophyll(ide) b reductase NYC1, chloroplastic	GO:0009535,GO:0009536,GO:0034256,GO:0016491,GO:0015996,GO:0010304	chloroplast thylakoid membrane|plastid|chlorophyll(ide) b reductase activity|oxidoreductase activity|chlorophyll catabolic process|PSII associated light-harvesting complex II catabolic process	ko00860	Porphyrin metabolism
CSS0001463	-0.620399	0.317759	Down	GGCT22	Gamma-glutamylcyclotransferase 2-2	GO:0005737,GO:0003839,GO:0006751	cytoplasm|gamma-glutamylcyclotransferase activity|glutathione catabolic process	ko00480	Glutathione metabolism
CSS0001466	0.98462	0.163002	Up
CSS0001467	-0.25292	0.671441	Down	TAF13	Transcription initiation factor TFIID subunit 13	GO:0005634,GO:0005886,GO:0046982,GO:0009793,GO:0009960,GO:0048316,GO:0006366	nucleus|plasma membrane|protein heterodimerization activity|embryo development ending in seed dormancy|endosperm development|seed development|transcription by RNA polymerase II	ko03022	Basal transcription factors
CSS0001470	3.81035	0.332527	Up	GLOX	Aldehyde oxidase GLOX	GO:0005615,GO:0004031,GO:0050832	extracellular space|aldehyde oxidase activity|defense response to fungus
CSS0001471	3.02215	0.00191891	Up	RTNLB17	Reticulon-like protein B17	GO:0005789	endoplasmic reticulum membrane
CSS0001472	-0.411157	0.343512	Down	At5g47890	NADH dehydrogenase [ubiquinone] 1 alpha subcomplex subunit 2	GO:0005747,GO:0005739,GO:0009536	mitochondrial respiratory chain complex I|mitochondrion|plastid	ko00190	Oxidative phosphorylation
CSS0001473	0.496016	0.331837	Up	CBP60A	Calmodulin-binding protein 60 A	GO:0005634,GO:0005516,GO:0003700,GO:0043565,GO:1900425,GO:0080142	nucleus|calmodulin binding|DNA-binding transcription factor activity|sequence-specific DNA binding|negative regulation of defense response to bacterium|regulation of salicylic acid biosynthetic process
CSS0001474	-0.353752	0.0678021	Down	At1g75220	Sugar transporter ERD6-like 6	GO:0005794,GO:0016020,GO:0005739,GO:0000325,GO:0009705,GO:0051119,GO:0022857,GO:0042593,GO:0010030,GO:0055085	Golgi apparatus|membrane|mitochondrion|plant-type vacuole|plant-type vacuole membrane|sugar transmembrane transporter activity|transmembrane transporter activity|glucose homeostasis|positive regulation of seed germination|transmembrane transport
CSS0001477	0.134716	0.674754	Up	SMD1A	Small nuclear ribonucleoprotein SmD1a	GO:0071013,GO:0000243,GO:0016607,GO:0005730,GO:0005634,GO:0034715,GO:0000325,GO:0071011,GO:0034719,GO:0097526,GO:0005685,GO:0005689,GO:0005686,GO:0005687,GO:0005682,GO:0003723,GO:0035194,GO:0000387	catalytic step 2 spliceosome|commitment complex|nuclear speck|nucleolus|nucleus|pICln-Sm protein complex|plant-type vacuole|precatalytic spliceosome|SMN-Sm protein complex|spliceosomal tri-snRNP complex|U1 snRNP|U12-type spliceosomal complex|U2 snRNP|U4 snRNP|U5 snRNP|RNA binding|RNA-mediated post-transcriptional gene silencing|spliceosomal snRNP assembly	ko03040	Spliceosome
CSS0001478	3.08776	0.0136489	Up
CSS0001480	0.836316	0.362122	Up	TIC32B	Short-chain dehydrogenase TIC 32 B, chloroplastic	GO:0009706,GO:0005516,GO:0016491,GO:0015031	chloroplast inner membrane|calmodulin binding|oxidoreductase activity|protein transport
CSS0001481	0.367819	0.318993	Up	At1g73400	Pentatricopeptide repeat-containing protein At1g73400, mitochondrial	GO:0005739	mitochondrion
CSS0001484	0.623253	0.376899	Up
CSS0001486	-1.20999	6.24562e-06	Down	GDI1	Rho GDP-dissociation inhibitor 1	GO:0005829,GO:0016020,GO:0005096,GO:0005094,GO:0009932,GO:0007266,GO:0010053	cytosol|membrane|GTPase activator activity|Rho GDP-dissociation inhibitor activity|cell tip growth|Rho protein signal transduction|root epidermal cell differentiation
CSS0001488	1.28073	0.328779	Up	PSY3	Protein PSY3	GO:0005576,GO:0008083	extracellular region|growth factor activity
CSS0001490	-0.618281	0.17905	Down	At3g17800	UV-B-induced protein At3g17800, chloroplastic	GO:0009507,GO:0010193,GO:0010224,GO:0009611	chloroplast|response to ozone|response to UV-B|response to wounding
CSS0001492	0.334585	0.581524	Up	DG1	Pentatricopeptide repeat-containing protein At5g67570, chloroplastic	GO:0009507,GO:0009658,GO:0042793	chloroplast|chloroplast organization|plastid transcription
CSS0001493	0.504472	0.34746	Up	MYOB7	Myosin-binding protein 7	GO:0016020,GO:0030133,GO:0017022,GO:0080115	membrane|transport vesicle|myosin binding|myosin XI tail binding
CSS0001495	-1.49139	0.0359835	Down	FLS5	Probable flavonol synthase 5	GO:0051213,GO:0045431,GO:0046872,GO:0009416	dioxygenase activity|flavonol synthase activity|metal ion binding|response to light stimulus
CSS0001496	0.238347	0.318868	Up	At4g08455	BTB/POZ domain-containing protein At4g08455	GO:0005737,GO:0031625,GO:0043161,GO:0016567,GO:0030162	cytoplasm|ubiquitin protein ligase binding|proteasome-mediated ubiquitin-dependent protein catabolic process|protein ubiquitination|regulation of proteolysis
CSS0001498	0.0420942	0.953969	Up
CSS0001500	1.32921	0.000902288	Up
CSS0001501	1.37639	0.286173	Up	STR11	Rhodanese-like domain-containing protein 11, chloroplastic	GO:0009507,GO:0005829	chloroplast|cytosol
CSS0001502	-0.6154	0.366437	Down
CSS0001503	0.282273	0.326655	Up
CSS0001504	0.77748	0.0565746	Up	PPH	Pheophytinase, chloroplastic	GO:0009507,GO:0009570,GO:0009535,GO:0080124,GO:0015996	chloroplast|chloroplast stroma|chloroplast thylakoid membrane|pheophytinase activity|chlorophyll catabolic process
CSS0001506	-0.9893	0.635034	Down
CSS0001508	-0.396067	0.795001	Down	At5g40240	WAT1-related protein At5g40240	GO:0005886,GO:0022857	plasma membrane|transmembrane transporter activity
CSS0001509	-0.875404	0.0155895	Down	BETVIII	Calcium-binding allergen Bet v 3	GO:0005509	calcium ion binding	ko04626	Plant-pathogen interaction
CSS0001510	-1.00978	0.00092956	Down	At5g65490	Protein ecdysoneless homolog	GO:0005634	nucleus
CSS0001511	1.49071	0.000392509	Up	At2g19130	G-type lectin S-receptor-like serine/threonine-protein kinase At2g19130	GO:0005886,GO:0005524,GO:0005516,GO:0030246,GO:0106310,GO:0004674,GO:0031625,GO:0006468,GO:0048544	plasma membrane|ATP binding|calmodulin binding|carbohydrate binding|protein serine kinase activity|protein serine/threonine kinase activity|ubiquitin protein ligase binding|protein phosphorylation|recognition of pollen
CSS0001512	0.239547	0.569812	Up	YDA	Mitogen-activated protein kinase kinase kinase YODA	GO:0005938,GO:0005737,GO:0005886,GO:0005524,GO:0004709,GO:0106310,GO:0010229,GO:0000165,GO:0006468,GO:0010103,GO:0010098	cell cortex|cytoplasm|plasma membrane|ATP binding|MAP kinase kinase kinase activity|protein serine kinase activity|inflorescence development|MAPK cascade|protein phosphorylation|stomatal complex morphogenesis|suspensor development	ko04016	MAPK signaling pathway - plant
CSS0001514	0.816145	0.0131357	Up	MIK2	MDIS1-interacting receptor like kinase 2	GO:0005886,GO:0009506,GO:0090406,GO:0005524,GO:0042277,GO:0001653,GO:0106310,GO:0004674,GO:1901653,GO:0002213,GO:0009755,GO:0009759,GO:0009695,GO:0010183,GO:0031349,GO:0006468,GO:0080027,GO:0002237	plasma membrane|plasmodesma|pollen tube|ATP binding|peptide binding|peptide receptor activity|protein serine kinase activity|protein serine/threonine kinase activity|cellular response to peptide|defense response to insect|hormone-mediated signaling pathway|indole glucosinolate biosynthetic process|jasmonic acid biosynthetic process|pollen tube guidance|positive regulation of defense response|prot…
CSS0001516	0.809719	0.0960807	Up
CSS0001517	0.902342	0.683611	Up		Retrovirus-related Pol polyprotein from transposon TNT 1-94	GO:0004190,GO:0004519,GO:0003676,GO:0003964,GO:0008270,GO:0015074,GO:0006508	aspartic-type endopeptidase activity|endonuclease activity|nucleic acid binding|RNA-directed DNA polymerase activity|zinc ion binding|DNA integration|proteolysis
CSS0001519	-2.17284	0.00190382	Down	SYP132	Syntaxin-132	GO:0012505,GO:0016020,GO:0005886,GO:0031201,GO:0005484,GO:0000149,GO:0007049,GO:0051301,GO:0006887,GO:0006886,GO:0048278,GO:0006906	endomembrane system|membrane|plasma membrane|SNARE complex|SNAP receptor activity|SNARE binding|cell cycle|cell division|exocytosis|intracellular protein transport|vesicle docking|vesicle fusion	ko04130	SNARE interactions in vesicular transport
CSS0001520	-2.65357	0.486122	Down	OBAP2A	Oil body-associated protein 2A
CSS0001521	0.617944	0.559425	Up	At3g59040	Pentatricopeptide repeat-containing protein At3g59040
CSS0001525	0.716678	0.0418255	Up					ko03018	RNA degradation
CSS0001527	-0.731504	0.359518	Down
CSS0001528	-0.418962	0.410374	Down	At1g23390	F-box/kelch-repeat protein At1g23390	GO:0005737,GO:0005829,GO:0005634,GO:0043161	cytoplasm|cytosol|nucleus|proteasome-mediated ubiquitin-dependent protein catabolic process
CSS0001529	-0.201287	0.375416	Down					ko03040	Spliceosome
CSS0001530	-1.94326	0.0728812	Down	UGT85A24	7-deoxyloganetin glucosyltransferase	GO:0035251	UDP-glucosyltransferase activity
CSS0001531	0.678097	0.307022	Up
CSS0001532	5.64658	0.0505094	Up	GBP	Glucan endo-1,3-beta-D-glucosidase	GO:0005576,GO:0009505,GO:0042973,GO:0052861,GO:0052862,GO:0030247,GO:0071555,GO:0044347,GO:0009603	extracellular region|plant-type cell wall|glucan endo-1,3-beta-D-glucosidase activity|glucan endo-1,3-beta-glucanase activity, C-3 substituted reducing group|glucan endo-1,4-beta-glucanase activity, C-3 substituted reducing group|polysaccharide binding|cell wall organization|cell wall polysaccharide catabolic process|detection of symbiotic fungus
CSS0001533	-0.415747	0.116418	Down
CSS0001536	-0.309483	0.544256	Down
CSS0001537	-0.615309	0.448411	Down	NSH3	Nucleoside hydrolase 3	GO:0048046,GO:0047622,GO:0047724,GO:0006154,GO:0006148,GO:0009753,GO:0009611	apoplast|adenosine nucleosidase activity|inosine nucleosidase activity|adenosine catabolic process|inosine catabolic process|response to jasmonic acid|response to wounding
CSS0001538	-0.214512	0.646516	Down		Glycerol-3-phosphate acyltransferase, chloroplastic	GO:0009570,GO:0004366,GO:0102420,GO:0016024	chloroplast stroma|glycerol-3-phosphate O-acyltransferase activity|sn-1-glycerol-3-phosphate C16:0-DCA-CoA acyl transferase activity|CDP-diacylglycerol biosynthetic process	ko00561,ko00564	Glycerolipid metabolism|Glycerophospholipid metabolism
CSS0001539	-1.17514	0.414794	Down	CDC48C	Cell division control protein 48 homolog C	GO:0005856,GO:0005634,GO:0009524,GO:0005524,GO:0016887,GO:1990275,GO:0007049,GO:0051301,GO:0051973,GO:0015031,GO:0042254	cytoskeleton|nucleus|phragmoplast|ATP binding|ATP hydrolysis activity|preribosome binding|cell cycle|cell division|positive regulation of telomerase activity|protein transport|ribosome biogenesis	ko03008	Ribosome biogenesis in eukaryotes
CSS0001540	-0.454455	0.867726	Down	At3g54510	CSC1-like protein At3g54510	GO:0005886,GO:0005227	plasma membrane|calcium activated cation channel activity
CSS0001541	0.349916	0.834356	Up	MED26B	Probable mediator of RNA polymerase II transcription subunit 26b	GO:0005634,GO:0003746	nucleus|translation elongation factor activity
CSS0001542	0.636352	0.242628	Up
CSS0001543	0.471334	0.767427	Up	PECS-2.1	Pectinesterase 2	GO:0005576,GO:0045330,GO:0004857,GO:0030599,GO:0042545,GO:0045490	extracellular region|aspartyl esterase activity|enzyme inhibitor activity|pectinesterase activity|cell wall modification|pectin catabolic process	ko00040	Pentose and glucuronate interconversions
CSS0001544	3.87504	1.86159e-17	Up	NPR4	Ankyrin repeat-containing protein NPR4	GO:0016020,GO:0005886	membrane|plasma membrane
CSS0001545	0.389987	0.517682	Up	PDS5D	Sister chromatid cohesion protein PDS5 homolog D	GO:0005634,GO:0051301,GO:0006310,GO:0006281,GO:0035825,GO:0007064	nucleus|cell division|DNA recombination|DNA repair|homologous recombination|mitotic sister chromatid cohesion
CSS0001546	0.60091	0.0899718	Up	At3g59480	Probable fructokinase-4	GO:0005829,GO:0005524,GO:0008865,GO:0006000,GO:0019252	cytosol|ATP binding|fructokinase activity|fructose metabolic process|starch biosynthetic process	ko00051,ko00500,ko00520	Fructose and mannose metabolism|Starch and sucrose metabolism|Amino sugar and nucleotide sugar metabolism
CSS0001547	-0.370851	0.808842	Down	LTPG20	Non-specific lipid transfer protein GPI-anchored 20	GO:0009941,GO:0005886	chloroplast envelope|plasma membrane
CSS0001549	-0.803674	0.246493	Down	CRPK1	Cold-responsive protein kinase 1	GO:0005634,GO:0005886,GO:0005524,GO:0106310,GO:0004674,GO:0046777,GO:0009409,GO:0050826,GO:0009625,GO:0002237	nucleus|plasma membrane|ATP binding|protein serine kinase activity|protein serine/threonine kinase activity|protein autophosphorylation|response to cold|response to freezing|response to insect|response to molecule of bacterial origin
CSS0001551	-0.454685	0.085261	Down	URH2	Probable uridine nucleosidase 2	GO:0005829,GO:0047724,GO:0046982,GO:0008477,GO:0035251,GO:0045437,GO:0072585,GO:0006148,GO:0010150,GO:0006152	cytosol|inosine nucleosidase activity|protein heterodimerization activity|purine nucleosidase activity|UDP-glucosyltransferase activity|uridine nucleosidase activity|xanthosine nucleotidase activity|inosine catabolic process|leaf senescence|purine nucleoside catabolic process	ko00240,ko00760	Pyrimidine metabolism|Nicotinate and nicotinamide metabolism
CSS0001553	-1.53836	0.000704474	Down	AKR4C9	NADPH-dependent aldo-keto reductase, chloroplastic	GO:0009507,GO:0005829,GO:0005783,GO:0008106,GO:0004032,GO:0004033,GO:0070401,GO:0016229,GO:0009409,GO:0009651,GO:0009636,GO:0009414	chloroplast|cytosol|endoplasmic reticulum|alcohol dehydrogenase (NADP+) activity|alditol:NADP+ 1-oxidoreductase activity|aldo-keto reductase (NADP) activity|NADP+ binding|steroid dehydrogenase activity|response to cold|response to salt stress|response to toxic substance|response to water deprivation	ko00010,ko00040,ko00053,ko00620,ko00561	Glycolysis / Gluconeogenesis|Pentose and glucuronate interconversions|Ascorbate and aldarate metabolism|Pyruvate metabolism|Glycerolipid metabolism
CSS0001554	1.39526	0.0253152	Up	PUB30	U-box domain-containing protein 30	GO:0061630,GO:0071472,GO:1901001	ubiquitin protein ligase activity|cellular response to salt stress|negative regulation of response to salt stress
CSS0001555	0.0610247	0.868555	Up	GDPD6	Glycerophosphodiester phosphodiesterase GDPD6	GO:0008889,GO:0006071,GO:0006629	glycerophosphodiester phosphodiesterase activity|glycerol metabolic process|lipid metabolic process	ko00564	Glycerophospholipid metabolism
CSS0001556	-3.50366	0.123274	Down	GID1C	Gibberellin receptor GID1C	GO:0005737,GO:0005634,GO:0010331,GO:0016787,GO:0048444,GO:0048530,GO:0010476,GO:0010629,GO:0009939,GO:0010325,GO:0009739	cytoplasm|nucleus|gibberellin binding|hydrolase activity|floral organ morphogenesis|fruit morphogenesis|gibberellin mediated signaling pathway|negative regulation of gene expression|positive regulation of gibberellic acid mediated signaling pathway|raffinose family oligosaccharide biosynthetic process|response to gibberellin	ko04075	Plant hormone signal transduction
CSS0001557	0.233691	0.388595	Up	At5g46680	Pentatricopeptide repeat-containing protein At5g46680
CSS0001559	-1.84273	0.292831	Down	SECA2	Protein translocase subunit SECA2, chloroplastic	GO:0031969,GO:0015462,GO:0005524,GO:0016464,GO:0017038,GO:0006605	chloroplast membrane|ABC-type protein transporter activity|ATP binding|chloroplast protein-transporting ATPase activity|protein import|protein targeting	ko03060	Protein export
CSS0001560	0.122929	0.787298	Up	At1g29970	60S ribosomal protein L18a-like protein	GO:1990904,GO:0005840	ribonucleoprotein complex|ribosome
CSS0001561	4.35154	4.93066e-12	Up	NHL1	NDR1/HIN1-like protein 1	GO:0005886,GO:0009506,GO:0051607	plasma membrane|plasmodesma|defense response to virus
CSS0001562	1.19288	0.223803	Up	PYD3	Beta-ureidopropionase	GO:0005829,GO:0003837,GO:0016811,GO:0033396,GO:0043562,GO:0006212	cytosol|beta-ureidopropionase activity|hydrolase activity, acting on carbon-nitrogen (but not peptide) bonds, in linear amides|beta-alanine biosynthetic process via 3-ureidopropionate|cellular response to nitrogen levels|uracil catabolic process	ko00240,ko00410,ko00770	Pyrimidine metabolism|beta-Alanine metabolism|Pantothenate and CoA biosynthesis
CSS0001563	-0.0275056	0.975326	Down
CSS0001564	0.141782	0.631314	Up	AUG5	AUGMIN subunit 5	GO:0070652,GO:0009524,GO:0005876,GO:0051011,GO:0051301,GO:0051225	HAUS complex|phragmoplast|spindle microtubule|microtubule minus-end binding|cell division|spindle assembly
CSS0001565	0.633782	0.0634418	Up
CSS0001566	-5.29198	0.0929078	Down	GA2OX2	Gibberellin 2-beta-dioxygenase 2	GO:0052634,GO:0046872,GO:0009686	C-19 gibberellin 2-beta-dioxygenase activity|metal ion binding|gibberellin biosynthetic process	ko00904	Diterpenoid biosynthesis
CSS0001567	0.0537389	0.849501	Up
CSS0001568	0.0179511	0.962425	Up	PGRL1A	PGR5-like protein 1A, chloroplastic	GO:0009507,GO:0009534,GO:0009535,GO:0005829,GO:0009579,GO:0042802,GO:0016730,GO:0019904,GO:0009773	chloroplast|chloroplast thylakoid|chloroplast thylakoid membrane|cytosol|thylakoid|identical protein binding|oxidoreductase activity, acting on iron-sulfur proteins as donors|protein domain specific binding|photosynthetic electron transport in photosystem I
CSS0001570	0.303448	0.819061	Up
CSS0001573	-2.89942	8.68796e-05	Down	DTX16	Protein DETOXIFICATION 16	GO:0016020,GO:0000325,GO:0009536,GO:0015297,GO:0022857,GO:0042910,GO:0009624,GO:1990961	membrane|plant-type vacuole|plastid|antiporter activity|transmembrane transporter activity|xenobiotic transmembrane transporter activity|response to nematode|xenobiotic detoxification by transmembrane export across the plasma membrane
CSS0001574	5.85724	1.31615e-05	Up	ROPGEF5	Rop guanine nucleotide exchange factor 5	GO:0005085	guanyl-nucleotide exchange factor activity
CSS0001575	-1.47402	0.528297	Down
CSS0001576	-0.493361	0.166286	Down					ko00564,ko00565	Glycerophospholipid metabolism|Ether lipid metabolism
CSS0001581	-0.0928057	0.765441	Down
CSS0001583	-0.274482	0.604718	Down	MPC4	Mitochondrial pyruvate carrier 4	GO:0005829,GO:0005743,GO:0005739,GO:0006850	cytosol|mitochondrial inner membrane|mitochondrion|mitochondrial pyruvate transmembrane transport
CSS0001584	-0.400291	0.488286	Down	ILR3	Transcription factor ILR3	GO:0005634,GO:0003700,GO:0046983,GO:0000976,GO:0019760,GO:0055072,GO:0006355	nucleus|DNA-binding transcription factor activity|protein dimerization activity|transcription cis-regulatory region binding|glucosinolate metabolic process|iron ion homeostasis|regulation of DNA-templated transcription
CSS0001588	-0.370352	0.708133	Down
CSS0001591	-0.15125	0.795494	Down	GLCAT14A	Beta-glucuronosyltransferase GlcAT14A	GO:0005794,GO:0000139,GO:0015020,GO:0009826	Golgi apparatus|Golgi membrane|glucuronosyltransferase activity|unidimensional cell growth
CSS0001592	-0.47907	0.51054	Down
CSS0001593	-0.011188	0.99369	Down	RTNLB21	Reticulon-like protein B21	GO:0005789	endoplasmic reticulum membrane
CSS0001594	1.96369	0.320612	Up					ko04130	SNARE interactions in vesicular transport
CSS0001595	-0.735748	0.244115	Down	PLP6	Patatin-like protein 6	GO:0005886,GO:0016787,GO:0016298,GO:0004620,GO:0006952,GO:0016042	plasma membrane|hydrolase activity|lipase activity|phospholipase activity|defense response|lipid catabolic process
CSS0001597	-2.56398	0.0127467	Down	MOS14	Transportin MOS14	GO:0005737,GO:0005634,GO:0031267,GO:0006606,GO:0043484	cytoplasm|nucleus|small GTPase binding|protein import into nucleus|regulation of RNA splicing	ko03013,ko03250	Nucleocytoplasmic transport|Viral life cycle - HIV-1
CSS0001598	3.20235	0.00105777	Up	Y-3	Uncharacterized protein At3g17950
CSS0001600	1.38467	5.74548e-05	Up	At2g27310	F-box protein At2g27310
CSS0001601	-1.87181	0.493084	Down
CSS0001603	-0.593999	0.545398	Down
CSS0001604	-0.0853454	0.839214	Down
CSS0001605	-0.220708	0.460076	Down
CSS0001606	0.0902035	0.931362	Up
CSS0001607	1.6956	0.330372	Up	RPV1	Disease resistance protein RPV1	GO:0005737,GO:0005634,GO:0043531,GO:0050135,GO:0061809,GO:0042803,GO:0050832,GO:0043068,GO:0007165	cytoplasm|nucleus|ADP binding|NAD(P)+ nucleosidase activity|NAD+ nucleotidase, cyclic ADP-ribose generating|protein homodimerization activity|defense response to fungus|positive regulation of programmed cell death|signal transduction
CSS0001608	-0.156726	0.667239	Down	JMJ25	Lysine-specific demethylase JMJ25	GO:0000785,GO:0000118,GO:0031490,GO:0032454,GO:0140683,GO:0046872,GO:0003712,GO:0032776,GO:0040029,GO:0033169,GO:0006357,GO:0010440	chromatin|histone deacetylase complex|chromatin DNA binding|histone H3K9 demethylase activity|histone H3K9me/H3K9me2 demethylase activity|metal ion binding|transcription coregulator activity|DNA methylation on cytosine|epigenetic regulation of gene expression|histone H3-K9 demethylation|regulation of transcription by RNA polymerase II|stomatal lineage progression
CSS0001609	1.0126	0.132853	Up	RPN12A	26S proteasome non-ATPase regulatory subunit 8 homolog A	GO:0009941,GO:0005634,GO:0000502,GO:0008541,GO:0048825,GO:0009736,GO:0009908,GO:0048366,GO:0048528,GO:0043248,GO:0043161,GO:0030163,GO:0031540,GO:0009733,GO:0009735,GO:0009408,GO:0051788,GO:0009647	chloroplast envelope|nucleus|proteasome complex|proteasome regulatory particle, lid subcomplex|cotyledon development|cytokinin-activated signaling pathway|flower development|leaf development|post-embryonic root development|proteasome assembly|proteasome-mediated ubiquitin-dependent protein catabolic process|protein catabolic process|regulation of anthocyanin biosynthetic process|response to auxin…	ko03050	Proteasome
CSS0001610	-0.188571	0.562782	Down	At1g62620	Flavin-containing monooxygenase FMO GS-OX-like 3	GO:0050660,GO:0004499,GO:0050661	flavin adenine dinucleotide binding|N,N-dimethylaniline monooxygenase activity|NADP binding
CSS0001611	-0.599535	0.0376058	Down	FIGL1	ATPase family AAA domain-containing protein FIGL1	GO:0005634,GO:0005524,GO:0016887,GO:0006310,GO:0006281,GO:0045128	nucleus|ATP binding|ATP hydrolysis activity|DNA recombination|DNA repair|negative regulation of reciprocal meiotic recombination
CSS0001612	-0.718683	0.185841	Down	PUMY	Pseudouridine-5'-phosphate glycosidase	GO:0005777,GO:0046872,GO:0004730,GO:0030597	peroxisome|metal ion binding|pseudouridylate synthase activity|RNA glycosylase activity	ko00240	Pyrimidine metabolism
CSS0001619	-0.247885	0.662581	Down
CSS0001622	0.284188	0.811116	Up	FRAA3	Major strawberry allergen Fra a 1-3	GO:0010427,GO:0004864,GO:0038023,GO:0009738,GO:0006952,GO:0009813,GO:0009607	abscisic acid binding|protein phosphatase inhibitor activity|signaling receptor activity|abscisic acid-activated signaling pathway|defense response|flavonoid biosynthetic process|response to biotic stimulus
CSS0001623	-2.79439	0.0580417	Down
CSS0001624	-0.0110971	0.975022	Down	NRPB4	DNA-directed RNA polymerase II subunit 4	GO:0000932,GO:0005665,GO:0003899,GO:0000166,GO:0031369,GO:0031990,GO:0000288,GO:0045948,GO:0034402,GO:0006366,GO:0006367	P-body|RNA polymerase II, core complex|DNA-directed 5'-3' RNA polymerase activity|nucleotide binding|translation initiation factor binding|mRNA export from nucleus in response to heat stress|nuclear-transcribed mRNA catabolic process, deadenylation-dependent decay|positive regulation of translational initiation|recruitment of 3'-end processing factors to RNA polymerase II holoenzyme complex|trans…	ko03020,ko03420	RNA polymerase|Nucleotide excision repair
CSS0001625	-0.396385	0.144	Down	NUP214	Nuclear pore complex protein NUP214	GO:0005739,GO:0005643,GO:0008139,GO:0017056,GO:0009793,GO:0051028,GO:0006606,GO:0006405,GO:0010070	mitochondrion|nuclear pore|nuclear localization sequence binding|structural constituent of nuclear pore|embryo development ending in seed dormancy|mRNA transport|protein import into nucleus|RNA export from nucleus|zygote asymmetric cell division	ko03013	Nucleocytoplasmic transport
CSS0001626	-0.235463	0.617316	Down	PUP3	Purine permease 3	GO:0016020,GO:0005345,GO:0015211,GO:0006863	membrane|purine nucleobase transmembrane transporter activity|purine nucleoside transmembrane transporter activity|purine nucleobase transport
CSS0001627	-0.486895	0.0423248	Down	ELM1	Mitochondrial fission protein ELM1	GO:0005829,GO:0005741,GO:0000266,GO:0033365	cytosol|mitochondrial outer membrane|mitochondrial fission|protein localization to organelle
CSS0001630	-0.17453	0.631897	Down
CSS0001631	-0.320242	0.106231	Down	KUA1	Transcription factor KUA1	GO:0005634,GO:0003700,GO:0000976,GO:0008270,GO:0010252,GO:0048527,GO:0048366,GO:0010150,GO:0045892,GO:2000469,GO:0000122,GO:0030307,GO:0090697,GO:0006355,GO:0009737,GO:0009646,GO:0009733,GO:0009723,GO:0009739	nucleus|DNA-binding transcription factor activity|transcription cis-regulatory region binding|zinc ion binding|auxin homeostasis|lateral root development|leaf development|leaf senescence|negative regulation of DNA-templated transcription|negative regulation of peroxidase activity|negative regulation of transcription by RNA polymerase II|positive regulation of cell growth|post-embryonic plant orga…
CSS0001632	2.80492	0.00209281	Up	At5g10770	Aspartyl protease family protein At5g10770	GO:0005886,GO:0004190,GO:0006508	plasma membrane|aspartic-type endopeptidase activity|proteolysis
CSS0001633	3.90637	0.320967	Up	ACHE	GDSL esterase/lipase ACHE	GO:0005576,GO:0016788,GO:0006581,GO:0016042	extracellular region|hydrolase activity, acting on ester bonds|acetylcholine catabolic process|lipid catabolic process
CSS0001635	-0.694826	0.245963	Down	BHLH153	Transcription factor bHLH153	GO:0005634,GO:0003700,GO:0000981,GO:0046983,GO:0000978,GO:0006357	nucleus|DNA-binding transcription factor activity|DNA-binding transcription factor activity, RNA polymerase II-specific|protein dimerization activity|RNA polymerase II cis-regulatory region sequence-specific DNA binding|regulation of transcription by RNA polymerase II
CSS0001636	-0.115186	0.711415	Down	CGS1	Cystathionine gamma-synthase 1, chloroplastic	GO:0009507,GO:0009570,GO:0003962,GO:0102028,GO:0030170,GO:0009086,GO:0001887,GO:0019346	chloroplast|chloroplast stroma|cystathionine gamma-synthase activity|cystathionine gamma-synthase activity (acts on O-phosphohomoserine)|pyridoxal phosphate binding|methionine biosynthetic process|selenium compound metabolic process|transsulfuration	ko00920,ko00270,ko00450	Sulfur metabolism|Cysteine and methionine metabolism|Selenocompound metabolism
CSS0001637	5.30312	0.000545234	Up
CSS0001638	5.19735	0.00026649	Up	At4g23740	Probable inactive receptor kinase At4g23740	GO:0016020,GO:0005524,GO:0004672,GO:0006468	membrane|ATP binding|protein kinase activity|protein phosphorylation
CSS0001639	-1.31288	0.140556	Down	RPM1	Disease resistance protein RPM1	GO:0012505,GO:0031234,GO:0005886,GO:0043531,GO:0005524,GO:0000166,GO:0009626	endomembrane system|extrinsic component of cytoplasmic side of plasma membrane|plasma membrane|ADP binding|ATP binding|nucleotide binding|plant-type hypersensitive response	ko04626	Plant-pathogen interaction
CSS0001640	-0.336891	0.242332	Down	PDC4	Pyruvate decarboxylase 4	GO:0005829,GO:0016831,GO:0000287,GO:0004737,GO:0030976	cytosol|carboxy-lyase activity|magnesium ion binding|pyruvate decarboxylase activity|thiamine pyrophosphate binding	ko00010	Glycolysis / Gluconeogenesis
CSS0001641	-0.136435	0.497038	Down	RPS15	40S ribosomal protein S15	GO:0022627,GO:0003723,GO:0003735,GO:0000028,GO:0006412	cytosolic small ribosomal subunit|RNA binding|structural constituent of ribosome|ribosomal small subunit assembly|translation	ko03010	Ribosome
CSS0001643	-0.239432	0.310355	Down	At3g06240	F-box/kelch-repeat protein At3g06240
CSS0001645	-2.64519	0.215549	Down
CSS0001646	-0.116876	0.613164	Down	UBP14	Ubiquitin carboxyl-terminal hydrolase 14	GO:0005829,GO:0005634,GO:0004843,GO:0004197,GO:1990450,GO:0061815,GO:0008270,GO:0009734,GO:0071370,GO:0009793,GO:0009965,GO:0016579,GO:0042127,GO:0048767,GO:0006511	cytosol|nucleus|cysteine-type deubiquitinase activity|cysteine-type endopeptidase activity|linear polyubiquitin binding|Met1-linked polyubiquitin deubiquitinase activity|zinc ion binding|auxin-activated signaling pathway|cellular response to gibberellin stimulus|embryo development ending in seed dormancy|leaf morphogenesis|protein deubiquitination|regulation of cell population proliferation|root …
CSS0001648	-1.50362	0.134473	Down	CXE16	Probable carboxylesterase 16	GO:0106435	carboxylesterase activity
CSS0001651	-0.360473	0.262852	Down	ICP55	Intermediate cleaving peptidase 55, mitochondrial	GO:0005739,GO:0005634,GO:0004177,GO:0030145,GO:0070006,GO:0008233,GO:0050821,GO:0006508	mitochondrion|nucleus|aminopeptidase activity|manganese ion binding|metalloaminopeptidase activity|peptidase activity|protein stabilization|proteolysis
CSS0001652	0.491465	0.562651	Up
CSS0001654	-0.269522	0.214007	Down	RFC2	Replication factor C subunit 2	GO:0005663,GO:0005634,GO:0005524,GO:0016887,GO:0003677,GO:0006281,GO:0006261	DNA replication factor C complex|nucleus|ATP binding|ATP hydrolysis activity|DNA binding|DNA repair|DNA-templated DNA replication	ko03030,ko03410,ko03420,ko03430	DNA replication|Base excision repair|Nucleotide excision repair|Mismatch repair
CSS0001656	1.10132	0.000901986	Up
CSS0001658	1.37718	0.124407	Up	WLIM1	LIM domain-containing protein WLIM1	GO:0005737,GO:0005856,GO:0005886,GO:0051015,GO:0046872,GO:0003729,GO:0051017	cytoplasm|cytoskeleton|plasma membrane|actin filament binding|metal ion binding|mRNA binding|actin filament bundle assembly
CSS0001659	-0.389117	0.662698	Down	CSLD3	Cellulose synthase-like protein D3	GO:0005783,GO:0005768,GO:0005794,GO:0000139,GO:0005886,GO:0005802,GO:0016760,GO:0051753,GO:0071555,GO:0030244,GO:0009833,GO:0009409	endoplasmic reticulum|endosome|Golgi apparatus|Golgi membrane|plasma membrane|trans-Golgi network|cellulose synthase (UDP-forming) activity|mannan synthase activity|cell wall organization|cellulose biosynthetic process|plant-type primary cell wall biogenesis|response to cold
CSS0001662	0.523586	0.483514	Up
CSS0001663	1.18574	5.24131e-05	Up	PDH-E1	Pyruvate dehydrogenase E1 component subunit alpha-3, chloroplastic	GO:0009507,GO:0009941,GO:0009570,GO:0009536,GO:0004739,GO:0006086,GO:0006096	chloroplast|chloroplast envelope|chloroplast stroma|plastid|pyruvate dehydrogenase (acetyl-transferring) activity|acetyl-CoA biosynthetic process from pyruvate|glycolytic process	ko00010,ko00020,ko00620,ko00785	Glycolysis / Gluconeogenesis|Citrate cycle (TCA cycle)|Pyruvate metabolism|Lipoic acid metabolism
CSS0001666	-0.651436	0.193938	Down	CPN60-2	Chaperonin CPN60-2, mitochondrial	GO:0005739,GO:0005524,GO:0140662,GO:0042026	mitochondrion|ATP binding|ATP-dependent protein folding chaperone|protein refolding	ko03018	RNA degradation
CSS0001667	-0.347074	0.33193	Down	COQ5	2-methoxy-6-polyprenyl-1,4-benzoquinol methylase, mitochondrial	GO:0031314,GO:0005739,GO:0043429,GO:0043333,GO:0008168,GO:0032259,GO:0006744	extrinsic component of mitochondrial inner membrane|mitochondrion|2-nonaprenyl-6-methoxy-1,4-benzoquinone methyltransferase activity|2-octaprenyl-6-methoxy-1,4-benzoquinone methylase activity|methyltransferase activity|methylation|ubiquinone biosynthetic process	ko00130	Ubiquinone and other terpenoid-quinone biosynthesis
CSS0001669	0.137158	0.610256	Up	CALS11	Callose synthase 11	GO:0000148,GO:0005886,GO:0003843,GO:0046527,GO:0006075,GO:0071555,GO:0007623,GO:0009555,GO:0008360,GO:0000003	1,3-beta-D-glucan synthase complex|plasma membrane|1,3-beta-D-glucan synthase activity|glucosyltransferase activity|(1->3)-beta-D-glucan biosynthetic process|cell wall organization|circadian rhythm|pollen development|regulation of cell shape|reproduction
CSS0001670	0.143192	0.81182	Up	MIK2	MDIS1-interacting receptor like kinase 2	GO:0005886,GO:0009506,GO:0090406,GO:0005524,GO:0042277,GO:0001653,GO:0106310,GO:0004674,GO:1901653,GO:0002213,GO:0009755,GO:0009759,GO:0009695,GO:0010183,GO:0031349,GO:0006468,GO:0080027,GO:0002237	plasma membrane|plasmodesma|pollen tube|ATP binding|peptide binding|peptide receptor activity|protein serine kinase activity|protein serine/threonine kinase activity|cellular response to peptide|defense response to insect|hormone-mediated signaling pathway|indole glucosinolate biosynthetic process|jasmonic acid biosynthetic process|pollen tube guidance|positive regulation of defense response|prot…
CSS0001674	1.86478	0.112432	Up	OCT3	Organic cation/carnitine transporter 3	GO:0009705,GO:0005524,GO:0022857,GO:0070417,GO:0006811	plant-type vacuole membrane|ATP binding|transmembrane transporter activity|cellular response to cold|ion transport
CSS0001675	-1.15836	0.0637709	Down	NUDT2	Nudix hydrolase 2	GO:0005829,GO:0047631,GO:0046872,GO:0051287,GO:0000210,GO:0035529,GO:0006979	cytosol|ADP-ribose diphosphatase activity|metal ion binding|NAD binding|NAD+ diphosphatase activity|NADH pyrophosphatase activity|response to oxidative stress	ko00230,ko00760	Purine metabolism|Nicotinate and nicotinamide metabolism
CSS0001676	0.324486	0.706063	Up	At1g12700	Putative pentatricopeptide repeat-containing protein At1g12700, mitochondrial	GO:0005739,GO:0090617,GO:0080156	mitochondrion|mitochondrial mRNA 5'-end processing|mitochondrial mRNA modification
CSS0001679	1.13198	0.0627926	Up
CSS0001683	0.502586	0.620175	Up
CSS0001684	-1.29986	0.115203	Down	XYL2	Putative alpha-xylosidase 2	GO:0048046,GO:0005829,GO:0009506,GO:0061634,GO:0030246,GO:0004553,GO:0071555,GO:0000272	apoplast|cytosol|plasmodesma|alpha-D-xyloside xylohydrolase|carbohydrate binding|hydrolase activity, hydrolyzing O-glycosyl compounds|cell wall organization|polysaccharide catabolic process
CSS0001685	0.742637	0.499545	Up	At3g03980	NADPH-dependent aldehyde reductase-like protein, chloroplastic	GO:0009507,GO:0016491	chloroplast|oxidoreductase activity	ko00061,ko00780	Fatty acid biosynthesis|Biotin metabolism
CSS0001688	1.09605	0.0149189	Up	At3g21620	CSC1-like protein At3g21620	GO:0005886,GO:0005227	plasma membrane|calcium activated cation channel activity
CSS0001689	9.09857	6.22239e-08	Up	IBH1	Transcription factor IBH1	GO:0009742,GO:0006355,GO:0009741,GO:0009826	brassinosteroid mediated signaling pathway|regulation of DNA-templated transcription|response to brassinosteroid|unidimensional cell growth
CSS0001690	0.369305	0.38465	Up
CSS0001691	0.493161	0.324469	Up	At1g79820	Probable plastidic glucose transporter 3	GO:0031969,GO:0005768,GO:0005794,GO:0016020,GO:0005802,GO:0015149,GO:0015749	chloroplast membrane|endosome|Golgi apparatus|membrane|trans-Golgi network|hexose transmembrane transporter activity|monosaccharide transmembrane transport
CSS0001693	-0.461472	0.292412	Down	At4g28920	UPF0725 protein At4g28920
CSS0001694	0.342517	0.394982	Up	At4g19070	Cadmium-induced protein AS8
CSS0001695	2.47717	0.00142562	Up	RPM1	Disease resistance protein RPM1	GO:0012505,GO:0031234,GO:0005886,GO:0043531,GO:0005524,GO:0000166,GO:0009626	endomembrane system|extrinsic component of cytoplasmic side of plasma membrane|plasma membrane|ADP binding|ATP binding|nucleotide binding|plant-type hypersensitive response	ko04626	Plant-pathogen interaction
CSS0001697	-0.154093	0.878253	Down
CSS0001698	-0.724992	0.340983	Down
CSS0001700	0.182651	0.961636	Up	COX6B-2	Cytochrome c oxidase subunit 6b-2	GO:0005739,GO:0009536,GO:0045277	mitochondrion|plastid|respiratory chain complex IV	ko00190	Oxidative phosphorylation
CSS0001701	-0.631017	0.269036	Down
CSS0001702	4.29844	6.30826e-10	Up	MAP65-8	65-kDa microtubule-associated protein 8	GO:0005737,GO:0005874,GO:0005634,GO:0009524,GO:0005819,GO:0000922,GO:0008017,GO:0007049,GO:0051301,GO:0000226	cytoplasm|microtubule|nucleus|phragmoplast|spindle|spindle pole|microtubule binding|cell cycle|cell division|microtubule cytoskeleton organization
CSS0001704	-0.340905	0.488457	Down		Remorin	GO:0005886,GO:0048032,GO:0007267	plasma membrane|galacturonate binding|cell-cell signaling
CSS0001705	-3.01424	0.0811026	Down	FER	Receptor-like protein kinase FERONIA	GO:0043680,GO:0005886,GO:0009506,GO:0005524,GO:0004672,GO:0106310,GO:0004674,GO:0009738,GO:0009742,GO:0032922,GO:0050832,GO:0009873,GO:0009788,GO:0030308,GO:0010483,GO:0009791,GO:0046777,GO:0009741,GO:0009723,GO:0048364,GO:0010118	filiform apparatus|plasma membrane|plasmodesma|ATP binding|protein kinase activity|protein serine kinase activity|protein serine/threonine kinase activity|abscisic acid-activated signaling pathway|brassinosteroid mediated signaling pathway|circadian regulation of gene expression|defense response to fungus|ethylene-activated signaling pathway|negative regulation of abscisic acid-activated signalin…
CSS0001706	-0.119907	0.685458	Down	RPN6	26S proteasome non-ATPase regulatory subunit 11 homolog	GO:0005634,GO:0009506,GO:0000502,GO:0008541,GO:0005198,GO:0030163,GO:0006511	nucleus|plasmodesma|proteasome complex|proteasome regulatory particle, lid subcomplex|structural molecule activity|protein catabolic process|ubiquitin-dependent protein catabolic process	ko03050	Proteasome
CSS0001707	-22.9154	4.52191e-09	Down	At1g64890	Probable folate-biopterin transporter 7	GO:0016020	membrane
CSS0001708	0.88232	0.27749	Up	NRPB12	DNA-directed RNA polymerases II, IV and V subunit 12	GO:0005736,GO:0005665,GO:0005666,GO:0000418,GO:0003677,GO:0003899,GO:0008270,GO:0006351	RNA polymerase I complex|RNA polymerase II, core complex|RNA polymerase III complex|RNA polymerase IV complex|DNA binding|DNA-directed 5'-3' RNA polymerase activity|zinc ion binding|DNA-templated transcription	ko03020,ko03420	RNA polymerase|Nucleotide excision repair
CSS0001709	-0.226053	0.361107	Down	POLH	DNA polymerase eta	GO:0005634,GO:0005657,GO:0035861,GO:0003684,GO:0003887,GO:0046872,GO:0006260,GO:0042276,GO:0009314,GO:0010224,GO:0009650	nucleus|replication fork|site of double-strand break|damaged DNA binding|DNA-directed DNA polymerase activity|metal ion binding|DNA replication|error-prone translesion synthesis|response to radiation|response to UV-B|UV protection
CSS0001710	0.337622	0.0948115	Up	ADF2	Actin-depolymerizing factor 2	GO:0015629,GO:0003779,GO:0030042	actin cytoskeleton|actin binding|actin filament depolymerization
CSS0001711	-2.72016	0.385652	Down
CSS0001712	2.49279	0.000215164	Up	SHR	Protein SHORT-ROOT	GO:0005769,GO:0005770,GO:0005634,GO:0055037,GO:0003700,GO:0043565,GO:0000976,GO:0008356,GO:0055072,GO:0048366,GO:0045930,GO:0009956,GO:0006355,GO:0032350	early endosome|late endosome|nucleus|recycling endosome|DNA-binding transcription factor activity|sequence-specific DNA binding|transcription cis-regulatory region binding|asymmetric cell division|iron ion homeostasis|leaf development|negative regulation of mitotic cell cycle|radial pattern formation|regulation of DNA-templated transcription|regulation of hormone metabolic process
CSS0001715	0.780233	0.383281	Up	ARF2A	Auxin response factor 2A	GO:0005634,GO:0003677,GO:0046982,GO:0042803,GO:0009734,GO:0009835,GO:0009836,GO:0009911,GO:0006355	nucleus|DNA binding|protein heterodimerization activity|protein homodimerization activity|auxin-activated signaling pathway|fruit ripening|fruit ripening, climacteric|positive regulation of flower development|regulation of DNA-templated transcription
CSS0001718	0.101774	0.88583	Up
CSS0001719	0.741905	0.0341078	Up	PGI1	Glucose-6-phosphate isomerase 1, chloroplastic	GO:0009507,GO:0009941,GO:0009570,GO:0005829,GO:0009536,GO:0097367,GO:0004347,GO:0048029,GO:0006094,GO:0051156,GO:0006096,GO:0009911,GO:0005982	chloroplast|chloroplast envelope|chloroplast stroma|cytosol|plastid|carbohydrate derivative binding|glucose-6-phosphate isomerase activity|monosaccharide binding|gluconeogenesis|glucose 6-phosphate metabolic process|glycolytic process|positive regulation of flower development|starch metabolic process
CSS0001720	-0.384995	0.125097	Down
CSS0001721	-0.821149	0.150503	Down	Os01g0794400	Probable nucleoredoxin 2	GO:0047134	protein-disulfide reductase (NAD(P)) activity
CSS0001723	-0.649481	0.407886	Down
CSS0001724	0.410012	0.863206	Up	At1g60180	Probable F-box protein At1g60180
CSS0001725	0.641844	0.0890229	Up	AMT3-1	Ammonium transporter 3 member 1	GO:0005886,GO:0008519,GO:0072488	plasma membrane|ammonium transmembrane transporter activity|ammonium transmembrane transport
CSS0001726	1.05528	0.0185808	Up	WRKY7	Probable WRKY transcription factor 7	GO:0005634,GO:0005516,GO:0003700,GO:0000976	nucleus|calmodulin binding|DNA-binding transcription factor activity|transcription cis-regulatory region binding
CSS0001727	0.69841	0.517823	Up	ARF5	Auxin response factor 5	GO:0005634,GO:0003700,GO:0042802,GO:0000976,GO:0009734,GO:0009793,GO:0009908,GO:0010305,GO:0009942,GO:0048507,GO:0006355,GO:0009733,GO:0048364,GO:0010051	nucleus|DNA-binding transcription factor activity|identical protein binding|transcription cis-regulatory region binding|auxin-activated signaling pathway|embryo development ending in seed dormancy|flower development|leaf vascular tissue pattern formation|longitudinal axis specification|meristem development|regulation of DNA-templated transcription|response to auxin|root development|xylem and phlo…	ko04075	Plant hormone signal transduction
CSS0001731	-0.742353	0.0412822	Down
CSS0001732	0.321198	0.538037	Up	lpxC	UDP-3-O-acyl-N-acetylglucosamine deacetylase	GO:0009507,GO:0046872,GO:0008759,GO:0103117,GO:0009245,GO:2001289	chloroplast|metal ion binding|UDP-3-O-[3-hydroxymyristoyl] N-acetylglucosamine deacetylase activity|UDP-3-O-acyl-N-acetylglucosamine deacetylase activity|lipid A biosynthetic process|lipid X metabolic process
CSS0001733	-1.43559	0.496283	Down
CSS0001735	0.82505	0.643198	Up	RPN9A	26S proteasome non-ATPase regulatory subunit 13 homolog A	GO:0005829,GO:0005634,GO:0000502,GO:0008541,GO:0005198,GO:0006511	cytosol|nucleus|proteasome complex|proteasome regulatory particle, lid subcomplex|structural molecule activity|ubiquitin-dependent protein catabolic process	ko03050	Proteasome
CSS0001738	-0.370915	0.138879	Down
CSS0001739	-0.072333	0.833567	Down	SIA1	Sialyltransferase-like protein 1	GO:0005768,GO:0005794,GO:0000139,GO:0000138,GO:0005802,GO:0008373,GO:0009846,GO:0009860,GO:0006486	endosome|Golgi apparatus|Golgi membrane|Golgi trans cisterna|trans-Golgi network|sialyltransferase activity|pollen germination|pollen tube growth|protein glycosylation
CSS0001740	0.310175	0.311981	Up	RPS14B	40S ribosomal protein S14-2	GO:0005829,GO:0022626,GO:0022627,GO:0005730,GO:0042788,GO:0048027,GO:0003729,GO:0070181,GO:0003735,GO:0000462,GO:0000028,GO:0006412	cytosol|cytosolic ribosome|cytosolic small ribosomal subunit|nucleolus|polysomal ribosome|mRNA 5'-UTR binding|mRNA binding|small ribosomal subunit rRNA binding|structural constituent of ribosome|maturation of SSU-rRNA from tricistronic rRNA transcript (SSU-rRNA, 5.8S rRNA, LSU-rRNA)|ribosomal small subunit assembly|translation	ko03010	Ribosome
CSS0001741	3.43283	0.00861134	Up	BOR1	Boron transporter 1	GO:0010008,GO:0005886,GO:0005774,GO:0046715,GO:0005452,GO:0022857,GO:0035445,GO:0080029,GO:0050801,GO:0010036,GO:0055085	endosome membrane|plasma membrane|vacuolar membrane|active borate transmembrane transporter activity|solute:inorganic anion antiporter activity|transmembrane transporter activity|borate transmembrane transport|cellular response to boron-containing substance levels|ion homeostasis|response to boron-containing substance|transmembrane transport
CSS0001742	-0.152659	0.620797	Down	RMA2	E3 ubiquitin-protein ligase RMA2	GO:0005783,GO:0005789,GO:0046872,GO:0061630,GO:0044390,GO:0004842,GO:0071712,GO:0006511	endoplasmic reticulum|endoplasmic reticulum membrane|metal ion binding|ubiquitin protein ligase activity|ubiquitin-like protein conjugating enzyme binding|ubiquitin-protein transferase activity|ER-associated misfolded protein catabolic process|ubiquitin-dependent protein catabolic process
CSS0001743	-0.419279	0.100315	Down	RPN1A	26S proteasome non-ATPase regulatory subunit 2 homolog A	GO:0005737,GO:0005829,GO:0005739,GO:0005634,GO:0009506,GO:0000502,GO:0008540,GO:0034515,GO:0030234,GO:0043130,GO:0045087,GO:0043161,GO:0030163,GO:0051726,GO:0042176,GO:0009751	cytoplasm|cytosol|mitochondrion|nucleus|plasmodesma|proteasome complex|proteasome regulatory particle, base subcomplex|proteasome storage granule|enzyme regulator activity|ubiquitin binding|innate immune response|proteasome-mediated ubiquitin-dependent protein catabolic process|protein catabolic process|regulation of cell cycle|regulation of protein catabolic process|response to salicylic acid	ko03050	Proteasome
CSS0001744	-0.0768548	0.874732	Down	TCP5	Transcription factor TCP5	GO:0005634,GO:0003700,GO:0043565,GO:0048366,GO:0009965,GO:0010150,GO:0006355,GO:0009408	nucleus|DNA-binding transcription factor activity|sequence-specific DNA binding|leaf development|leaf morphogenesis|leaf senescence|regulation of DNA-templated transcription|response to heat
CSS0001745	0.301601	0.619425	Up	MRL7L	Thioredoxin-like fold domain-containing protein MRL7L, chloroplastic	GO:0009570,GO:0005634,GO:0009658,GO:0006355	chloroplast stroma|nucleus|chloroplast organization|regulation of DNA-templated transcription
CSS0001746	-0.560586	0.601512	Down	NEN4	Protein NEN4	GO:0005634,GO:0008408,GO:0046872,GO:0003676	nucleus|3'-5' exonuclease activity|metal ion binding|nucleic acid binding
CSS0001747	-0.84239	0.120871	Down	STA	Sugar carrier protein A	GO:0016020,GO:0015145,GO:0015293	membrane|monosaccharide transmembrane transporter activity|symporter activity
CSS0001748	-3.25838	0.00116718	Down	NRT2.7	High affinity nitrate transporter 2.7	GO:0009705,GO:0005886,GO:0015112,GO:0071249,GO:0042128,GO:0015706	plant-type vacuole membrane|plasma membrane|nitrate transmembrane transporter activity|cellular response to nitrate|nitrate assimilation|nitrate transmembrane transport	ko00910	Nitrogen metabolism
CSS0001749	0.98391	0.101054	Up
CSS0001750	-1.37257	0.0957696	Down
CSS0001752	1.47441	0.0173673	Up	RCOM_1506700	Probable aspartyl aminopeptidase	GO:0005737,GO:0004177,GO:0008237,GO:0008270,GO:0006508	cytoplasm|aminopeptidase activity|metallopeptidase activity|zinc ion binding|proteolysis
CSS0001753	-1.78913	0.00350911	Down	ABCC3	ABC transporter C family member 3	GO:0048046,GO:0016020,GO:0000325,GO:0009506,GO:0005774,GO:0005773,GO:0015431,GO:0008559,GO:0005524,GO:0016887,GO:0042626,GO:0010290,GO:0055085	apoplast|membrane|plant-type vacuole|plasmodesma|vacuolar membrane|vacuole|ABC-type glutathione S-conjugate transporter activity|ABC-type xenobiotic transporter activity|ATP binding|ATP hydrolysis activity|ATPase-coupled transmembrane transporter activity|chlorophyll catabolite transmembrane transporter activity|transmembrane transport
CSS0001754	-0.723406	0.0347845	Down	NADK2	NAD kinase 2, chloroplastic	GO:0009507,GO:0005524,GO:0005516,GO:0003951,GO:0019674,GO:0006741,GO:0016310	chloroplast|ATP binding|calmodulin binding|NAD+ kinase activity|NAD metabolic process|NADP biosynthetic process|phosphorylation	ko00760	Nicotinate and nicotinamide metabolism
CSS0001755	0.00686679	0.988075	Up
CSS0001758	-0.255005	0.250949	Down	LIF2	Heterogeneous nuclear ribonucleoprotein Q	GO:0005737,GO:0005783,GO:0005634,GO:0003682,GO:0003730,GO:0003729,GO:0043565,GO:0071395,GO:0042742,GO:0050832,GO:0045087,GO:0045824,GO:0045893,GO:1905933,GO:0009909,GO:0010468,GO:0010439,GO:1902464,GO:0009617	cytoplasm|endoplasmic reticulum|nucleus|chromatin binding|mRNA 3'-UTR binding|mRNA binding|sequence-specific DNA binding|cellular response to jasmonic acid stimulus|defense response to bacterium|defense response to fungus|innate immune response|negative regulation of innate immune response|positive regulation of DNA-templated transcription|regulation of cell fate determination|regulation of flowe…
CSS0001759	0.282542	0.346643	Up	OVA6	Proline--tRNA ligase, chloroplastic/mitochondrial	GO:0017101,GO:0009507,GO:0009570,GO:0005737,GO:0005739,GO:0005524,GO:0004827,GO:0009553,GO:0048481,GO:0006433,GO:0010109,GO:0048316	aminoacyl-tRNA synthetase multienzyme complex|chloroplast|chloroplast stroma|cytoplasm|mitochondrion|ATP binding|proline-tRNA ligase activity|embryo sac development|plant ovule development|prolyl-tRNA aminoacylation|regulation of photosynthesis|seed development	ko00970	Aminoacyl-tRNA biosynthesis
CSS0001760	-2.20133	0.00178927	Down	NFD4	Protein NUCLEAR FUSION DEFECTIVE 4	GO:0016020,GO:0005739,GO:0000741,GO:0010197,GO:0009651	membrane|mitochondrion|karyogamy|polar nucleus fusion|response to salt stress
CSS0001762	0.0160668	0.973745	Up	PMRT15	Protein arginine N-methyltransferase 1.5	GO:0005829,GO:0005634,GO:0008469,GO:0008276,GO:0035242,GO:0006325,GO:0034969,GO:0043985,GO:0035246,GO:0010220,GO:0006355,GO:0009909	cytosol|nucleus|histone arginine N-methyltransferase activity|protein methyltransferase activity|protein-arginine omega-N asymmetric methyltransferase activity|chromatin organization|histone arginine methylation|histone H4-R3 methylation|peptidyl-arginine N-methylation|positive regulation of vernalization response|regulation of DNA-templated transcription|regulation of flower development
CSS0001763	6.58951	0.0791698	Up	H6H	Hyoscyamine 6-dioxygenase	GO:0047998,GO:0031418,GO:0046872,GO:0009805,GO:0002238	hyoscyamine (6S)-dioxygenase activity|L-ascorbic acid binding|metal ion binding|coumarin biosynthetic process|response to molecule of fungal origin
CSS0001764	0.778294	0.0216081	Up	PCMP-H12	Pentatricopeptide repeat-containing protein At1g08070, chloroplastic	GO:0009507,GO:0003723,GO:0008270,GO:0031425,GO:0006397,GO:0009451	chloroplast|RNA binding|zinc ion binding|chloroplast RNA processing|mRNA processing|RNA modification
CSS0001766	-2.34777	0.344476	Down	ANR1	MADS-box transcription factor ANR1	GO:0005634,GO:0003700,GO:0000981,GO:0046983,GO:0000978,GO:0000976,GO:0071249,GO:0048527,GO:0045944,GO:0006357,GO:0010167,GO:0007584	nucleus|DNA-binding transcription factor activity|DNA-binding transcription factor activity, RNA polymerase II-specific|protein dimerization activity|RNA polymerase II cis-regulatory region sequence-specific DNA binding|transcription cis-regulatory region binding|cellular response to nitrate|lateral root development|positive regulation of transcription by RNA polymerase II|regulation of transcrip…
CSS0001767	0.309575	0.163129	Up					ko00220	Arginine biosynthesis
CSS0001770	0.695434	0.139504	Up
CSS0001772	-2.11162	0.00507866	Down		Kirola	GO:0002253,GO:0006952	activation of immune response|defense response
CSS0001774	2.33403	0.0246599	Up	WRI1	Ethylene-responsive transcription factor WRI1	GO:0005634,GO:0003677,GO:0003700,GO:0019900,GO:0009873,GO:0008610,GO:0006629,GO:1901959,GO:0006109,GO:0006110,GO:0009744,GO:0019432	nucleus|DNA binding|DNA-binding transcription factor activity|kinase binding|ethylene-activated signaling pathway|lipid biosynthetic process|lipid metabolic process|positive regulation of cutin biosynthetic process|regulation of carbohydrate metabolic process|regulation of glycolytic process|response to sucrose|triglyceride biosynthetic process
CSS0001776	0.126367	0.893714	Up
CSS0001777	-2.86463	0.00197462	Down	CID12	Polyadenylate-binding protein-interacting protein 12	GO:0005634,GO:0003729,GO:0000166,GO:0003723	nucleus|mRNA binding|nucleotide binding|RNA binding
CSS0001778	-0.598639	0.0331182	Down	SSRP1	FACT complex subunit SSRP1	GO:0005694,GO:0005634,GO:0003677,GO:0016043,GO:0006281,GO:0006260	chromosome|nucleus|DNA binding|cellular component organization|DNA repair|DNA replication
CSS0001779	0.483266	0.13987	Up		Peptide-N4-(N-acetyl-beta-glucosaminyl)asparagine amidase A	GO:0000224	peptide-N4-(N-acetyl-beta-glucosaminyl)asparagine amidase activity
CSS0001780	1.83873	9.96533e-17	Up	At4g34480	Glucan endo-1,3-beta-glucosidase 7	GO:0005576,GO:0005886,GO:0042973,GO:0005975,GO:0071555	extracellular region|plasma membrane|glucan endo-1,3-beta-D-glucosidase activity|carbohydrate metabolic process|cell wall organization
CSS0001782	1.1626	0.679576	Up	D6PKL3	Serine/threonine-protein kinase D6PKL3	GO:0005737,GO:0005634,GO:0005886,GO:0005524,GO:0016301,GO:0004672,GO:0106310,GO:0004674,GO:0009734,GO:0010540,GO:0009638,GO:0062075,GO:0009555,GO:0006468	cytoplasm|nucleus|plasma membrane|ATP binding|kinase activity|protein kinase activity|protein serine kinase activity|protein serine/threonine kinase activity|auxin-activated signaling pathway|basipetal auxin transport|phototropism|pollen aperture formation|pollen development|protein phosphorylation
CSS0001783	0.463295	0.318721	Up	At1g77220	Protein LAZ1 homolog 1	GO:0016020,GO:0009705,GO:1900458,GO:0007033,GO:0098876	membrane|plant-type vacuole membrane|negative regulation of brassinosteroid mediated signaling pathway|vacuole organization|vesicle-mediated transport to the plasma membrane
CSS0001785	-1.69912	0.466751	Down
CSS0001786	-0.072098	0.895636	Down	RH17	DEAD-box ATP-dependent RNA helicase 17	GO:0005634,GO:0005524,GO:0016887,GO:0003723,GO:0003724,GO:0009651,GO:0042254	nucleus|ATP binding|ATP hydrolysis activity|RNA binding|RNA helicase activity|response to salt stress|ribosome biogenesis
CSS0001789	-0.253929	0.8035	Down	AMP1	Probable glutamate carboxypeptidase AMP1	GO:0005789,GO:0016020,GO:0004180,GO:0046872,GO:0004181,GO:0009793,GO:0009908,GO:0010305,GO:0048507,GO:0009640,GO:0006508,GO:0010080,GO:0010081,GO:0010082,GO:0048364	endoplasmic reticulum membrane|membrane|carboxypeptidase activity|metal ion binding|metallocarboxypeptidase activity|embryo development ending in seed dormancy|flower development|leaf vascular tissue pattern formation|meristem development|photomorphogenesis|proteolysis|regulation of floral meristem growth|regulation of inflorescence meristem growth|regulation of root meristem growth|root developm…
CSS0001790	-0.66053	0.124048	Down	SDR1	(+)-neomenthol dehydrogenase	GO:0005737,GO:0047501,GO:0006952	cytoplasm|(+)-neomenthol dehydrogenase activity|defense response	ko00902	Monoterpenoid biosynthesis
CSS0001793	-0.607312	0.550916	Down	CYP714A1	Cytochrome P450 714A1	GO:0005789,GO:0020037,GO:0005506,GO:0004497,GO:0016705	endoplasmic reticulum membrane|heme binding|iron ion binding|monooxygenase activity|oxidoreductase activity, acting on paired donors, with incorporation or reduction of molecular oxygen
CSS0001794	2.25824	5.22837e-06	Up	RPS5	Disease resistance protein RPS5	GO:0005886,GO:0043531,GO:0005524,GO:0042802,GO:0000166,GO:0038023,GO:0008219,GO:0006952,GO:0042742,GO:0009626	plasma membrane|ADP binding|ATP binding|identical protein binding|nucleotide binding|signaling receptor activity|cell death|defense response|defense response to bacterium|plant-type hypersensitive response
CSS0001795	-0.840343	0.0236962	Down					ko00500,ko00230,ko00240,ko00740,ko00760,ko00770	Starch and sucrose metabolism|Purine metabolism|Pyrimidine metabolism|Riboflavin metabolism|Nicotinate and nicotinamide metabolism|Pantothenate and CoA biosynthesis
CSS0001796	-1.55526	0.0220368	Down	At5g01610	Uncharacterized protein At5g01610
CSS0001798	-0.545942	0.0305346	Down	ATJ6	Chaperone protein dnaJ 6	GO:0005634	nucleus
CSS0001800	-0.414948	0.0932174	Down
CSS0001803	5.43955	0.164911	Up	ALE2	Receptor-like serine/threonine-protein kinase ALE2	GO:0005886,GO:0005524,GO:0016301,GO:0106310,GO:0004674,GO:0030154,GO:0090558,GO:1905393,GO:0046777,GO:0010068	plasma membrane|ATP binding|kinase activity|protein serine kinase activity|protein serine/threonine kinase activity|cell differentiation|plant epidermis development|plant organ formation|protein autophosphorylation|protoderm histogenesis
CSS0001805	0.181965	0.721624	Up	PCMP-H52	Putative pentatricopeptide repeat-containing protein At3g11460, mitochondrial	GO:0043231,GO:0005739,GO:0003723,GO:0008270,GO:0016554,GO:0006397,GO:0009451	intracellular membrane-bounded organelle|mitochondrion|RNA binding|zinc ion binding|cytidine to uridine editing|mRNA processing|RNA modification
CSS0001806	-2.75387	6.97225e-09	Down	GSVIVT00013502001	CASP-like protein 2B1	GO:0005886	plasma membrane
CSS0001808	-0.0512454	0.924845	Down	At5g63930	Probable leucine-rich repeat receptor-like protein kinase At5g63930	GO:0005886,GO:0005524,GO:0106310,GO:0004674,GO:0006468	plasma membrane|ATP binding|protein serine kinase activity|protein serine/threonine kinase activity|protein phosphorylation
CSS0001809	-2.76769	0.170712	Down	CHX18	Cation/H(+) antiporter 18	GO:0012505,GO:0005770,GO:0016020,GO:0015299,GO:0006813,GO:0006885	endomembrane system|late endosome|membrane|solute:proton antiporter activity|potassium ion transport|regulation of pH
CSS0001810	-0.43996	0.195225	Down	At1g74320	Probable choline kinase 2	GO:0005737,GO:0005524,GO:0004103,GO:0004305,GO:0006656,GO:0006646,GO:0016310	cytoplasm|ATP binding|choline kinase activity|ethanolamine kinase activity|phosphatidylcholine biosynthetic process|phosphatidylethanolamine biosynthetic process|phosphorylation	ko00564	Glycerophospholipid metabolism
CSS0001813	4.24603	0.0150964	Up	DPB3-1	DNA polymerase II subunit B3-1	GO:0005634,GO:0003700,GO:0046982,GO:0000976,GO:0045893,GO:0006355,GO:0009408,GO:0009414	nucleus|DNA-binding transcription factor activity|protein heterodimerization activity|transcription cis-regulatory region binding|positive regulation of DNA-templated transcription|regulation of DNA-templated transcription|response to heat|response to water deprivation
CSS0001815	-0.0354595	0.958132	Down	ASK8	Shaggy-related protein kinase theta	GO:0005737,GO:0005634,GO:0005524,GO:0016301,GO:0106310,GO:0004674,GO:0046777,GO:0009741,GO:0007165	cytoplasm|nucleus|ATP binding|kinase activity|protein serine kinase activity|protein serine/threonine kinase activity|protein autophosphorylation|response to brassinosteroid|signal transduction
CSS0001817	0.127858	0.936951	Up	ZAT5	Zinc finger protein ZAT5	GO:0005634,GO:0003700,GO:0046872,GO:0000976,GO:0006355	nucleus|DNA-binding transcription factor activity|metal ion binding|transcription cis-regulatory region binding|regulation of DNA-templated transcription
CSS0001819	-0.267039	0.509582	Down	APUM7	Putative pumilio homolog 7, chloroplastic	GO:0009507,GO:0005737,GO:0003729,GO:0010608,GO:0006417	chloroplast|cytoplasm|mRNA binding|post-transcriptional regulation of gene expression|regulation of translation
CSS0001823	2.53162	1.93766e-06	Up	SMT1	Cycloartenol-C-24-methyltransferase	GO:0005783,GO:0000325,GO:0009506,GO:0009536,GO:0003838,GO:0009793,GO:0032259,GO:0016126	endoplasmic reticulum|plant-type vacuole|plasmodesma|plastid|sterol 24-C-methyltransferase activity|embryo development ending in seed dormancy|methylation|sterol biosynthetic process	ko00100	Steroid biosynthesis
CSS0001824	0.472164	0.285292	Up	RBG4	Glycine-rich RNA-binding protein 4, mitochondrial	GO:0005829,GO:0005615,GO:0005739,GO:0003690,GO:0035198,GO:0003723,GO:0003697,GO:0003727,GO:0035197,GO:0006858,GO:1990428,GO:1900864,GO:0050688,GO:0009409,GO:0006970,GO:0009651,GO:0009414,GO:0050658	cytosol|extracellular space|mitochondrion|double-stranded DNA binding|miRNA binding|RNA binding|single-stranded DNA binding|single-stranded RNA binding|siRNA binding|extracellular transport|miRNA transport|mitochondrial RNA modification|regulation of defense response to virus|response to cold|response to osmotic stress|response to salt stress|response to water deprivation|RNA transport
CSS0001825	1.01769	0.401032	Up		NOI-like protein			ko04626	Plant-pathogen interaction
CSS0001826	-0.190422	0.268683	Down					ko03013,ko03015	Nucleocytoplasmic transport|mRNA surveillance pathway
CSS0001828	1.24185	7.25767e-06	Up	RABC2A	Ras-related protein RABC2a	GO:0012505,GO:0005777,GO:0005886,GO:0005525,GO:0030742,GO:0003924,GO:0080115,GO:0006886	endomembrane system|peroxisome|plasma membrane|GTP binding|GTP-dependent protein binding|GTPase activity|myosin XI tail binding|intracellular protein transport
CSS0001832	-0.00894324	0.975266	Down	VPS41	Vacuolar protein sorting-associated protein 41 homolog	GO:0030897,GO:0005770,GO:0009267,GO:0034058,GO:0009630,GO:0016236,GO:0006623	HOPS complex|late endosome|cellular response to starvation|endosomal vesicle fusion|gravitropism|macroautophagy|protein targeting to vacuole	ko04148	Efferocytosis
CSS0001833	0.556694	0.311347	Up		14-3-3-like protein 16R	GO:0005737,GO:0007165	cytoplasm|signal transduction
CSS0001834	1.02051	0.00761393	Up	At4g19900	Uncharacterized protein At4g19900			ko00601,ko00603	Glycosphingolipid biosynthesis - lacto and neolacto series|Glycosphingolipid biosynthesis - globo and isoglobo series
CSS0001835	-0.704078	0.0103462	Down					ko00190	Oxidative phosphorylation
CSS0001839	-0.141246	0.663872	Down	At4g00755	F-box protein At4g00755
CSS0001840	2.33787	2.94355e-06	Up	IQD31	Protein IQ-DOMAIN 31	GO:0005875,GO:0005739,GO:0005635,GO:0005886,GO:0005516	microtubule associated complex|mitochondrion|nuclear envelope|plasma membrane|calmodulin binding
CSS0001841	-0.463193	0.222042	Down	PHOS32	Universal stress protein PHOS32	GO:0009507,GO:0009536,GO:0005524,GO:0002238	chloroplast|plastid|ATP binding|response to molecule of fungal origin
CSS0001843	3.61437	0.00221116	Up	MAKR6	Probable membrane-associated kinase regulator 6	GO:0005886,GO:0009738	plasma membrane|abscisic acid-activated signaling pathway
CSS0001844	-1.35556	0.0366963	Down	CV	Protein CHLOROPLAST VESICULATION	GO:0009941,GO:0031969,GO:0009535,GO:0097708,GO:0005773,GO:1904821,GO:0010150,GO:0009735,GO:0006979,GO:1902074,GO:0009414	chloroplast envelope|chloroplast membrane|chloroplast thylakoid membrane|intracellular vesicle|vacuole|chloroplast disassembly|leaf senescence|response to cytokinin|response to oxidative stress|response to salt|response to water deprivation
CSS0001845	5.59435	8.89878e-05	Up	KIN8A	Kinesin-like protein KIN-8A	GO:0005871,GO:0005874,GO:0005524,GO:0016887,GO:0008017,GO:0003777,GO:0008574,GO:0007018	kinesin complex|microtubule|ATP binding|ATP hydrolysis activity|microtubule binding|microtubule motor activity|plus-end-directed microtubule motor activity|microtubule-based movement
CSS0001846	-0.477481	0.0730558	Down	PSL5	Probable glucan 1,3-alpha-glucosidase	GO:0005783,GO:0009536,GO:0090599,GO:0030246,GO:0033919,GO:0015926,GO:0004553,GO:0030244,GO:0042742,GO:0006491,GO:0009826	endoplasmic reticulum|plastid|alpha-glucosidase activity|carbohydrate binding|glucan 1,3-alpha-glucosidase activity|glucosidase activity|hydrolase activity, hydrolyzing O-glycosyl compounds|cellulose biosynthetic process|defense response to bacterium|N-glycan processing|unidimensional cell growth	ko00510,ko04141	N-Glycan biosynthesis|Protein processing in endoplasmic reticulum
CSS0001849	0.210808	0.76794	Up	ARS1	Protein ABA AND ROS SENSITIVE 1	GO:0005829,GO:0005634,GO:0005681,GO:0003676,GO:0008270,GO:0044773,GO:0033314,GO:0045892,GO:1903427,GO:0033260,GO:0010030,GO:0048838,GO:0048478,GO:0009737,GO:0042542,GO:0006979	cytosol|nucleus|spliceosomal complex|nucleic acid binding|zinc ion binding|mitotic DNA damage checkpoint signaling|mitotic DNA replication checkpoint signaling|negative regulation of DNA-templated transcription|negative regulation of reactive oxygen species biosynthetic process|nuclear DNA replication|positive regulation of seed germination|release of seed from dormancy|replication fork protectio…
CSS0001850	0.360187	0.24792	Up	BAK1	BRASSINOSTEROID INSENSITIVE 1-associated receptor kinase 1	GO:0010008,GO:0005886,GO:0005524,GO:0042802,GO:0106310,GO:0004674,GO:0033612,GO:0005102,GO:0004714,GO:0006952	endosome membrane|plasma membrane|ATP binding|identical protein binding|protein serine kinase activity|protein serine/threonine kinase activity|receptor serine/threonine kinase binding|signaling receptor binding|transmembrane receptor protein tyrosine kinase activity|defense response	ko04016,ko04075,ko04626	MAPK signaling pathway - plant|Plant hormone signal transduction|Plant-pathogen interaction
CSS0001852	-0.663497	0.0443491	Down	PAP	Plastid-lipid-associated protein, chloroplastic	GO:0009507	chloroplast
CSS0001853	1.97633	0.253413	Up	RPL19B	60S ribosomal protein L19-2	GO:0005829,GO:0022625,GO:0003729,GO:0003723,GO:0003735,GO:0006412	cytosol|cytosolic large ribosomal subunit|mRNA binding|RNA binding|structural constituent of ribosome|translation	ko03010	Ribosome
CSS0001854	-0.386377	0.165269	Down	LSMT-L	[Fructose-bisphosphate aldolase]-lysine N-methyltransferase, chloroplastic	GO:0009507,GO:0009570,GO:0030785,GO:0016279,GO:0018026,GO:0018023	chloroplast|chloroplast stroma|[ribulose-bisphosphate carboxylase]-lysine N-methyltransferase activity|protein-lysine N-methyltransferase activity|peptidyl-lysine monomethylation|peptidyl-lysine trimethylation
CSS0001857	0.634702	0.518851	Up
CSS0001858	1.51419	0.176215	Up
CSS0001860	-0.158681	0.562865	Down	At5g64030	Probable methyltransferase PMT26	GO:0005737,GO:0005768,GO:0005794,GO:0005797,GO:0000139,GO:0009536,GO:0005802,GO:0008168,GO:0032259	cytoplasm|endosome|Golgi apparatus|Golgi medial cisterna|Golgi membrane|plastid|trans-Golgi network|methyltransferase activity|methylation
CSS0001862	-0.399364	0.10926	Down	At1g13570	F-box/FBD/LRR-repeat protein At1g13570
CSS0001863	-0.307167	0.136753	Down	OsI_027940	Uncharacterized protein OsI_027940	GO:0051879,GO:0006950	Hsp90 protein binding|response to stress
CSS0001864	0.273416	0.35356	Up	PRR73	Two-component response regulator-like PRR73	GO:0005634,GO:0009736,GO:0000160,GO:0048511	nucleus|cytokinin-activated signaling pathway|phosphorelay signal transduction system|rhythmic process	ko04712	Circadian rhythm - plant
CSS0001866	8.41938	1.92735e-10	Up
CSS0001870	-2.21646	0.0112704	Down	HDA6	Histone deacetylase 6	GO:0009941,GO:0005730,GO:0005634,GO:0070822,GO:0004407,GO:0008270,GO:0006325,GO:0009793,GO:0016575,GO:0016441,GO:0048510,GO:0006357,GO:0009737,GO:0009651,GO:0010431,GO:0010228	chloroplast envelope|nucleolus|nucleus|Sin3-type complex|histone deacetylase activity|zinc ion binding|chromatin organization|embryo development ending in seed dormancy|histone deacetylation|post-transcriptional gene silencing|regulation of timing of transition from vegetative to reproductive phase|regulation of transcription by RNA polymerase II|response to abscisic acid|response to salt stress|…	ko03082,ko03083	ATP-dependent chromatin remodeling|Polycomb repressive complex
CSS0001871	-0.744559	0.0659924	Down	PP2A4	Serine/threonine-protein phosphatase PP2A-4 catalytic subunit	GO:0005737,GO:0005730,GO:0005634,GO:0000159,GO:0046872,GO:0017018,GO:0004722,GO:0006952,GO:0000082,GO:0006470	cytoplasm|nucleolus|nucleus|protein phosphatase type 2A complex|metal ion binding|myosin phosphatase activity|protein serine/threonine phosphatase activity|defense response|G1/S transition of mitotic cell cycle|protein dephosphorylation	ko03015,ko04136	mRNA surveillance pathway|Autophagy - other
CSS0001872	1.66126	0.00296449	Up	SHR	Protein SHORT-ROOT	GO:0005769,GO:0005770,GO:0005634,GO:0055037,GO:0003700,GO:0043565,GO:0000976,GO:0008356,GO:0055072,GO:0048366,GO:0045930,GO:0009956,GO:0006355,GO:0032350	early endosome|late endosome|nucleus|recycling endosome|DNA-binding transcription factor activity|sequence-specific DNA binding|transcription cis-regulatory region binding|asymmetric cell division|iron ion homeostasis|leaf development|negative regulation of mitotic cell cycle|radial pattern formation|regulation of DNA-templated transcription|regulation of hormone metabolic process
CSS0001873	-0.0446432	0.870854	Down
CSS0001875	-1.0993	0.0154309	Down
CSS0001877	1.47543	0.000687057	Up	TMK1	Receptor protein kinase TMK1	GO:0005576,GO:0005634,GO:0005886,GO:0005524,GO:0106310,GO:0004675,GO:0006468,GO:0007165	extracellular region|nucleus|plasma membrane|ATP binding|protein serine kinase activity|transmembrane receptor protein serine/threonine kinase activity|protein phosphorylation|signal transduction
CSS0001878	-3.40828	0.378684	Down	MPT3	Mitochondrial phosphate carrier protein 3, mitochondrial	GO:0005743,GO:0005739,GO:0009505,GO:0000325,GO:0005315,GO:0003729,GO:1990547,GO:0035435,GO:0009651	mitochondrial inner membrane|mitochondrion|plant-type cell wall|plant-type vacuole|inorganic phosphate transmembrane transporter activity|mRNA binding|mitochondrial phosphate ion transmembrane transport|phosphate ion transmembrane transport|response to salt stress
CSS0001882	-0.142993	0.744187	Down	At3g51130	PHAF1 protein At3g51130
CSS0001883	0.168101	0.720742	Up	PATROL1	Protein unc-13 homolog	GO:0005737,GO:0005886,GO:0009506,GO:0072659,GO:0010118	cytoplasm|plasma membrane|plasmodesma|protein localization to plasma membrane|stomatal movement
CSS0001884	5.73294	0.011329	Up	EPFL9	EPIDERMAL PATTERNING FACTOR-like protein 9	GO:0048046,GO:0019901,GO:0033612,GO:0005102,GO:0007267,GO:0010052,GO:2000123,GO:2000038,GO:0010374,GO:0010375	apoplast|protein kinase binding|receptor serine/threonine kinase binding|signaling receptor binding|cell-cell signaling|guard cell differentiation|positive regulation of stomatal complex development|regulation of stomatal complex development|stomatal complex development|stomatal complex patterning
CSS0001888	-1.19351	0.37723	Down	At4g27220	Probable disease resistance protein At4g27220	GO:0043531,GO:0005524,GO:0006952	ADP binding|ATP binding|defense response
CSS0001889	0.549102	0.241689	Up	GLK1	Transcription activator GLK1	GO:0005634,GO:0003700,GO:0000976,GO:1900056,GO:0045893	nucleus|DNA-binding transcription factor activity|transcription cis-regulatory region binding|negative regulation of leaf senescence|positive regulation of DNA-templated transcription
CSS0001890	0.667495	0.042207	Up	RPS17	30S ribosomal protein S17, chloroplastic	GO:0009507,GO:0009941,GO:0009570,GO:0009534,GO:0005739,GO:0000312,GO:0003729,GO:0019843,GO:0003735,GO:0032544	chloroplast|chloroplast envelope|chloroplast stroma|chloroplast thylakoid|mitochondrion|plastid small ribosomal subunit|mRNA binding|rRNA binding|structural constituent of ribosome|plastid translation	ko03010	Ribosome
CSS0001891	-0.424634	0.157412	Down	SYN2	Sister chromatid cohesion 1 protein 2	GO:0008278,GO:0005634,GO:0003682,GO:0051301,GO:0006302,GO:0000278,GO:1990414,GO:0007062	cohesin complex|nucleus|chromatin binding|cell division|double-strand break repair|mitotic cell cycle|replication-born double-strand break repair via sister chromatid exchange|sister chromatid cohesion
CSS0001892	3.23197	2.82721e-07	Up
CSS0001894	-0.368454	0.291423	Down	PLDZETA1	Phospholipase D zeta 1	GO:0031410,GO:0005886,GO:0070290,GO:0004630,GO:0048017,GO:0008610,GO:0006654,GO:0009395,GO:0048364	cytoplasmic vesicle|plasma membrane|N-acylphosphatidylethanolamine-specific phospholipase D activity|phospholipase D activity|inositol lipid-mediated signaling|lipid biosynthetic process|phosphatidic acid biosynthetic process|phospholipid catabolic process|root development	ko00564,ko00565,ko04144	Glycerophospholipid metabolism|Ether lipid metabolism|Endocytosis
CSS0001895	-0.523169	0.00582513	Down	CALS9	Callose synthase 9	GO:0000148,GO:0005829,GO:0005794,GO:0005886,GO:0003843,GO:0046527,GO:0006075,GO:0052543,GO:0048589,GO:0055047,GO:0009556,GO:0009555,GO:0009846,GO:0008360,GO:0080092	1,3-beta-D-glucan synthase complex|cytosol|Golgi apparatus|plasma membrane|1,3-beta-D-glucan synthase activity|glucosyltransferase activity|(1->3)-beta-D-glucan biosynthetic process|callose deposition in cell wall|developmental growth|generative cell mitosis|microsporogenesis|pollen development|pollen germination|regulation of cell shape|regulation of pollen tube growth
CSS0001896	-0.110272	0.642485	Down	TIC20-I	Protein TIC 20-I, chloroplastic	GO:0009706,GO:0008320,GO:0045037	chloroplast inner membrane|protein transmembrane transporter activity|protein import into chloroplast stroma
CSS0001897	1.49437	0.424834	Up
CSS0001898	1.67644	0.209071	Up	UGT73B6	Probable UDP-glucosyl transferase 73B6	GO:0008194	UDP-glycosyltransferase activity
CSS0001899	-0.466102	0.558761	Down
CSS0001900	0.66092	0.654271	Up		Caffeoyl-CoA O-methyltransferase	GO:0042409,GO:0046872,GO:0009809,GO:0032259	caffeoyl-CoA O-methyltransferase activity|metal ion binding|lignin biosynthetic process|methylation	ko00940,ko00945,ko00941	Phenylpropanoid biosynthesis|Stilbenoid, diarylheptanoid and gingerol biosynthesis|Flavonoid biosynthesis
CSS0001901	0.14284	0.647322	Up
CSS0001902	0.0902495	0.966476	Up
CSS0001904	-0.270609	0.669687	Down	ACS	Acetyl-coenzyme A synthetase, chloroplastic/glyoxysomal	GO:0009507,GO:0009570,GO:0005829,GO:0009514,GO:0009536,GO:0003987,GO:0016208,GO:0005524,GO:0006083,GO:0006085,GO:0019427,GO:0006631	chloroplast|chloroplast stroma|cytosol|glyoxysome|plastid|acetate-CoA ligase activity|AMP binding|ATP binding|acetate metabolic process|acetyl-CoA biosynthetic process|acetyl-CoA biosynthetic process from acetate|fatty acid metabolic process	ko00010,ko00620,ko00630,ko00640	Glycolysis / Gluconeogenesis|Pyruvate metabolism|Glyoxylate and dicarboxylate metabolism|Propanoate metabolism
CSS0001906	-0.534448	0.201274	Down	RPS3C	40S ribosomal protein S3-3	GO:0022626,GO:0022627,GO:0005730,GO:0005634,GO:0009506,GO:0009536,GO:0003729,GO:0003735,GO:0006412	cytosolic ribosome|cytosolic small ribosomal subunit|nucleolus|nucleus|plasmodesma|plastid|mRNA binding|structural constituent of ribosome|translation	ko03010	Ribosome
CSS0001909	-1.57439	0.000894917	Down	AIH	Agmatine deiminase	GO:0047632,GO:0004668,GO:0033388	agmatine deiminase activity|protein-arginine deiminase activity|putrescine biosynthetic process from arginine	ko00330	Arginine and proline metabolism
CSS0001911	-1.16593	0.409434	Down	ERF2	Ethylene-responsive transcription factor 2	GO:0005634,GO:0003700,GO:0000976,GO:0051301,GO:0009873,GO:0009864,GO:0010087,GO:0045893	nucleus|DNA-binding transcription factor activity|transcription cis-regulatory region binding|cell division|ethylene-activated signaling pathway|induced systemic resistance, jasmonic acid mediated signaling pathway|phloem or xylem histogenesis|positive regulation of DNA-templated transcription
CSS0001912	0.14858	0.895172	Up	CDC73	Protein CDC73 homolog	GO:0016593,GO:0005634,GO:0000993,GO:0009908,GO:0051568,GO:0009911,GO:0032968,GO:0034402,GO:0006368,GO:0010228	Cdc73/Paf1 complex|nucleus|RNA polymerase II complex binding|flower development|histone H3-K4 methylation|positive regulation of flower development|positive regulation of transcription elongation by RNA polymerase II|recruitment of 3'-end processing factors to RNA polymerase II holoenzyme complex|transcription elongation by RNA polymerase II promoter|vegetative to reproductive phase transition of…
CSS0001913	0.204081	0.734642	Up
CSS0001914	0.327669	0.396691	Up	SAP4	Zinc finger A20 and AN1 domain-containing stress-associated protein 4	GO:0003677,GO:0008270	DNA binding|zinc ion binding
CSS0001915	10.4552	3.16963e-05	Up	MYB16	Transcription factor MYB16	GO:0005634,GO:0003677,GO:0003700,GO:0000902,GO:0035017,GO:1901957	nucleus|DNA binding|DNA-binding transcription factor activity|cell morphogenesis|cuticle pattern formation|regulation of cutin biosynthetic process
CSS0001917	0.923787	0.00143345	Up
CSS0001919	-2.11633	0.0347266	Down	GH3.1	Probable indole-3-acetic acid-amido synthetase GH3.1	GO:0005737,GO:0016881,GO:0009733	cytoplasm|acid-amino acid ligase activity|response to auxin	ko04075	Plant hormone signal transduction
CSS0001920	0.0341037	0.937832	Up	KEA3	K(+) efflux antiporter 3, chloroplastic	GO:0009507,GO:0031969,GO:0009535,GO:0000139,GO:0016020,GO:0042651,GO:0015299,GO:0019722,GO:0009658,GO:0010196,GO:0009643,GO:1905157,GO:0006813,GO:1900069,GO:0010109,GO:0009644	chloroplast|chloroplast membrane|chloroplast thylakoid membrane|Golgi membrane|membrane|thylakoid membrane|solute:proton antiporter activity|calcium-mediated signaling|chloroplast organization|nonphotochemical quenching|photosynthetic acclimation|positive regulation of photosynthesis|potassium ion transport|regulation of cellular hyperosmotic salinity response|regulation of photosynthesis|respons…
CSS0001923	-0.275818	0.868698	Down	PIP2-5	Probable aquaporin PIP2-5	GO:0005886,GO:0015250,GO:0006833	plasma membrane|water channel activity|water transport
CSS0001924	-0.203234	0.417443	Down
CSS0001925	-0.029747	0.920237	Down	RBCMT	Ribulose-1,5 bisphosphate carboxylase/oxygenase large subunit N-methyltransferase, chloroplastic	GO:0009507,GO:0030785,GO:0016279,GO:0018026	chloroplast|[ribulose-bisphosphate carboxylase]-lysine N-methyltransferase activity|protein-lysine N-methyltransferase activity|peptidyl-lysine monomethylation
CSS0001926	0.0176498	0.937365	Up	SRL1	Pre-mRNA splicing factor SR-like 1	GO:0071011,GO:0006397,GO:0010226,GO:0009651,GO:0008380	precatalytic spliceosome|mRNA processing|response to lithium ion|response to salt stress|RNA splicing	ko03040	Spliceosome
CSS0001928	-0.467873	0.321764	Down	SPL1	Squamosa promoter-binding-like protein 1	GO:0005634,GO:0003677,GO:0003700,GO:0046872,GO:0006355	nucleus|DNA binding|DNA-binding transcription factor activity|metal ion binding|regulation of DNA-templated transcription
CSS0001929	-0.529252	0.451292	Down	SD16	Receptor-like serine/threonine-protein kinase SD1-6	GO:0005829,GO:0005886,GO:0005524,GO:0030246,GO:0004672,GO:0106310,GO:0004674,GO:0004675,GO:0031625,GO:0046777,GO:0006468,GO:0048544	cytosol|plasma membrane|ATP binding|carbohydrate binding|protein kinase activity|protein serine kinase activity|protein serine/threonine kinase activity|transmembrane receptor protein serine/threonine kinase activity|ubiquitin protein ligase binding|protein autophosphorylation|protein phosphorylation|recognition of pollen
CSS0001930	-0.403871	0.693754	Down	UGT73C3	UDP-glycosyltransferase 73C3	GO:0008194	UDP-glycosyltransferase activity	ko00908	Zeatin biosynthesis
CSS0001931	-2.11792	3.04658e-05	Down	CCT2	T-complex protein 1 subunit beta	GO:0005832,GO:0009505,GO:0009536,GO:0005524,GO:0016887,GO:0140662,GO:0051082,GO:0006457	chaperonin-containing T-complex|plant-type cell wall|plastid|ATP binding|ATP hydrolysis activity|ATP-dependent protein folding chaperone|unfolded protein binding|protein folding
CSS0001932	-4.4376	0.258992	Down	MYB124	Transcription factor MYB124	GO:0005634,GO:0003700,GO:0000981,GO:0000978,GO:0043565,GO:0000976,GO:0009926,GO:0009734,GO:0009553,GO:0010052,GO:0010235,GO:0010444,GO:0090436,GO:0009554,GO:0050891,GO:1901333,GO:1901002,GO:1902584,GO:0080022,GO:1902806,GO:0032875,GO:0006355,GO:2000037,GO:0009737,GO:0009733,GO:0009629,GO:0010376	nucleus|DNA-binding transcription factor activity|DNA-binding transcription factor activity, RNA polymerase II-specific|RNA polymerase II cis-regulatory region sequence-specific DNA binding|sequence-specific DNA binding|transcription cis-regulatory region binding|auxin polar transport|auxin-activated signaling pathway|embryo sac development|guard cell differentiation|guard mother cell cytokinesis…
CSS0001934	-0.185632	0.453347	Down	ATG1C	Serine/threonine-protein kinase ATG1c	GO:0005776,GO:0005737,GO:0031410,GO:0005524,GO:0004674,GO:1905037,GO:0018105,GO:0046777,GO:0015031	autophagosome|cytoplasm|cytoplasmic vesicle|ATP binding|protein serine/threonine kinase activity|autophagosome organization|peptidyl-serine phosphorylation|protein autophosphorylation|protein transport	ko04136	Autophagy - other
CSS0001936	-0.384607	0.46809	Down	PCMP-E22	Pentatricopeptide repeat-containing protein At2g02750	GO:0043231,GO:0003723,GO:0009451	intracellular membrane-bounded organelle|RNA binding|RNA modification
CSS0001937	0.307366	0.831635	Up
CSS0001938	-1.32395	0.534759	Down
CSS0001939	0.766781	0.473268	Up		Putative AC transposase	GO:0003677,GO:0046983,GO:0006310,GO:0032196	DNA binding|protein dimerization activity|DNA recombination|transposition
CSS0001940	-0.774297	0.111001	Down
CSS0001942	0.802677	0.304032	Up
CSS0001943	0.37799	0.588932	Up	PCMP-A5	Pentatricopeptide repeat-containing protein At3g26540	GO:0043231,GO:0003723,GO:0009451,GO:0010449	intracellular membrane-bounded organelle|RNA binding|RNA modification|root meristem growth
CSS0001944	0.402397	0.421106	Up
CSS0001945	-0.713396	0.308163	Down	PSKR2	Phytosulfokine receptor 2	GO:0009507,GO:0005886,GO:0005524,GO:0001653,GO:0106310,GO:0004674,GO:0006468	chloroplast|plasma membrane|ATP binding|peptide receptor activity|protein serine kinase activity|protein serine/threonine kinase activity|protein phosphorylation
CSS0001946	-0.318235	0.307685	Down	MTX1	Mitochondrial outer membrane import complex protein METAXIN	GO:0005737,GO:0005743,GO:0005741,GO:0005739,GO:0001401,GO:0006626	cytoplasm|mitochondrial inner membrane|mitochondrial outer membrane|mitochondrion|SAM complex|protein targeting to mitochondrion
CSS0001949	-0.126095	0.845436	Down	UGT85A24	7-deoxyloganetin glucosyltransferase	GO:0035251	UDP-glucosyltransferase activity
CSS0001950	-0.141088	0.61017	Down	UNG	Uracil-DNA glycosylase, mitochondrial	GO:0005739,GO:0005634,GO:0004844,GO:0097510	mitochondrion|nucleus|uracil DNA N-glycosylase activity|base-excision repair, AP site formation via deaminated base removal	ko03410	Base excision repair
CSS0001951	-0.273867	0.756428	Down	At1g11900	Pentatricopeptide repeat-containing protein At1g11900
CSS0001952	0.605597	0.604789	Up	TCP6	Transcription factor TCP6	GO:0005634,GO:0003700,GO:0043565,GO:0006355	nucleus|DNA-binding transcription factor activity|sequence-specific DNA binding|regulation of DNA-templated transcription
CSS0001953	0.154069	0.755492	Up
CSS0001954	-0.185438	0.571659	Down	TAF4B	Transcription initiation factor TFIID subunit 4b	GO:0005669,GO:0003677,GO:0046982,GO:0006367	transcription factor TFIID complex|DNA binding|protein heterodimerization activity|transcription initiation at RNA polymerase II promoter	ko03022	Basal transcription factors
CSS0001956	0.131897	0.881402	Up	CAD2	Cinnamoyl-CoA reductase CAD2	GO:0045551,GO:0016616,GO:0052747	cinnamyl-alcohol dehydrogenase activity|oxidoreductase activity, acting on the CH-OH group of donors, NAD or NADP as acceptor|sinapyl alcohol dehydrogenase activity
CSS0001957	0.530763	0.37345	Up		Alpha-1,4 glucan phosphorylase L-1 isozyme, chloroplastic/amyloplastic	GO:0009501,GO:0009507,GO:0005737,GO:0008184,GO:0042802,GO:0102250,GO:0030170,GO:0102499,GO:0005980	amyloplast|chloroplast|cytoplasm|glycogen phosphorylase activity|identical protein binding|linear malto-oligosaccharide phosphorylase activity|pyridoxal phosphate binding|SHG alpha-glucan phosphorylase activity|glycogen catabolic process	ko00500	Starch and sucrose metabolism
CSS0001958	-0.499057	0.0832008	Down	TIM23-2	Mitochondrial import inner membrane translocase subunit TIM23-2	GO:0005743,GO:0005739,GO:0005744,GO:0008320,GO:0030150	mitochondrial inner membrane|mitochondrion|TIM23 mitochondrial import inner membrane translocase complex|protein transmembrane transporter activity|protein import into mitochondrial matrix
CSS0001959	0.424415	0.0857656	Up	UBC10	Ubiquitin-conjugating enzyme E2 10	GO:0005634,GO:0005524,GO:0061631,GO:0031625,GO:0004842,GO:0000209,GO:0006511	nucleus|ATP binding|ubiquitin conjugating enzyme activity|ubiquitin protein ligase binding|ubiquitin-protein transferase activity|protein polyubiquitination|ubiquitin-dependent protein catabolic process	ko04141,ko04120,ko03083	Protein processing in endoplasmic reticulum|Ubiquitin mediated proteolysis|Polycomb repressive complex
CSS0001960	3.3961	7.79224e-05	Up	FAAH	Fatty acid amide hydrolase	GO:0005783,GO:0005789,GO:0005794,GO:0016020,GO:0000325,GO:0005886,GO:0009536,GO:0017064,GO:0047412,GO:0042742,GO:0016042,GO:0070291	endoplasmic reticulum|endoplasmic reticulum membrane|Golgi apparatus|membrane|plant-type vacuole|plasma membrane|plastid|fatty acid amide hydrolase activity|N-(long-chain-acyl)ethanolamine deacylase activity|defense response to bacterium|lipid catabolic process|N-acylethanolamine metabolic process
CSS0001961	0.590134	0.364815	Up		21 kDa protein	GO:0004857	enzyme inhibitor activity
CSS0001963	0.242116	0.728964	Up	At4g00755	F-box protein At4g00755
CSS0001964	-1.61939	0.0213347	Down	CSLE6	Cellulose synthase-like protein E6	GO:0000139,GO:0005886,GO:0016760,GO:0051753,GO:0071555,GO:0030244,GO:0009833	Golgi membrane|plasma membrane|cellulose synthase (UDP-forming) activity|mannan synthase activity|cell wall organization|cellulose biosynthetic process|plant-type primary cell wall biogenesis
CSS0001965	-0.0161703	0.982022	Down	PLC6	Phosphoinositide phospholipase C 6	GO:0005886,GO:0004435,GO:0016042,GO:0048015	plasma membrane|phosphatidylinositol phospholipase C activity|lipid catabolic process|phosphatidylinositol-mediated signaling	ko00562,ko04070	Inositol phosphate metabolism|Phosphatidylinositol signaling system
CSS0001966	-0.334027	0.377415	Down	B3GALT2	Probable beta-1,3-galactosyltransferase 2	GO:0005794,GO:0000139,GO:0008378,GO:0016757,GO:0008194,GO:0006486	Golgi apparatus|Golgi membrane|galactosyltransferase activity|glycosyltransferase activity|UDP-glycosyltransferase activity|protein glycosylation
CSS0001967	-0.669051	0.202635	Down	EMB1187	Probable ethanolamine kinase	GO:0005737,GO:0005886,GO:0005524,GO:0004305,GO:0006646,GO:0008654,GO:0016310	cytoplasm|plasma membrane|ATP binding|ethanolamine kinase activity|phosphatidylethanolamine biosynthetic process|phospholipid biosynthetic process|phosphorylation	ko00564	Glycerophospholipid metabolism
CSS0001968	2.53744	1.05328e-06	Up	PIP2-7	Aquaporin PIP2-7	GO:0005886,GO:0009506,GO:0005773,GO:0003729,GO:0015250	plasma membrane|plasmodesma|vacuole|mRNA binding|water channel activity
CSS0001970	-1.04607	0.0013267	Down	OFUT1	O-fucosyltransferase 1	GO:0005737,GO:0005768,GO:0005794,GO:0000139,GO:0000138,GO:0005802,GO:0016757,GO:0006004	cytoplasm|endosome|Golgi apparatus|Golgi membrane|Golgi trans cisterna|trans-Golgi network|glycosyltransferase activity|fucose metabolic process
CSS0001971	-0.323349	0.10388	Down		Eukaryotic translation initiation factor 5A-2	GO:0043022,GO:0003723,GO:0003746,GO:0003743,GO:0045901,GO:0045905	ribosome binding|RNA binding|translation elongation factor activity|translation initiation factor activity|positive regulation of translational elongation|positive regulation of translational termination
CSS0001974	-0.317964	0.369242	Down	RH10	DEAD-box ATP-dependent RNA helicase 10	GO:0005730,GO:0005634,GO:0005524,GO:0016887,GO:0003723,GO:0003724,GO:0006364	nucleolus|nucleus|ATP binding|ATP hydrolysis activity|RNA binding|RNA helicase activity|rRNA processing
CSS0001975	-0.376366	0.31058	Down	DAO	2-oxoglutarate-dependent dioxygenase DAO	GO:0051213,GO:0046872,GO:0009852	dioxygenase activity|metal ion binding|auxin catabolic process	ko00380	Tryptophan metabolism
CSS0001976	1.97711	0.000987349	Up		Beta-galactosidase	GO:0005773,GO:0004565,GO:0030246,GO:0005975	vacuole|beta-galactosidase activity|carbohydrate binding|carbohydrate metabolic process
CSS0001978	0.818592	0.0224939	Up	PAP11	Probable plastid-lipid-associated protein 11, chloroplastic	GO:0009534	chloroplast thylakoid
CSS0001981	-2.38232	0.0843983	Down	DMT1	DNA (cytosine-5)-methyltransferase 1	GO:0005634,GO:0003682,GO:0003886,GO:0003677,GO:0008168,GO:0010424,GO:0009294,GO:0010216,GO:0009910,GO:0006349,GO:0010069	nucleus|chromatin binding|DNA (cytosine-5-)-methyltransferase activity|DNA binding|methyltransferase activity|DNA methylation on cytosine within a CG sequence|DNA-mediated transformation|maintenance of DNA methylation|negative regulation of flower development|regulation of gene expression by genomic imprinting|zygote asymmetric cytokinesis in embryo sac	ko00270	Cysteine and methionine metabolism
CSS0001982	-0.21357	0.634697	Down	PGR5	Protein PROTON GRADIENT REGULATION 5, chloroplastic	GO:0009507,GO:0009534,GO:0009535,GO:0009055,GO:0071484,GO:0010117,GO:0009773,GO:0009644,GO:0009414	chloroplast|chloroplast thylakoid|chloroplast thylakoid membrane|electron transfer activity|cellular response to light intensity|photoprotection|photosynthetic electron transport in photosystem I|response to high light intensity|response to water deprivation
CSS0001984	-0.290049	0.700081	Down		Pathogenesis-related thaumatin-like protein 3.5	GO:0006952,GO:0009737,GO:0009607	defense response|response to abscisic acid|response to biotic stimulus
CSS0001985	-1.52671	0.510483	Down	CUL1	Cullin-1	GO:0031461,GO:0031625,GO:0016567,GO:0006511	cullin-RING ubiquitin ligase complex|ubiquitin protein ligase binding|protein ubiquitination|ubiquitin-dependent protein catabolic process	ko04141,ko04120	Protein processing in endoplasmic reticulum|Ubiquitin mediated proteolysis
CSS0001986	-0.572319	0.714674	Down
CSS0001988	2.8388	1.26945e-12	Up	At1g80640	Probable receptor-like protein kinase At1g80640	GO:0005886,GO:0005524,GO:0106310,GO:0004674,GO:0006468	plasma membrane|ATP binding|protein serine kinase activity|protein serine/threonine kinase activity|protein phosphorylation
CSS0001991	0.417481	0.145308	Up	3BETAHSD/D2	3beta-hydroxysteroid-dehydrogenase/decarboxylase isoform 2	GO:0005783,GO:0005789,GO:0016020,GO:0003854,GO:0102175,GO:0102191,GO:0016616,GO:0047012,GO:0060918,GO:0099402,GO:0032409,GO:0016126	endoplasmic reticulum|endoplasmic reticulum membrane|membrane|3-beta-hydroxy-delta5-steroid dehydrogenase activity|3-beta-hydroxysteroid dehydrogenase/C4-decarboxylase activity|4alpha-carboxy-5alpha-cholesta-7,24-dien-3beta-ol dehydrogenase/C4-decarboxylase activity|oxidoreductase activity, acting on the CH-OH group of donors, NAD or NADP as acceptor|sterol-4-alpha-carboxylate 3-dehydrogenase (de…	ko00100	Steroid biosynthesis
CSS0001992	0.0969811	0.776052	Up	At2g40140	Zinc finger CCCH domain-containing protein 29	GO:0005634,GO:0003677,GO:0003700,GO:0046872,GO:0071456,GO:0050832,GO:0006355,GO:0009409	nucleus|DNA binding|DNA-binding transcription factor activity|metal ion binding|cellular response to hypoxia|defense response to fungus|regulation of DNA-templated transcription|response to cold
CSS0001993	1.10903	0.505655	Up
CSS0001994	1.58315	0.0119606	Up
CSS0001996	-0.856769	0.212058	Down	BGLU24	Beta-glucosidase 24	GO:0033907,GO:0004565,GO:0008422,GO:0102483,GO:0005975	beta-D-fucosidase activity|beta-galactosidase activity|beta-glucosidase activity|scopolin beta-glucosidase activity|carbohydrate metabolic process	ko00500,ko00460,ko00999	Starch and sucrose metabolism|Cyanoamino acid metabolism|Biosynthesis of various plant secondary metabolites
CSS0001997	-0.320504	0.173782	Down		ADP-ribosylation factor 1	GO:0005737,GO:0005794,GO:0005525,GO:0003924,GO:0006886,GO:0016192	cytoplasm|Golgi apparatus|GTP binding|GTPase activity|intracellular protein transport|vesicle-mediated transport	ko04144	Endocytosis
CSS0001998	-0.0950037	0.847372	Down
CSS0002000	0.931344	0.237721	Up	PAI1	N-(5'-phosphoribosyl)anthranilate isomerase 1, chloroplastic	GO:0009507,GO:0004640,GO:0000162	chloroplast|phosphoribosylanthranilate isomerase activity|tryptophan biosynthetic process	ko00400	Phenylalanine, tyrosine and tryptophan biosynthesis
CSS0002001	-0.597716	0.14833	Down	ERDJ2A	DnaJ protein ERDJ2A	GO:0005783,GO:0005794,GO:0005739,GO:0031207,GO:0008320,GO:0006620,GO:0006614	endoplasmic reticulum|Golgi apparatus|mitochondrion|Sec62/Sec63 complex|protein transmembrane transporter activity|post-translational protein targeting to endoplasmic reticulum membrane|SRP-dependent cotranslational protein targeting to membrane	ko03060,ko04141	Protein export|Protein processing in endoplasmic reticulum
CSS0002002	1.67082	0.298061	Up
CSS0002003	0.817947	0.0640449	Up	RNR1	Ribonucleoside-diphosphate reductase large subunit	GO:0005971,GO:0005524,GO:0004748,GO:0009202,GO:0009263,GO:0006260	ribonucleoside-diphosphate reductase complex|ATP binding|ribonucleoside-diphosphate reductase activity, thioredoxin disulfide as acceptor|deoxyribonucleoside triphosphate biosynthetic process|deoxyribonucleotide biosynthetic process|DNA replication	ko00230,ko00240,ko00480	Purine metabolism|Pyrimidine metabolism|Glutathione metabolism
CSS0002004	0.146981	0.741589	Up
CSS0002005	0.0295399	0.976367	Up	RECQL2	ATP-dependent DNA helicase Q-like 2	GO:0005694,GO:0005737,GO:0016592,GO:0043138,GO:0005524,GO:0016887,GO:0003677,GO:0009378,GO:0046872,GO:0032508,GO:0006310,GO:0006281,GO:0006268,GO:0000724	chromosome|cytoplasm|mediator complex|3'-5' DNA helicase activity|ATP binding|ATP hydrolysis activity|DNA binding|four-way junction helicase activity|metal ion binding|DNA duplex unwinding|DNA recombination|DNA repair|DNA unwinding involved in DNA replication|double-strand break repair via homologous recombination
CSS0002006	-0.0480917	0.855046	Down	RBL1	RHOMBOID-like protein 1	GO:0005794,GO:0000139,GO:0004252,GO:0006508	Golgi apparatus|Golgi membrane|serine-type endopeptidase activity|proteolysis
CSS0002008	0.496879	0.544031	Up	ME1	NADP-dependent malic enzyme	GO:0005737,GO:0004471,GO:0004473,GO:0046872,GO:0051287,GO:0008948,GO:0006108	cytoplasm|malate dehydrogenase (decarboxylating) (NAD+) activity|malate dehydrogenase (decarboxylating) (NADP+) activity|metal ion binding|NAD binding|oxaloacetate decarboxylase activity|malate metabolic process	ko00620,ko00710	Pyruvate metabolism|Carbon fixation in photosynthetic organisms
CSS0002009	-1.49652	0.115957	Down	OFP1	Transcription repressor OFP1	GO:0005856,GO:0005730,GO:0003677,GO:0043622,GO:0006281,GO:0045892,GO:0051510	cytoskeleton|nucleolus|DNA binding|cortical microtubule organization|DNA repair|negative regulation of DNA-templated transcription|regulation of unidimensional cell growth
CSS0002010	-2.28628	2.36552e-07	Down	A70	Pathogen-associated molecular patterns-induced protein A70	GO:0016020,GO:0042742,GO:0009617,GO:0009753,GO:0009611	membrane|defense response to bacterium|response to bacterium|response to jasmonic acid|response to wounding
CSS0002011	0.133722	0.742801	Up
CSS0002012	0.0892512	0.954451	Up	BUB3.3	Mitotic checkpoint protein BUB3.3	GO:1990298,GO:0080008,GO:0000776,GO:0033597,GO:0009524,GO:0005819,GO:0043130,GO:0051301,GO:0007059,GO:0051321,GO:0007094	bub1-bub3 complex|Cul4-RING E3 ubiquitin ligase complex|kinetochore|mitotic checkpoint complex|phragmoplast|spindle|ubiquitin binding|cell division|chromosome segregation|meiotic cell cycle|mitotic spindle assembly checkpoint signaling
CSS0002013	-0.962603	0.00225927	Down	CPR1	F-box protein CPR1	GO:0005737,GO:0005634,GO:0031348,GO:0042177,GO:0009626,GO:0016567	cytoplasm|nucleus|negative regulation of defense response|negative regulation of protein catabolic process|plant-type hypersensitive response|protein ubiquitination
CSS0002017	-0.67566	0.270667	Down	SUD1	Probable E3 ubiquitin ligase SUD1	GO:0005789,GO:0004842,GO:0008270,GO:0042335,GO:0010143,GO:0008299,GO:1900486,GO:0009414,GO:0010345,GO:0030433,GO:0010025	endoplasmic reticulum membrane|ubiquitin-protein transferase activity|zinc ion binding|cuticle development|cutin biosynthetic process|isoprenoid biosynthetic process|positive regulation of isopentenyl diphosphate biosynthetic process, mevalonate pathway|response to water deprivation|suberin biosynthetic process|ubiquitin-dependent ERAD pathway|wax biosynthetic process
CSS0002018	1.28116	0.0136294	Up	CYP81Q32	Cytochrome P450 81Q32	GO:0016020,GO:0020037,GO:0005506,GO:0004497,GO:0016705	membrane|heme binding|iron ion binding|monooxygenase activity|oxidoreductase activity, acting on paired donors, with incorporation or reduction of molecular oxygen
CSS0002020	-0.583982	0.285495	Down
CSS0002021	0.209453	0.753546	Up	SIRB	Sirohydrochlorin ferrochelatase, chloroplastic	GO:0009507,GO:0051539,GO:0042802,GO:0051536,GO:0046872,GO:0051266,GO:0006979,GO:0019354	chloroplast|4 iron, 4 sulfur cluster binding|identical protein binding|iron-sulfur cluster binding|metal ion binding|sirohydrochlorin ferrochelatase activity|response to oxidative stress|siroheme biosynthetic process	ko00860	Porphyrin metabolism
CSS0002024	0.819296	0.420227	Up
CSS0002025	1.37714	0.511942	Up
CSS0002027	0.159082	0.590672	Up		UTP--glucose-1-phosphate uridylyltransferase	GO:0005737,GO:0003983,GO:0005977,GO:0006011	cytoplasm|UTP:glucose-1-phosphate uridylyltransferase activity|glycogen metabolic process|UDP-glucose metabolic process	ko00040,ko00052,ko00500,ko00520	Pentose and glucuronate interconversions|Galactose metabolism|Starch and sucrose metabolism|Amino sugar and nucleotide sugar metabolism
CSS0002029	-0.636295	0.0169514	Down	UBP8	Ubiquitin carboxyl-terminal hydrolase 8	GO:0004843,GO:0016579,GO:0006511	cysteine-type deubiquitinase activity|protein deubiquitination|ubiquitin-dependent protein catabolic process
CSS0002030	-0.127163	0.689306	Down					ko00563	Glycosylphosphatidylinositol (GPI)-anchor biosynthesis
CSS0002031	0.887612	0.00908358	Up	BBD2	Bifunctional nuclease 2	GO:0005634,GO:0030891,GO:0004518,GO:0016567	nucleus|VCB complex|nuclease activity|protein ubiquitination
CSS0002032	0.135174	0.606888	Up	GC1	Golgin candidate 1	GO:0005794,GO:0031985,GO:0000139,GO:0005739,GO:0007030,GO:0000301	Golgi apparatus|Golgi cisterna|Golgi membrane|mitochondrion|Golgi organization|retrograde transport, vesicle recycling within Golgi
CSS0002033	-0.632495	0.184883	Down	VHA-d2	V-type proton ATPase subunit d2	GO:0005829,GO:0005794,GO:0000325,GO:0009506,GO:0033179,GO:0016471,GO:0005773,GO:0046961,GO:0007035,GO:0007034	cytosol|Golgi apparatus|plant-type vacuole|plasmodesma|proton-transporting V-type ATPase, V0 domain|vacuolar proton-transporting V-type ATPase complex|vacuole|proton-transporting ATPase activity, rotational mechanism|vacuolar acidification|vacuolar transport
CSS0002034	0.400425	0.369119	Up	SGO2	SHUGOSHIN 2	GO:0000775,GO:0005634,GO:0034090	chromosome, centromeric region|nucleus|maintenance of meiotic sister chromatid cohesion
CSS0002035	-0.334814	0.345468	Down	PPC6-1	Probable protein phosphatase 2C 33	GO:0046872,GO:0017018,GO:0004722,GO:0035970	metal ion binding|myosin phosphatase activity|protein serine/threonine phosphatase activity|peptidyl-threonine dephosphorylation
CSS0002036	1.2662	0.000780574	Up	NCL	Sodium/calcium exchanger NCL	GO:0016020,GO:0000325,GO:0005886,GO:0009506,GO:0005774,GO:0005773,GO:0005509,GO:0015369,GO:0005432,GO:0003729,GO:0055074,GO:0070588,GO:0006874,GO:0071472	membrane|plant-type vacuole|plasma membrane|plasmodesma|vacuolar membrane|vacuole|calcium ion binding|calcium:proton antiporter activity|calcium:sodium antiporter activity|mRNA binding|calcium ion homeostasis|calcium ion transmembrane transport|cellular calcium ion homeostasis|cellular response to salt stress
CSS0002037	0.125142	0.909286	Up
CSS0002038	0.601673	0.178765	Up	YLMG2	YlmG homolog protein 2, chloroplastic	GO:0009535,GO:0010020,GO:0090143	chloroplast thylakoid membrane|chloroplast fission|nucleoid organization
CSS0002039	0.100204	0.776096	Up
CSS0002041	0.0882222	0.825874	Up	SIGB	RNA polymerase sigma factor sigB	GO:0009507,GO:0003677,GO:0016987,GO:0071482,GO:0009658,GO:0006352,GO:2001141,GO:0010114,GO:0006399	chloroplast|DNA binding|sigma factor activity|cellular response to light stimulus|chloroplast organization|DNA-templated transcription initiation|regulation of RNA biosynthetic process|response to red light|tRNA metabolic process
CSS0002045	0.391337	0.473387	Up
CSS0002047	3.10059	0.00546411	Up	IPP	Soluble inorganic pyrophosphatase	GO:0005829,GO:0005654,GO:0004427,GO:0000287,GO:0052546,GO:0052386,GO:0006796	cytosol|nucleoplasm|inorganic diphosphate phosphatase activity|magnesium ion binding|cell wall pectin metabolic process|cell wall thickening|phosphate-containing compound metabolic process	ko00190	Oxidative phosphorylation
CSS0002048	-0.748282	0.00273251	Down	BRO1	Vacuolar-sorting protein BRO1	GO:0005737,GO:0005829,GO:0005768,GO:0005770,GO:0005771,GO:0009506,GO:0043621,GO:0043130,GO:0099638,GO:0036257,GO:0043328,GO:0007033	cytoplasm|cytosol|endosome|late endosome|multivesicular body|plasmodesma|protein self-association|ubiquitin binding|endosome to plasma membrane protein transport|multivesicular body organization|protein transport to vacuole involved in ubiquitin-dependent protein catabolic process via the multivesicular body sorting pathway|vacuole organization	ko03250,ko04144	Viral life cycle - HIV-1|Endocytosis
CSS0002049	0.0569016	0.877815	Up	MED32	Mediator of RNA polymerase II transcription subunit 32	GO:0016592,GO:0003712,GO:0009738,GO:0009631,GO:0010150,GO:0045944,GO:0042542,GO:0048364	mediator complex|transcription coregulator activity|abscisic acid-activated signaling pathway|cold acclimation|leaf senescence|positive regulation of transcription by RNA polymerase II|response to hydrogen peroxide|root development
CSS0002054	-0.629555	0.0727306	Down	CTR1	Serine/threonine-protein kinase CTR1	GO:0005789,GO:0005524,GO:0106310,GO:0004674,GO:0004712,GO:0009873,GO:0009686,GO:0010105,GO:0046777,GO:2000069,GO:2000035,GO:0048510,GO:0009723,GO:0009750,GO:0001666,GO:0009744,GO:0010182	endoplasmic reticulum membrane|ATP binding|protein serine kinase activity|protein serine/threonine kinase activity|protein serine/threonine/tyrosine kinase activity|ethylene-activated signaling pathway|gibberellin biosynthetic process|negative regulation of ethylene-activated signaling pathway|protein autophosphorylation|regulation of post-embryonic root development|regulation of stem cell divisi…	ko04016,ko04075	MAPK signaling pathway - plant|Plant hormone signal transduction
CSS0002055	-3.65374	4.40207e-06	Down	DTX6	Protein DETOXIFICATION 6	GO:0016020,GO:0015297,GO:0022857,GO:0042910,GO:1990961	membrane|antiporter activity|transmembrane transporter activity|xenobiotic transmembrane transporter activity|xenobiotic detoxification by transmembrane export across the plasma membrane
CSS0002057	-0.237638	0.656756	Down
CSS0002059	-0.541617	0.0136495	Down	FTSH4	ATP-dependent zinc metalloprotease FTSH 4, mitochondrial	GO:0009534,GO:0005743,GO:0005739,GO:0005524,GO:0016887,GO:0004176,GO:0046872,GO:0004222,GO:0010073,GO:0006508	chloroplast thylakoid|mitochondrial inner membrane|mitochondrion|ATP binding|ATP hydrolysis activity|ATP-dependent peptidase activity|metal ion binding|metalloendopeptidase activity|meristem maintenance|proteolysis
CSS0002060	3.98461	0.0231585	Up
CSS0002061	-1.96673	0.508645	Down	MAF1	MFP1 attachment factor 1	GO:0005794,GO:0005635,GO:0016363,GO:0048527,GO:0000278	Golgi apparatus|nuclear envelope|nuclear matrix|lateral root development|mitotic cell cycle
CSS0002062	-0.196031	0.304273	Down	GAPC	Glyceraldehyde-3-phosphate dehydrogenase, cytosolic	GO:0005737,GO:0004365,GO:0051287,GO:0050661,GO:0006006,GO:0006096	cytoplasm|glyceraldehyde-3-phosphate dehydrogenase (NAD+) (phosphorylating) activity|NAD binding|NADP binding|glucose metabolic process|glycolytic process
CSS0002064	0.228459	0.301674	Up	At3g03305	Putative metallophosphoesterase At3g03305	GO:0016020,GO:0016787,GO:0046872	membrane|hydrolase activity|metal ion binding
CSS0002066	-0.250508	0.392033	Down	UGT87A1	UDP-glycosyltransferase 87A1	GO:0008194	UDP-glycosyltransferase activity
CSS0002067	0.240715	0.695048	Up
CSS0002068	-1.4913	0.589192	Down	9DC3	Receptor-like protein 9DC3	GO:0005886,GO:0050832	plasma membrane|defense response to fungus
CSS0002070	-0.289872	0.660705	Down	AARE	Acylamino-acid-releasing enzyme	GO:0009507,GO:0005737,GO:0005829,GO:0005634,GO:0005773,GO:0070009,GO:0004252,GO:0051289,GO:0006508	chloroplast|cytoplasm|cytosol|nucleus|vacuole|serine-type aminopeptidase activity|serine-type endopeptidase activity|protein homotetramerization|proteolysis
CSS0002072	-0.27785	0.546236	Down	At5g10290	Probable LRR receptor-like serine/threonine-protein kinase At5g10290	GO:0005886,GO:0005524,GO:0042802,GO:0106310,GO:0004674,GO:0006468	plasma membrane|ATP binding|identical protein binding|protein serine kinase activity|protein serine/threonine kinase activity|protein phosphorylation
CSS0002073	2.28418	0.00178749	Up	WAK2	Wall-associated receptor kinase 2	GO:0005634,GO:0005886,GO:0005524,GO:0005509,GO:0030247,GO:0106310,GO:0004674,GO:0007166,GO:0009992,GO:0009311,GO:0006468,GO:0009751,GO:0009826	nucleus|plasma membrane|ATP binding|calcium ion binding|polysaccharide binding|protein serine kinase activity|protein serine/threonine kinase activity|cell surface receptor signaling pathway|cellular water homeostasis|oligosaccharide metabolic process|protein phosphorylation|response to salicylic acid|unidimensional cell growth
CSS0002075	1.38276	0.124276	Up	KIN14E	Kinesin-like protein KIN-14E	GO:0055028,GO:0005856,GO:0005871,GO:0005874,GO:0072686,GO:0009524,GO:0051015,GO:0043531,GO:0005524,GO:0016887,GO:0005509,GO:0005516,GO:0008017,GO:0003777,GO:0008569,GO:0016491,GO:0042803,GO:0019901,GO:0043622,GO:0001578,GO:0007018,GO:0010091,GO:0048629	cortical microtubule|cytoskeleton|kinesin complex|microtubule|mitotic spindle|phragmoplast|actin filament binding|ADP binding|ATP binding|ATP hydrolysis activity|calcium ion binding|calmodulin binding|microtubule binding|microtubule motor activity|minus-end-directed microtubule motor activity|oxidoreductase activity|protein homodimerization activity|protein kinase binding|cortical microtubule org…
CSS0002077	0.0648602	0.873956	Up	RGP5	Probable UDP-arabinopyranose mutase 5	GO:0005829,GO:0005794,GO:0009506,GO:0009536,GO:0016866,GO:0071555,GO:0009832,GO:0033356	cytosol|Golgi apparatus|plasmodesma|plastid|intramolecular transferase activity|cell wall organization|plant-type cell wall biogenesis|UDP-L-arabinose metabolic process	ko00520	Amino sugar and nucleotide sugar metabolism
CSS0002078	0.0483306	0.924101	Up	ORC4	Origin of replication complex subunit 4	GO:0005664,GO:0005524,GO:0016887,GO:0003688,GO:0006270	nuclear origin of replication recognition complex|ATP binding|ATP hydrolysis activity|DNA replication origin binding|DNA replication initiation
CSS0002080	-1.11504	0.00364324	Down	TAD3	tRNA-specific adenosine deaminase TAD3	GO:0005737,GO:0005634,GO:0046872,GO:0008251,GO:0006400	cytoplasm|nucleus|metal ion binding|tRNA-specific adenosine deaminase activity|tRNA modification
CSS0002081	-0.920414	0.037063	Down	HSR4	Protein HYPER-SENSITIVITY-RELATED 4	GO:0005740,GO:0005741,GO:0005739,GO:0005524,GO:0016887,GO:0042802,GO:0008219,GO:0009626,GO:0009617,GO:0002237,GO:0009411,GO:0009863	mitochondrial envelope|mitochondrial outer membrane|mitochondrion|ATP binding|ATP hydrolysis activity|identical protein binding|cell death|plant-type hypersensitive response|response to bacterium|response to molecule of bacterial origin|response to UV|salicylic acid mediated signaling pathway
CSS0002082	2.16941	0.000310347	Up		Pyruvate kinase isozyme A, chloroplastic	GO:0009507,GO:0005524,GO:0016301,GO:0000287,GO:0030955,GO:0004743	chloroplast|ATP binding|kinase activity|magnesium ion binding|potassium ion binding|pyruvate kinase activity	ko00010,ko00620	Glycolysis / Gluconeogenesis|Pyruvate metabolism
CSS0002085	-0.342383	0.213828	Down	POLH	DNA polymerase eta	GO:0005634,GO:0005657,GO:0035861,GO:0003684,GO:0003887,GO:0046872,GO:0006260,GO:0042276,GO:0009314,GO:0010224,GO:0009650	nucleus|replication fork|site of double-strand break|damaged DNA binding|DNA-directed DNA polymerase activity|metal ion binding|DNA replication|error-prone translesion synthesis|response to radiation|response to UV-B|UV protection
CSS0002088	-0.765333	0.314658	Down
CSS0002089	1.00873	0.176677	Up
CSS0002090	0.171711	0.626733	Up
CSS0002091	-0.758984	0.290978	Down
CSS0002094	0.710469	0.202821	Up	THA1	Low-specificity L-threonine aldolase 1	GO:0005829,GO:0008732,GO:0004793,GO:0006545,GO:0006567	cytosol|L-allo-threonine aldolase activity|threonine aldolase activity|glycine biosynthetic process|threonine catabolic process	ko00260	Glycine, serine and threonine metabolism
CSS0002096	0.827853	0.40055	Up	PGR3	Pentatricopeptide repeat-containing protein At4g31850, chloroplastic	GO:0009507,GO:0003729,GO:0032544,GO:0043489,GO:0006412	chloroplast|mRNA binding|plastid translation|RNA stabilization|translation
CSS0002099	-0.62524	0.13497	Down	AMPD	AMP deaminase	GO:0005829,GO:0005783,GO:0043231,GO:0016020,GO:0003876,GO:0005524,GO:0046872,GO:0043424,GO:0046033,GO:0009793,GO:0006188,GO:0032264	cytosol|endoplasmic reticulum|intracellular membrane-bounded organelle|membrane|AMP deaminase activity|ATP binding|metal ion binding|protein histidine kinase binding|AMP metabolic process|embryo development ending in seed dormancy|IMP biosynthetic process|IMP salvage	ko00230	Purine metabolism
CSS0002102	-0.0939124	0.794539	Down	A36	Aspartic proteinase 36	GO:0005737,GO:0005829,GO:0005886,GO:0090406,GO:0004190,GO:0009555,GO:0009846,GO:0009860,GO:0010183,GO:0030163,GO:0006508	cytoplasm|cytosol|plasma membrane|pollen tube|aspartic-type endopeptidase activity|pollen development|pollen germination|pollen tube growth|pollen tube guidance|protein catabolic process|proteolysis
CSS0002105	0.352208	0.901114	Up	LBD36	LOB domain-containing protein 36	GO:0009965,GO:0048441,GO:0009954,GO:0006355	leaf morphogenesis|petal development|proximal/distal pattern formation|regulation of DNA-templated transcription
CSS0002106	-0.112466	0.759586	Down	HSA32	Protein HEAT-STRESS-ASSOCIATED 32	GO:0010286,GO:0010608,GO:0009408	heat acclimation|post-transcriptional regulation of gene expression|response to heat
CSS0002108	-0.189868	0.943328	Down	LTI65	Low-temperature-induced 65 kDa protein	GO:0009738,GO:0010150,GO:0009737,GO:0009409,GO:0009651,GO:0009414	abscisic acid-activated signaling pathway|leaf senescence|response to abscisic acid|response to cold|response to salt stress|response to water deprivation
CSS0002109	-0.794466	0.787967	Down	Os02g0491600	Putative germin-like protein 2-1	GO:0048046,GO:0030145	apoplast|manganese ion binding
CSS0002111	-0.480009	0.241615	Down	GSTL3	Glutathione S-transferase L3	GO:0005829,GO:0005886,GO:0004364,GO:0010731,GO:0009636	cytosol|plasma membrane|glutathione transferase activity|protein glutathionylation|response to toxic substance	ko00480	Glutathione metabolism
CSS0002112	-0.196524	0.558995	Down	CYP22	Peptidyl-prolyl cis-trans isomerase CYP22	GO:0005737,GO:0043231,GO:0000325,GO:0005886,GO:0016018,GO:0003755,GO:0006457,GO:0000413	cytoplasm|intracellular membrane-bounded organelle|plant-type vacuole|plasma membrane|cyclosporin A binding|peptidyl-prolyl cis-trans isomerase activity|protein folding|protein peptidyl-prolyl isomerization	ko03040	Spliceosome
CSS0002113	0.923037	0.0304009	Up	PHYLLO	Protein PHYLLO, chloroplastic	GO:0031969,GO:0070204,GO:0070205,GO:0046872,GO:0043748,GO:0030976,GO:0009063,GO:0009234,GO:0042550,GO:0042372	chloroplast membrane|2-succinyl-5-enolpyruvyl-6-hydroxy-3-cyclohexene-1-carboxylic-acid synthase activity|2-succinyl-6-hydroxy-2,4-cyclohexadiene-1-carboxylate synthase activity|metal ion binding|O-succinylbenzoate synthase activity|thiamine pyrophosphate binding|amino acid catabolic process|menaquinone biosynthetic process|photosystem I stabilization|phylloquinone biosynthetic process	ko00130	Ubiquinone and other terpenoid-quinone biosynthesis
CSS0002115	6.76905	9.39216e-05	Up	At4g18596	Pollen-specific protein-like At4g18596	GO:0005615	extracellular space
CSS0002116	-0.425817	0.0158141	Down	PUX8	Plant UBX domain-containing protein 8	GO:0005829,GO:0005783,GO:0043130,GO:0030433,GO:0016192	cytosol|endoplasmic reticulum|ubiquitin binding|ubiquitin-dependent ERAD pathway|vesicle-mediated transport
CSS0002117	0.60021	0.639538	Up
CSS0002119	1.16829	0.0244613	Up	BOR2	Probable boron transporter 2	GO:0005886,GO:0046715,GO:0005452,GO:0022857,GO:0050801,GO:0048364,GO:0055085	plasma membrane|active borate transmembrane transporter activity|solute:inorganic anion antiporter activity|transmembrane transporter activity|ion homeostasis|root development|transmembrane transport
CSS0002120	-0.531322	0.278014	Down	NMNAT	Nicotinamide/nicotinic acid mononucleotide adenylyltransferase	GO:0005634,GO:0005524,GO:0046872,GO:0000309,GO:0004515,GO:0009435	nucleus|ATP binding|metal ion binding|nicotinamide-nucleotide adenylyltransferase activity|nicotinate-nucleotide adenylyltransferase activity|NAD biosynthetic process	ko00760	Nicotinate and nicotinamide metabolism
CSS0002121	-1.46942	0.358428	Down	SD11	G-type lectin S-receptor-like serine/threonine-protein kinase SD1-1	GO:0005886,GO:0009506,GO:0005524,GO:0005516,GO:0030246,GO:0106310,GO:0004674,GO:0031625,GO:0006468,GO:0048544	plasma membrane|plasmodesma|ATP binding|calmodulin binding|carbohydrate binding|protein serine kinase activity|protein serine/threonine kinase activity|ubiquitin protein ligase binding|protein phosphorylation|recognition of pollen
CSS0002122	0.308716	0.228635	Up	At2g25430	Putative clathrin assembly protein At2g25430	GO:0005905,GO:0030136,GO:0005794,GO:0005773,GO:0005545,GO:0032050,GO:0005546,GO:0000149,GO:0048268,GO:0072583,GO:0006900	clathrin-coated pit|clathrin-coated vesicle|Golgi apparatus|vacuole|1-phosphatidylinositol binding|clathrin heavy chain binding|phosphatidylinositol-4,5-bisphosphate binding|SNARE binding|clathrin coat assembly|clathrin-dependent endocytosis|vesicle budding from membrane
CSS0002124	0.639721	0.288458	Up	TET2	Tetraspanin-2	GO:0005886,GO:0009506,GO:0009734	plasma membrane|plasmodesma|auxin-activated signaling pathway
CSS0002126	-0.743886	0.2572	Down	RLK5	Receptor-like protein kinase 5	GO:0005886,GO:0005524,GO:0004672,GO:0106310,GO:0004674,GO:0004714,GO:0050829,GO:0010227,GO:0010102,GO:0060866,GO:0045490,GO:0046777,GO:0010468	plasma membrane|ATP binding|protein kinase activity|protein serine kinase activity|protein serine/threonine kinase activity|transmembrane receptor protein tyrosine kinase activity|defense response to Gram-negative bacterium|floral organ abscission|lateral root morphogenesis|leaf abscission|pectin catabolic process|protein autophosphorylation|regulation of gene expression
CSS0002127	-0.0668679	0.793915	Down
CSS0002128	6.97947	0.000281774	Up	ANT	AP2-like ethylene-responsive transcription factor ANT	GO:0005634,GO:0003677,GO:0003700,GO:0000976,GO:0030154,GO:0051301,GO:0009908,GO:0019760,GO:0010492,GO:0010601,GO:0042127	nucleus|DNA binding|DNA-binding transcription factor activity|transcription cis-regulatory region binding|cell differentiation|cell division|flower development|glucosinolate metabolic process|maintenance of shoot apical meristem identity|positive regulation of auxin biosynthetic process|regulation of cell population proliferation
CSS0002129	0.572868	0.270724	Up	At4g19890	Pentatricopeptide repeat-containing protein At4g19890
CSS0002130	1.77521	2.7197e-10	Up	DME	Transcriptional activator DEMETER	GO:0005634,GO:0043078,GO:0051539,GO:0003677,GO:0035514,GO:0019104,GO:0003906,GO:0046872,GO:0032183,GO:0006284,GO:0080111,GO:0006306,GO:0009793,GO:0006349	nucleus|polar nucleus|4 iron, 4 sulfur cluster binding|DNA binding|DNA demethylase activity|DNA N-glycosylase activity|DNA-(apurinic or apyrimidinic site) endonuclease activity|metal ion binding|SUMO binding|base-excision repair|DNA demethylation|DNA methylation|embryo development ending in seed dormancy|regulation of gene expression by genomic imprinting
CSS0002132	-0.0913941	0.711415	Down	CCS1	Cytochrome c biogenesis protein CCS1, chloroplastic	GO:0009535,GO:0017004	chloroplast thylakoid membrane|cytochrome complex assembly
CSS0002133	0.572249	0.15117	Up	PNSL4	Photosynthetic NDH subunit of lumenal location 4, chloroplastic	GO:0009507,GO:0009543,GO:0009535,GO:0005886,GO:0009579,GO:0003755	chloroplast|chloroplast thylakoid lumen|chloroplast thylakoid membrane|plasma membrane|thylakoid|peptidyl-prolyl cis-trans isomerase activity
CSS0002135	0.473101	0.496579	Up	PAO5	Polyamine oxidase 5	GO:0005777,GO:0050660,GO:0052894,GO:0016491,GO:0046592,GO:0052901,GO:0006598,GO:0046208,GO:1903602	peroxisome|flavin adenine dinucleotide binding|norspermine:oxygen oxidoreductase activity|oxidoreductase activity|polyamine oxidase activity|spermine:oxygen oxidoreductase (spermidine-forming) activity|polyamine catabolic process|spermine catabolic process|thermospermine catabolic process	ko00330,ko00410,ko00770	Arginine and proline metabolism|beta-Alanine metabolism|Pantothenate and CoA biosynthesis
CSS0002136	-0.209415	0.739797	Down	DJA6	Chaperone protein dnaJ A6	GO:0005737,GO:0005829,GO:0005783,GO:0005634,GO:0005524,GO:0051087,GO:0030544,GO:0046872,GO:0051082,GO:0006952,GO:0042026,GO:0009408	cytoplasm|cytosol|endoplasmic reticulum|nucleus|ATP binding|chaperone binding|Hsp70 protein binding|metal ion binding|unfolded protein binding|defense response|protein refolding|response to heat	ko04141	Protein processing in endoplasmic reticulum
CSS0002137	-7.15103	0.0134318	Down	ASAT1	Acyl-CoA--sterol O-acyltransferase 1	GO:0016020,GO:0008374,GO:0016127	membrane|O-acyltransferase activity|sterol catabolic process
CSS0002138	0.443155	0.481483	Up	AVT1C	Amino acid transporter AVT1C	GO:0016020,GO:0000325,GO:0015171,GO:0003333	membrane|plant-type vacuole|amino acid transmembrane transporter activity|amino acid transmembrane transport
CSS0002139	0.212063	0.631231	Up	ALAAT1	Alanine aminotransferase 1, mitochondrial	GO:0005739,GO:0005634,GO:0005524,GO:0004021,GO:0030170,GO:0009058,GO:0071456,GO:0019481,GO:0046686,GO:0001666	mitochondrion|nucleus|ATP binding|L-alanine:2-oxoglutarate aminotransferase activity|pyridoxal phosphate binding|biosynthetic process|cellular response to hypoxia|L-alanine catabolic process, by transamination|response to cadmium ion|response to hypoxia	ko00710,ko00250,ko00220	Carbon fixation in photosynthetic organisms|Alanine, aspartate and glutamate metabolism|Arginine biosynthesis
CSS0002140	0.657657	0.0769601	Up	At2g17570	Dehydrodolichyl diphosphate synthase 6	GO:0005783,GO:0002094,GO:0016094,GO:0006486	endoplasmic reticulum|polyprenyltransferase activity|polyprenol biosynthetic process|protein glycosylation	ko00900	Terpenoid backbone biosynthesis
CSS0002141	-1.2997	0.00442167	Down	CYP80B3	(S)-N-methylcoclaurine 3'-hydroxylase isozyme 1 (Fragment)	GO:0005783,GO:0020037,GO:0005506,GO:0050593,GO:1901012,GO:0002238	endoplasmic reticulum|heme binding|iron ion binding|N-methylcoclaurine 3'-monooxygenase activity|(S)-reticuline biosynthetic process|response to molecule of fungal origin
CSS0002142	1.99671	0.00717409	Up	ALIS3	ALA-interacting subunit 3	GO:0005783,GO:0005789,GO:0005794,GO:0000139,GO:0005634,GO:0005886,GO:0033036	endoplasmic reticulum|endoplasmic reticulum membrane|Golgi apparatus|Golgi membrane|nucleus|plasma membrane|macromolecule localization	ko04148	Efferocytosis
CSS0002143	-1.5546	0.0073046	Down
CSS0002144	-0.43008	0.0196785	Down	CALS9	Callose synthase 9	GO:0000148,GO:0005829,GO:0005794,GO:0005886,GO:0003843,GO:0046527,GO:0006075,GO:0052543,GO:0048589,GO:0055047,GO:0009556,GO:0009555,GO:0009846,GO:0008360,GO:0080092	1,3-beta-D-glucan synthase complex|cytosol|Golgi apparatus|plasma membrane|1,3-beta-D-glucan synthase activity|glucosyltransferase activity|(1->3)-beta-D-glucan biosynthetic process|callose deposition in cell wall|developmental growth|generative cell mitosis|microsporogenesis|pollen development|pollen germination|regulation of cell shape|regulation of pollen tube growth
CSS0002145	-0.461744	0.0542064	Down		Lon protease homolog 2, peroxisomal	GO:0005782,GO:0005524,GO:0016887,GO:0004176,GO:0004252,GO:0016558,GO:0016485,GO:0006515	peroxisomal matrix|ATP binding|ATP hydrolysis activity|ATP-dependent peptidase activity|serine-type endopeptidase activity|protein import into peroxisome matrix|protein processing|protein quality control for misfolded or incompletely synthesized proteins
CSS0002146	0.241413	0.500235	Up
CSS0002148	0.45289	0.355651	Up	At5g54890	CRS2-associated factor 2, mitochondrial	GO:0005739,GO:1990904,GO:0003723,GO:0000373,GO:0006397	mitochondrion|ribonucleoprotein complex|RNA binding|Group II intron splicing|mRNA processing
CSS0002150	0.304719	0.355449	Up
CSS0002151	0.155615	0.489547	Up					ko00230,ko00240,ko00760	Purine metabolism|Pyrimidine metabolism|Nicotinate and nicotinamide metabolism
CSS0002152	0.120016	0.618502	Up	AAP3	Amino acid permease 3	GO:0016020,GO:0031965,GO:0005886,GO:0015171,GO:0015174,GO:0015293,GO:0003333,GO:0015802,GO:0006952	membrane|nuclear membrane|plasma membrane|amino acid transmembrane transporter activity|basic amino acid transmembrane transporter activity|symporter activity|amino acid transmembrane transport|basic amino acid transport|defense response
CSS0002155	0.161241	0.613112	Up
CSS0002156	0.698042	0.1501	Up	GLO4	Peroxisomal (S)-2-hydroxyacid oxidase GLO4	GO:0005777,GO:0003973,GO:0010181,GO:0042742,GO:0006631,GO:0050665	peroxisome|(S)-2-hydroxy-acid oxidase activity|FMN binding|defense response to bacterium|fatty acid metabolic process|hydrogen peroxide biosynthetic process	ko00630,ko04146	Glyoxylate and dicarboxylate metabolism|Peroxisome
CSS0002157	1.09612	0.164152	Up	NPG1	Protein NPG1	GO:0031234,GO:0005886,GO:0005516,GO:0009555,GO:0009846	extrinsic component of cytoplasmic side of plasma membrane|plasma membrane|calmodulin binding|pollen development|pollen germination
CSS0002158	-0.207417	0.836242	Down
CSS0002159	-0.301629	0.388475	Down	HEN4	KH domain-containing protein HEN4	GO:0005737,GO:0016607,GO:0005634,GO:0003729,GO:0030154,GO:0048497,GO:0006397,GO:0009911,GO:0010468	cytoplasm|nuclear speck|nucleus|mRNA binding|cell differentiation|maintenance of floral organ identity|mRNA processing|positive regulation of flower development|regulation of gene expression
CSS0002161	-0.370374	0.6672	Down
CSS0002162	-0.346153	0.0873188	Down
CSS0002163	0.952728	0.496475	Up	DK-ACO1	1-aminocyclopropane-1-carboxylate oxidase	GO:0009815,GO:0031418,GO:0046872,GO:0009693,GO:0009835	1-aminocyclopropane-1-carboxylate oxidase activity|L-ascorbic acid binding|metal ion binding|ethylene biosynthetic process|fruit ripening	ko00270	Cysteine and methionine metabolism
CSS0002166	0.439812	0.145809	Up
CSS0002167	-4.031	0.0210792	Down	CYP704C1	Cytochrome P450 704C1	GO:0016020,GO:0020037,GO:0005506,GO:0004497,GO:0016705	membrane|heme binding|iron ion binding|monooxygenase activity|oxidoreductase activity, acting on paired donors, with incorporation or reduction of molecular oxygen
CSS0002170	4.7341	1.49345e-05	Up	At4g19050	Putative disease resistance protein At4g19050	GO:0043531,GO:0005524,GO:0006952	ADP binding|ATP binding|defense response
CSS0002171	1.53564	0.337905	Up
CSS0002173	-0.886047	0.184396	Down	At1g79990	Coatomer subunit beta'-1	GO:0030126,GO:0000139,GO:0005739,GO:0005198,GO:0006888,GO:0006891,GO:0006886,GO:0006890	COPI vesicle coat|Golgi membrane|mitochondrion|structural molecule activity|endoplasmic reticulum to Golgi vesicle-mediated transport|intra-Golgi vesicle-mediated transport|intracellular protein transport|retrograde vesicle-mediated transport, Golgi to endoplasmic reticulum
CSS0002174	-4.01609	0.291764	Down
CSS0002175	-0.345357	0.478499	Down	At3g19360	Zinc finger CCCH domain-containing protein 39	GO:0003677,GO:0003700,GO:0046872,GO:0003729,GO:0006355	DNA binding|DNA-binding transcription factor activity|metal ion binding|mRNA binding|regulation of DNA-templated transcription
CSS0002176	-0.439811	0.0650196	Down
CSS0002177	-0.334243	0.0929402	Down	PIS1	CDP-diacylglycerol--inositol 3-phosphatidyltransferase 1	GO:0005783,GO:0005794,GO:0016020,GO:0003881,GO:0046872,GO:0006661,GO:0008654	endoplasmic reticulum|Golgi apparatus|membrane|CDP-diacylglycerol-inositol 3-phosphatidyltransferase activity|metal ion binding|phosphatidylinositol biosynthetic process|phospholipid biosynthetic process	ko00562,ko00564,ko04070	Inositol phosphate metabolism|Glycerophospholipid metabolism|Phosphatidylinositol signaling system
CSS0002178	0.202092	0.729321	Up	CFL1	Protein CURLY FLAG LEAF 1	GO:0005524,GO:0004386,GO:0016787,GO:0042335	ATP binding|helicase activity|hydrolase activity|cuticle development
CSS0002181	4.84836	4.6565e-14	Up	IQD21	Protein IQ-DOMAIN 21	GO:0005737,GO:0005856,GO:0005634,GO:0005886,GO:0005516,GO:0009738,GO:0055074,GO:0019722,GO:0071244,GO:0090333,GO:0009737,GO:0009409,GO:0042542	cytoplasm|cytoskeleton|nucleus|plasma membrane|calmodulin binding|abscisic acid-activated signaling pathway|calcium ion homeostasis|calcium-mediated signaling|cellular response to carbon dioxide|regulation of stomatal closure|response to abscisic acid|response to cold|response to hydrogen peroxide
CSS0002182	0.598561	0.0479105	Up	MOCS2	Molybdopterin synthase catalytic subunit	GO:0005829,GO:0019008,GO:0030366,GO:0006777	cytosol|molybdopterin synthase complex|molybdopterin synthase activity|Mo-molybdopterin cofactor biosynthetic process	ko00790,ko04122	Folate biosynthesis|Sulfur relay system
CSS0002183	-0.309312	0.364317	Down		NADP-specific glutamate dehydrogenase (Fragment)	GO:0009507,GO:0004354,GO:0006520	chloroplast|glutamate dehydrogenase (NADP+) activity|amino acid metabolic process	ko00910,ko00250,ko00220	Nitrogen metabolism|Alanine, aspartate and glutamate metabolism|Arginine biosynthesis
CSS0002185	-0.190404	0.658124	Down
CSS0002186	-4.71226	0.000170308	Down	ACA13	Putative calcium-transporting ATPase 13, plasma membrane-type	GO:0043231,GO:0005886,GO:0005524,GO:0016887,GO:0019829,GO:0005516,GO:0046872,GO:0005388	intracellular membrane-bounded organelle|plasma membrane|ATP binding|ATP hydrolysis activity|ATPase-coupled cation transmembrane transporter activity|calmodulin binding|metal ion binding|P-type calcium transporter activity
CSS0002187	-0.0591343	0.801262	Down
CSS0002188	0.0697019	0.728057	Up	APP2	Aminopeptidase P2	GO:0009507,GO:0009570,GO:0005829,GO:0046872,GO:0070006,GO:0006508	chloroplast|chloroplast stroma|cytosol|metal ion binding|metalloaminopeptidase activity|proteolysis
CSS0002190	1.26444	0.0225556	Up	ABA3	Molybdenum cofactor sulfurase	GO:0008265,GO:0102867,GO:0030151,GO:0030170,GO:0009000,GO:0009688,GO:0009734,GO:0042742,GO:0006777,GO:0018315,GO:0045037,GO:0009409,GO:0009749,GO:0009408,GO:0006970,GO:0009651,GO:0010118,GO:0010182	Mo-molybdopterin cofactor sulfurase activity|molybdenum cofactor sulfurtransferase activity|molybdenum ion binding|pyridoxal phosphate binding|selenocysteine lyase activity|abscisic acid biosynthetic process|auxin-activated signaling pathway|defense response to bacterium|Mo-molybdopterin cofactor biosynthetic process|molybdenum incorporation into molybdenum-molybdopterin complex|protein import in…
CSS0002191	-0.967197	0.11969	Down	At3g47570	Probable LRR receptor-like serine/threonine-protein kinase At3g47570	GO:0005886,GO:0005524,GO:0106310,GO:0004674,GO:0006468	plasma membrane|ATP binding|protein serine kinase activity|protein serine/threonine kinase activity|protein phosphorylation
CSS0002192	-4.78537	0.222896	Down	IQM2	IQ domain-containing protein IQM2	GO:0005737,GO:0005634	cytoplasm|nucleus
CSS0002194	0.115595	0.792967	Up	GSNAP	Gamma-soluble NSF attachment protein	GO:0005829,GO:0031201,GO:0005483,GO:0019905,GO:0006886,GO:0016192	cytosol|SNARE complex|soluble NSF attachment protein activity|syntaxin binding|intracellular protein transport|vesicle-mediated transport
CSS0002198	-0.252555	0.328507	Down
CSS0002199	4.33781	0.00222471	Up	CYP707A2	Abscisic acid 8'-hydroxylase 2	GO:0016020,GO:0010295,GO:0020037,GO:0005506,GO:0004497,GO:0016491,GO:0046345,GO:0009687,GO:0048838,GO:0010114,GO:0009639,GO:0016125	membrane|(+)-abscisic acid 8'-hydroxylase activity|heme binding|iron ion binding|monooxygenase activity|oxidoreductase activity|abscisic acid catabolic process|abscisic acid metabolic process|release of seed from dormancy|response to red light|response to red or far red light|sterol metabolic process
CSS0002200	1.9968	0.00371008	Up
CSS0002201	0.0115662	0.971515	Up	CML48	Probable calcium-binding protein CML48	GO:0005509	calcium ion binding	ko04626	Plant-pathogen interaction
CSS0002204	-0.412092	0.571836	Down		Serine hydroxymethyltransferase, mitochondrial	GO:0005737,GO:0005829,GO:0005739,GO:0010319,GO:0004372,GO:0003729,GO:0008266,GO:0030170,GO:0070905,GO:0008270,GO:0007623,GO:0046655,GO:0019264,GO:0006565,GO:0006730,GO:0009853,GO:0009409,GO:0009416,GO:0035999,GO:0046653	cytoplasm|cytosol|mitochondrion|stromule|glycine hydroxymethyltransferase activity|mRNA binding|poly(U) RNA binding|pyridoxal phosphate binding|serine binding|zinc ion binding|circadian rhythm|folic acid metabolic process|glycine biosynthetic process from serine|L-serine catabolic process|one-carbon metabolic process|photorespiration|response to cold|response to light stimulus|tetrahydrofolate in…	ko00630,ko00260,ko00460,ko00670	Glyoxylate and dicarboxylate metabolism|Glycine, serine and threonine metabolism|Cyanoamino acid metabolism|One carbon pool by folate
CSS0002205	-0.15907	0.513641	Down	OHP2	Light-harvesting complex-like protein OHP2, chloroplastic	GO:0009507,GO:0009534,GO:0009535,GO:0005634,GO:0010207,GO:0009642	chloroplast|chloroplast thylakoid|chloroplast thylakoid membrane|nucleus|photosystem II assembly|response to light intensity
CSS0002207	-0.139718	0.863653	Down	WDL7	Protein WVD2-like 7	GO:0055028,GO:0009737	cortical microtubule|response to abscisic acid
CSS0002208	-0.329853	0.103231	Down	RHF2A	E3 ubiquitin-protein ligase RHF2A	GO:0046872,GO:0004842,GO:0009561,GO:0055046,GO:0051603,GO:0051726	metal ion binding|ubiquitin-protein transferase activity|megagametogenesis|microgametogenesis|proteolysis involved in protein catabolic process|regulation of cell cycle
CSS0002209	0.566382	0.521047	Up	VPS3	Vacuolar sorting protein 3	GO:0033263,GO:0005737,GO:0010008,GO:0016020,GO:0006914,GO:0034058,GO:0006886,GO:0010015	CORVET complex|cytoplasm|endosome membrane|membrane|autophagy|endosomal vesicle fusion|intracellular protein transport|root morphogenesis	ko04148	Efferocytosis
CSS0002211	-1.64032	0.245604	Down	HAT22	Homeobox-leucine zipper protein HAT22	GO:0005634,GO:0003700,GO:0000981,GO:0000976,GO:0009738,GO:0009737,GO:0009735,GO:0009414	nucleus|DNA-binding transcription factor activity|DNA-binding transcription factor activity, RNA polymerase II-specific|transcription cis-regulatory region binding|abscisic acid-activated signaling pathway|response to abscisic acid|response to cytokinin|response to water deprivation
CSS0002212	1.76472	0.447745	Up	At3g43660	Vacuolar iron transporter homolog 4	GO:0016020,GO:0005774,GO:0005381,GO:0005384,GO:0030026,GO:0006880	membrane|vacuolar membrane|iron ion transmembrane transporter activity|manganese ion transmembrane transporter activity|cellular manganese ion homeostasis|intracellular sequestering of iron ion
CSS0002213	0.691646	0.189713	Up
CSS0002215	0.64917	0.410559	Up		31 kDa ribonucleoprotein, chloroplastic	GO:0009507,GO:1990904,GO:0003723,GO:0006397	chloroplast|ribonucleoprotein complex|RNA binding|mRNA processing
CSS0002217	1.14751	0.171126	Up	AMT1-3	Ammonium transporter 1 member 3	GO:0005886,GO:0008519,GO:0097272,GO:0072488	plasma membrane|ammonium transmembrane transporter activity|ammonium homeostasis|ammonium transmembrane transport
CSS0002218	-1.00869	0.225061	Down	PIP1-2	Aquaporin PIP1-2	GO:0005886,GO:0015267	plasma membrane|channel activity
CSS0002219	0.24263	0.737662	Up
CSS0002220	-0.31368	0.1064	Down	CAFP	Cell division cycle protein 48 homolog	GO:0005524,GO:0016887,GO:0007049	ATP binding|ATP hydrolysis activity|cell cycle	ko04141	Protein processing in endoplasmic reticulum
CSS0002221	0.149457	0.864546	Up
CSS0002222	-0.548054	0.0941476	Down	SPT16	FACT complex subunit SPT16	GO:0000791,GO:0035101,GO:0005730,GO:0005634,GO:0031491,GO:0006281,GO:0006260,GO:0006368,GO:0010228	euchromatin|FACT complex|nucleolus|nucleus|nucleosome binding|DNA repair|DNA replication|transcription elongation by RNA polymerase II promoter|vegetative to reproductive phase transition of meristem
CSS0002226	-0.0189055	0.942338	Down	ZEU1	Thymidylate kinase	GO:0005737,GO:0005739,GO:0005654,GO:0005634,GO:0005524,GO:0004550,GO:0004798,GO:0009041,GO:0006233,GO:0006235,GO:0006227,GO:0009793,GO:0016310	cytoplasm|mitochondrion|nucleoplasm|nucleus|ATP binding|nucleoside diphosphate kinase activity|thymidylate kinase activity|uridylate kinase activity|dTDP biosynthetic process|dTTP biosynthetic process|dUDP biosynthetic process|embryo development ending in seed dormancy|phosphorylation	ko00240	Pyrimidine metabolism
CSS0002228	-0.110641	0.794407	Down	SOV	DIS3-like exonuclease 2	GO:0005737,GO:0000932,GO:0000175,GO:0046872,GO:0003723,GO:0000291,GO:0034427,GO:1990074	cytoplasm|P-body|3'-5'-exoribonuclease activity|metal ion binding|RNA binding|nuclear-transcribed mRNA catabolic process, exonucleolytic|nuclear-transcribed mRNA catabolic process, exonucleolytic, 3'-5'|polyuridylation-dependent mRNA catabolic process
CSS0002229	-1.25982	0.0101584	Down
CSS0002231	-0.0998298	0.817759	Down	At5g49945	Uncharacterized protein At5g49945	GO:0005783,GO:0016020,GO:0005509,GO:0032469	endoplasmic reticulum|membrane|calcium ion binding|endoplasmic reticulum calcium ion homeostasis
CSS0002233	-0.148952	0.724337	Down	ADCS	Aminodeoxychorismate synthase, chloroplastic	GO:0009507,GO:0005737,GO:0046820,GO:0046656,GO:0006541,GO:0008153,GO:0046654	chloroplast|cytoplasm|4-amino-4-deoxychorismate synthase activity|folic acid biosynthetic process|glutamine metabolic process|para-aminobenzoic acid biosynthetic process|tetrahydrofolate biosynthetic process	ko00790	Folate biosynthesis
CSS0002234	-2.85949	0.0821708	Down	AGL12	Agamous-like MADS-box protein AGL12	GO:0005634,GO:0003700,GO:0000981,GO:0046983,GO:0000978,GO:0009908,GO:0045944,GO:0006357,GO:0048364,GO:0010228	nucleus|DNA-binding transcription factor activity|DNA-binding transcription factor activity, RNA polymerase II-specific|protein dimerization activity|RNA polymerase II cis-regulatory region sequence-specific DNA binding|flower development|positive regulation of transcription by RNA polymerase II|regulation of transcription by RNA polymerase II|root development|vegetative to reproductive phase tra…
CSS0002235	-0.478198	0.104513	Down
CSS0002236	-0.292524	0.757376	Down
CSS0002238	-0.176454	0.633869	Down	VPS18	Vacuolar sorting protein 18	GO:0033263,GO:0005737,GO:0005768,GO:0010008,GO:0005576,GO:0030897,GO:0009705,GO:0046872,GO:0030674,GO:0007032,GO:0006886,GO:0048284,GO:0010015,GO:0007033,GO:0006904	CORVET complex|cytoplasm|endosome|endosome membrane|extracellular region|HOPS complex|plant-type vacuole membrane|metal ion binding|protein-macromolecule adaptor activity|endosome organization|intracellular protein transport|organelle fusion|root morphogenesis|vacuole organization|vesicle docking involved in exocytosis	ko04148	Efferocytosis
CSS0002240	-2.09338	0.0058367	Down	CRK8	Cysteine-rich receptor-like protein kinase 8	GO:0005886,GO:0005524,GO:0106310,GO:0004674,GO:0042742,GO:0006468	plasma membrane|ATP binding|protein serine kinase activity|protein serine/threonine kinase activity|defense response to bacterium|protein phosphorylation
CSS0002241	1.55515	0.221874	Up	HPAT3	Hydroxyproline O-arabinosyltransferase 3	GO:0005768,GO:0005794,GO:0000138,GO:0016020,GO:0005802,GO:1990585,GO:0102562	endosome|Golgi apparatus|Golgi trans cisterna|membrane|trans-Golgi network|hydroxyproline O-arabinosyltransferase activity|hydroxyproline O-arbinofuranose transferase activity
CSS0002242	0.359013	0.672063	Up
CSS0002243	0.987052	0.0350077	Up	TON1A	Protein TONNEAU 1a	GO:0005938,GO:0030863,GO:0030981,GO:0005737,GO:0005829,GO:0009574,GO:0030865,GO:0000226,GO:0000913	cell cortex|cortical cytoskeleton|cortical microtubule cytoskeleton|cytoplasm|cytosol|preprophase band|cortical cytoskeleton organization|microtubule cytoskeleton organization|preprophase band assembly
CSS0002246	1.52578	0.351731	Up
CSS0002248	0.233713	0.597423	Up	IBR5	Protein-tyrosine-phosphatase IBR5	GO:0005634,GO:0033549,GO:0004725,GO:0008138,GO:0009738,GO:0009734,GO:0035556,GO:0043407,GO:0006470,GO:0046620,GO:0061388,GO:0009737,GO:0009733	nucleus|MAP kinase phosphatase activity|protein tyrosine phosphatase activity|protein tyrosine/serine/threonine phosphatase activity|abscisic acid-activated signaling pathway|auxin-activated signaling pathway|intracellular signal transduction|negative regulation of MAP kinase activity|protein dephosphorylation|regulation of organ growth|regulation of rate of cell growth|response to abscisic acid|…	ko04148	Efferocytosis
CSS0002250	-0.080516	0.744816	Down	At2g39795	Uncharacterized protein At2g39795, mitochondrial	GO:0005794,GO:0005759,GO:0005739	Golgi apparatus|mitochondrial matrix|mitochondrion
CSS0002251	0.207077	0.636645	Up	CCX5	Cation/calcium exchanger 5	GO:0016020,GO:0034399,GO:0005886,GO:0015297,GO:0008324,GO:0015079,GO:0015081,GO:0006812,GO:0071805,GO:0006814	membrane|nuclear periphery|plasma membrane|antiporter activity|cation transmembrane transporter activity|potassium ion transmembrane transporter activity|sodium ion transmembrane transporter activity|cation transport|potassium ion transmembrane transport|sodium ion transport
CSS0002252	1.74477	0.114804	Up	At3g47570	Probable LRR receptor-like serine/threonine-protein kinase At3g47570	GO:0005886,GO:0005524,GO:0106310,GO:0004674,GO:0006468	plasma membrane|ATP binding|protein serine kinase activity|protein serine/threonine kinase activity|protein phosphorylation
CSS0002253	0.487432	0.274072	Up
CSS0002256	-1.43384	0.199768	Down	RFS2	Probable galactinol--sucrose galactosyltransferase 2	GO:0009506,GO:0016757,GO:0052692,GO:0034484,GO:0006979	plasmodesma|glycosyltransferase activity|raffinose alpha-galactosidase activity|raffinose catabolic process|response to oxidative stress
CSS0002258	0.429804	0.336352	Up	SEND1	Single-strand DNA endonuclease 1	GO:0005634,GO:0017108,GO:0008821,GO:0046872,GO:0006281,GO:0000723,GO:0009650	nucleus|5'-flap endonuclease activity|crossover junction endodeoxyribonuclease activity|metal ion binding|DNA repair|telomere maintenance|UV protection
CSS0002259	3.25845	0.259882	Up	PPA-AT	Bifunctional aspartate aminotransferase and glutamate/aspartate-prephenate aminotransferase	GO:0009507,GO:0033853,GO:0033854,GO:0042802,GO:0004069,GO:0030170,GO:0009095,GO:0009094	chloroplast|aspartate-prephenate aminotransferase activity|glutamate-prephenate aminotransferase activity|identical protein binding|L-aspartate:2-oxoglutarate aminotransferase activity|pyridoxal phosphate binding|aromatic amino acid family biosynthetic process, prephenate pathway|L-phenylalanine biosynthetic process	ko00350,ko00360,ko00400,ko00950,ko00960	Tyrosine metabolism|Phenylalanine metabolism|Phenylalanine, tyrosine and tryptophan biosynthesis|Isoquinoline alkaloid biosynthesis|Tropane, piperidine and pyridine alkaloid biosynthesis
CSS0002260	0.102237	0.831423	Up					ko03013	Nucleocytoplasmic transport
CSS0002262	-3.97353	0.127836	Down
CSS0002263	-0.493036	0.539459	Down	CXE12	Probable carboxylesterase 12	GO:0005737,GO:0005829,GO:0106435,GO:0052689,GO:0016787	cytoplasm|cytosol|carboxylesterase activity|carboxylic ester hydrolase activity|hydrolase activity
CSS0002266	1.39466	0.336783	Up
CSS0002268	-2.27596	3.13413e-05	Down	PSKR1	Phytosulfokine receptor 1	GO:0005886,GO:0005524,GO:0004383,GO:0001653,GO:0004672,GO:0106310,GO:0004674,GO:0045087,GO:0006468,GO:0031347	plasma membrane|ATP binding|guanylate cyclase activity|peptide receptor activity|protein kinase activity|protein serine kinase activity|protein serine/threonine kinase activity|innate immune response|protein phosphorylation|regulation of defense response
CSS0002269	0.0347919	0.867848	Up
CSS0002271	-1.26287	0.2487	Down	HSFB3	Heat stress transcription factor B-3	GO:0005737,GO:0005634,GO:0003700,GO:0000978,GO:0006357	cytoplasm|nucleus|DNA-binding transcription factor activity|RNA polymerase II cis-regulatory region sequence-specific DNA binding|regulation of transcription by RNA polymerase II
CSS0002272	0.656335	0.00633768	Up		14-3-3-like protein C	GO:0005737,GO:0007165	cytoplasm|signal transduction
CSS0002274	-2.05161	0.394702	Down	HAK13	Probable potassium transporter 13	GO:0016020,GO:0015079,GO:0006813	membrane|potassium ion transmembrane transporter activity|potassium ion transport
CSS0002275	-0.147928	0.750288	Down	CBSCBS2	SNF1-related protein kinase regulatory subunit gamma-1-like	GO:0005739,GO:0005975	mitochondrion|carbohydrate metabolic process
CSS0002276	-0.0484606	0.876149	Down
CSS0002278	2.22128	0.0847977	Up		Calcium-binding allergen Ole e 8	GO:0005509	calcium ion binding	ko04626	Plant-pathogen interaction
CSS0002279	0.892788	0.48931	Up	CRK34	Cysteine-rich receptor-like protein kinase 34	GO:0005886,GO:0005524,GO:0106310,GO:0004674,GO:0042742,GO:0006468	plasma membrane|ATP binding|protein serine kinase activity|protein serine/threonine kinase activity|defense response to bacterium|protein phosphorylation
CSS0002282	-0.212445	0.300127	Down
CSS0002284	0.608552	0.088416	Up	RKP	E3 ubiquitin-protein ligase RKP	GO:0005737,GO:0016020,GO:0046872,GO:0061630,GO:0004842,GO:2000060,GO:0030163,GO:0016567,GO:0051603	cytoplasm|membrane|metal ion binding|ubiquitin protein ligase activity|ubiquitin-protein transferase activity|positive regulation of ubiquitin-dependent protein catabolic process|protein catabolic process|protein ubiquitination|proteolysis involved in protein catabolic process
CSS0002285	-0.194867	0.454254	Down	CHY1	3-hydroxyisobutyryl-CoA hydrolase 1	GO:0005777,GO:0009536,GO:0003860,GO:0009409,GO:0006574	peroxisome|plastid|3-hydroxyisobutyryl-CoA hydrolase activity|response to cold|valine catabolic process	ko00640,ko00280,ko00410	Propanoate metabolism|Valine, leucine and isoleucine degradation|beta-Alanine metabolism
CSS0002286	0.913619	0.0409472	Up	FAN1	Fanconi-associated nuclease 1 homolog	GO:0005634,GO:0008409,GO:0017108,GO:0070336,GO:0016818,GO:0004528,GO:0008270,GO:0007129,GO:0036297	nucleus|5'-3' exonuclease activity|5'-flap endonuclease activity|flap-structured DNA binding|hydrolase activity, acting on acid anhydrides, in phosphorus-containing anhydrides|phosphodiesterase I activity|zinc ion binding|homologous chromosome pairing at meiosis|interstrand cross-link repair
CSS0002288	-0.0791512	0.731559	Down	PAT14	Probable protein S-acyltransferase 14	GO:0005769,GO:0005783,GO:0005794,GO:0000138,GO:0016020,GO:0005802,GO:0019707,GO:0019706,GO:0010150,GO:0018230,GO:0006612,GO:1900055,GO:2000377	early endosome|endoplasmic reticulum|Golgi apparatus|Golgi trans cisterna|membrane|trans-Golgi network|protein-cysteine S-acyltransferase activity|protein-cysteine S-palmitoyltransferase activity|leaf senescence|peptidyl-L-cysteine S-palmitoylation|protein targeting to membrane|regulation of leaf senescence|regulation of reactive oxygen species metabolic process
CSS0002289	0.686148	0.173454	Up	PSRP2	30S ribosomal protein 2, chloroplastic	GO:0009507,GO:1990904,GO:0005840,GO:0019843	chloroplast|ribonucleoprotein complex|ribosome|rRNA binding	ko03015,ko03018	mRNA surveillance pathway|RNA degradation
CSS0002290	4.13874	0.255321	Up	SOFL5	Protein SOB FIVE-LIKE 5	GO:0005737,GO:0005634,GO:0009691,GO:0009690,GO:0009736	cytoplasm|nucleus|cytokinin biosynthetic process|cytokinin metabolic process|cytokinin-activated signaling pathway
CSS0002291	7.05593	0.000384915	Up	Os03g0743400	Probable histone H2A variant 3	GO:0000786,GO:0005634,GO:0003677,GO:0046982,GO:0030527	nucleosome|nucleus|DNA binding|protein heterodimerization activity|structural constituent of chromatin	ko03082	ATP-dependent chromatin remodeling
CSS0002292	1.278	0.489354	Up	PCMP-E86	Pentatricopeptide repeat-containing protein At3g53360, mitochondrial	GO:0043231,GO:0005739,GO:0003723,GO:0009451	intracellular membrane-bounded organelle|mitochondrion|RNA binding|RNA modification
CSS0002293	0.665735	0.520693	Up
CSS0002294	-1.25601	0.38996	Down	FLXL2	Protein FLX-like 2	GO:0016604,GO:0030154,GO:0009908	nuclear body|cell differentiation|flower development
CSS0002295	-0.503956	0.608068	Down	At3g53170	Pentatricopeptide repeat-containing protein At3g53170
CSS0002296	-0.350663	0.125683	Down
CSS0002297	0.00998925	0.960754	Up	At3g09470	UNC93-like protein 3	GO:0005886,GO:0055075	plasma membrane|potassium ion homeostasis
CSS0002298	-0.730863	0.177738	Down
CSS0002302	0.115872	0.614453	Up	MORF9	Multiple organellar RNA editing factor 9, chloroplastic	GO:0009507,GO:0009941,GO:0009570,GO:0003729,GO:0046983,GO:0042803,GO:1900865,GO:0016554,GO:0006397	chloroplast|chloroplast envelope|chloroplast stroma|mRNA binding|protein dimerization activity|protein homodimerization activity|chloroplast RNA modification|cytidine to uridine editing|mRNA processing
[truncated: 32,854 more rows]

## Sheet: Table S2
Table S2 GO analysis of DEGs
GO_accession	Term	Category	ListHits	p-value	Regulation	Regulation	Enrichment_score	GeneID
[truncated: 2,341 more rows]

## Sheet: Table S3
Table S3 Top 30 GO enrichment terms
[truncated: 31 more rows]

[truncated: 3 more sheets: Table S4, Table S5, Table S6]
